# Supplementary material for: Radical Pairing Interactions and Donor–Acceptor Interactions in Cyclobis(paraquat-p-phenylene) Inclusion Complexes
Source: MDPI journal article supplement (doi:10.3390/molecules28052057), 2023-02-22
Supplement: s1 [file s1]

## I. Supplementary figures and tables

Figure S1. Intermolecular BCPs found in the a) NDI-CBPQT<sup>4+</sup> b) NDI-CBPQT<sup>•3+</sup> c) NDI-CBPQT<sup>2(•+)</sup>(T) d) NDI-CBPQT<sup>•+</sup> e) NDI-CBPQT<sup>0</sup> f) NDI-CBPQT<sup>2(•+)</sup>(S) complexes.

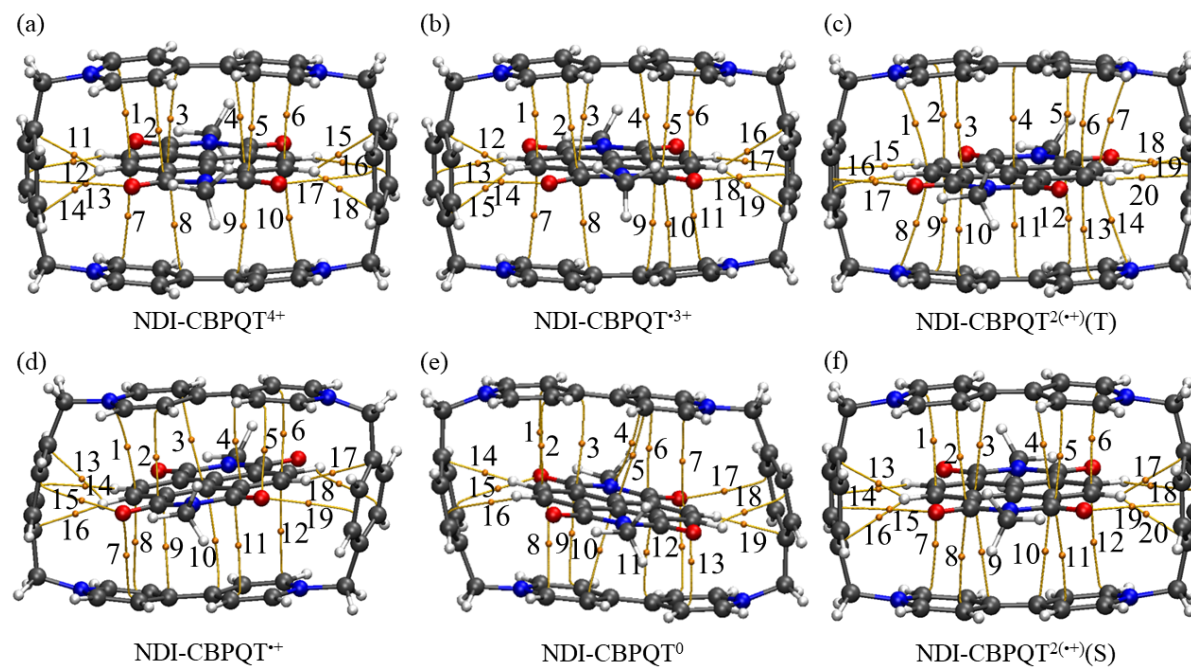

Figure S2. IGM plot iso-surfaces of NDI-CBPQT<sup>n+</sup> (n=0-4) complexes.  $\delta g^{\text{inter}} = 0.005$  a.u. All iso-surfaces are colored according to a BGR scheme over the range  $-0.03 < \text{sign}(\lambda_2)\rho < +0.05$  a.u.

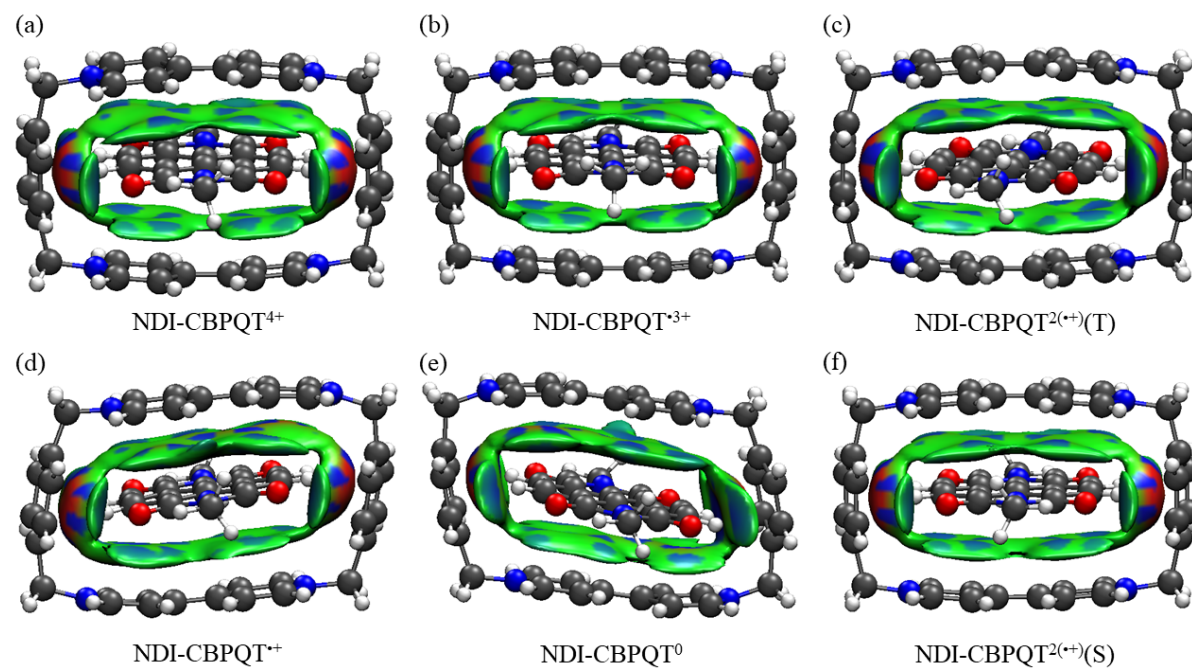

Figure S3. Intermolecular BCPs found in the a) TTF-CBPQT<sup>4+</sup> b) TTF-CBPQT<sup>3+</sup> c) TTF-CBPQT<sup>2(++)</sup>(T) d) TTF-CBPQT<sup>++</sup> e) TTF-CBPQT<sup>0</sup> f) TTF-CBPQT<sup>2(++)</sup>(S) complexes.

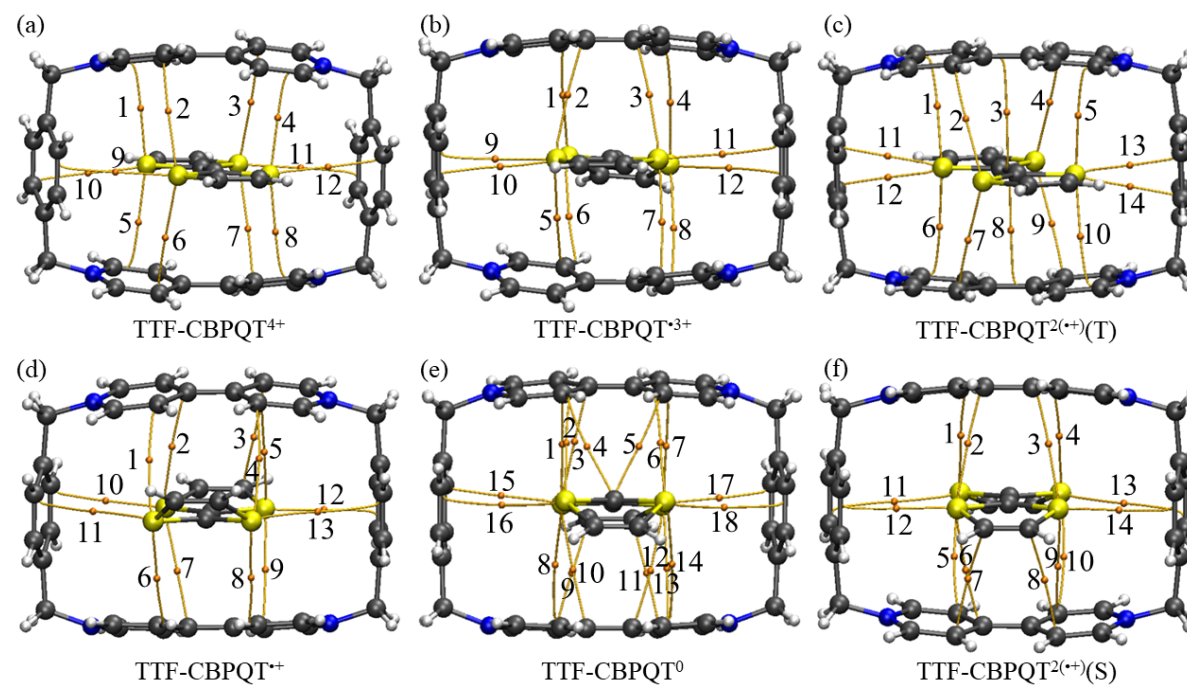

Figure S4. IGM plot iso-surfaces of TTF-CBPQT<sup>n+</sup> (n=0-4) complexes.  $\delta g^{\text{inter}} = 0.005$  a.u. All iso-surfaces are colored according to a BGR scheme over the range  $-0.03 < \text{sign}(\lambda_2)\rho < +0.05$  a.u.

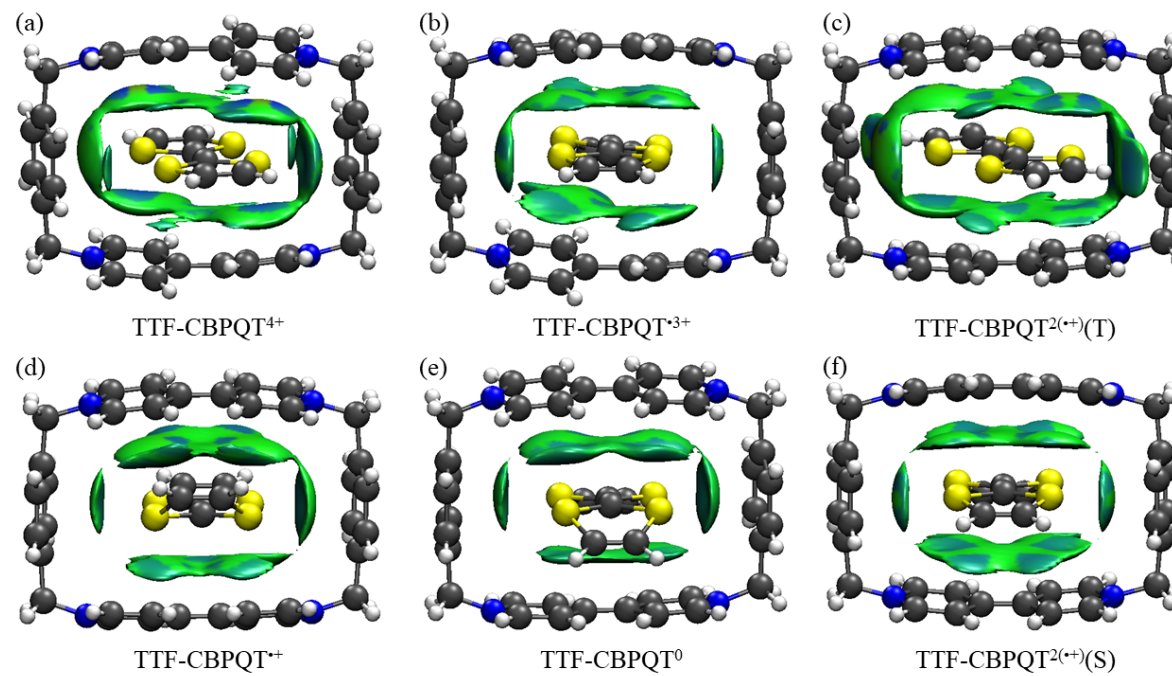

Figure S5. Intermolecular BCPs in a)  $\text{BIPY}^{\bullet+}$ - $\text{CBPQT}^{4+}$  b)  $\text{BIPY}^{\bullet+}$ - $\text{CBPQT}^{3+}$  c)  $\text{BIPY}^{\bullet+}$ - $\text{CBPQT}^{2(++)}(\text{T})$  d)  $\text{BIPY}^{\bullet+}$ - $\text{CBPQT}^{\bullet+}$  e)  $\text{BIPY}^{\bullet+}$ - $\text{CBPQT}^0$  f)  $\text{BIPY}^{\bullet+}$ - $\text{CBPQT}^{2(++)}(\text{S})$  complexes.

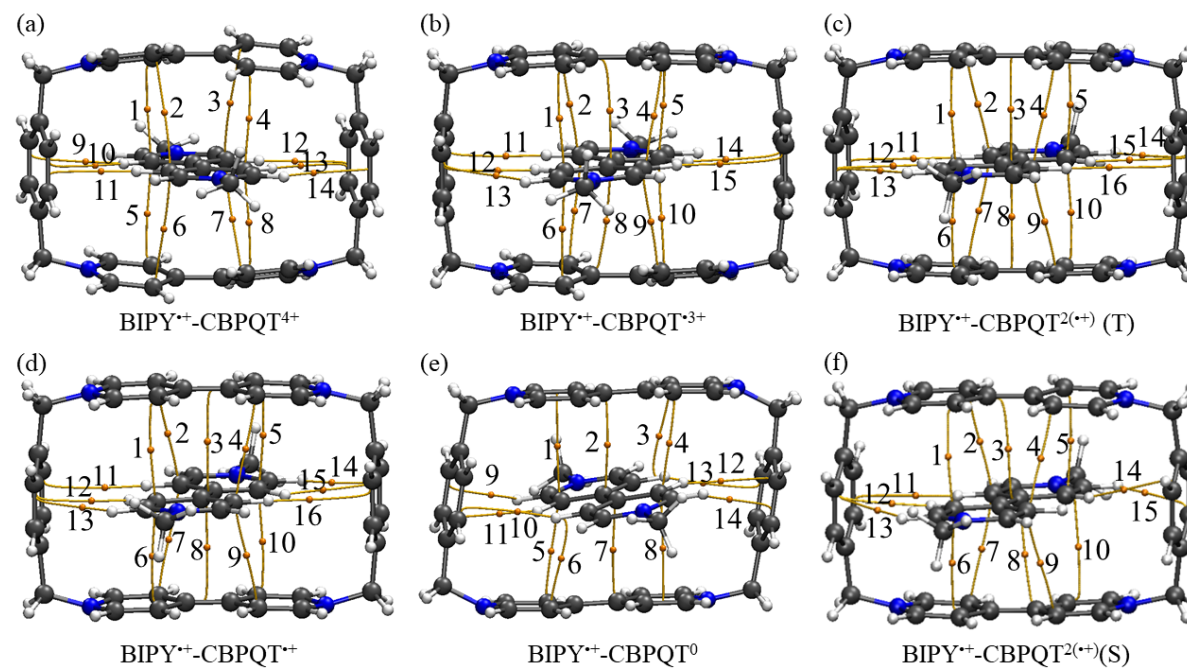

Figure S6. IGM plot iso-surfaces of BIPY<sup>•+</sup>-CBPQT<sup>n+</sup> (n=0-4) complexes.  $\delta g^{\text{inter}} = 0.005$  a.u. All iso-surfaces are colored according to a BGR scheme over the range  $-0.03 < \text{sign}(\lambda_2)\rho < +0.05$  a.u.

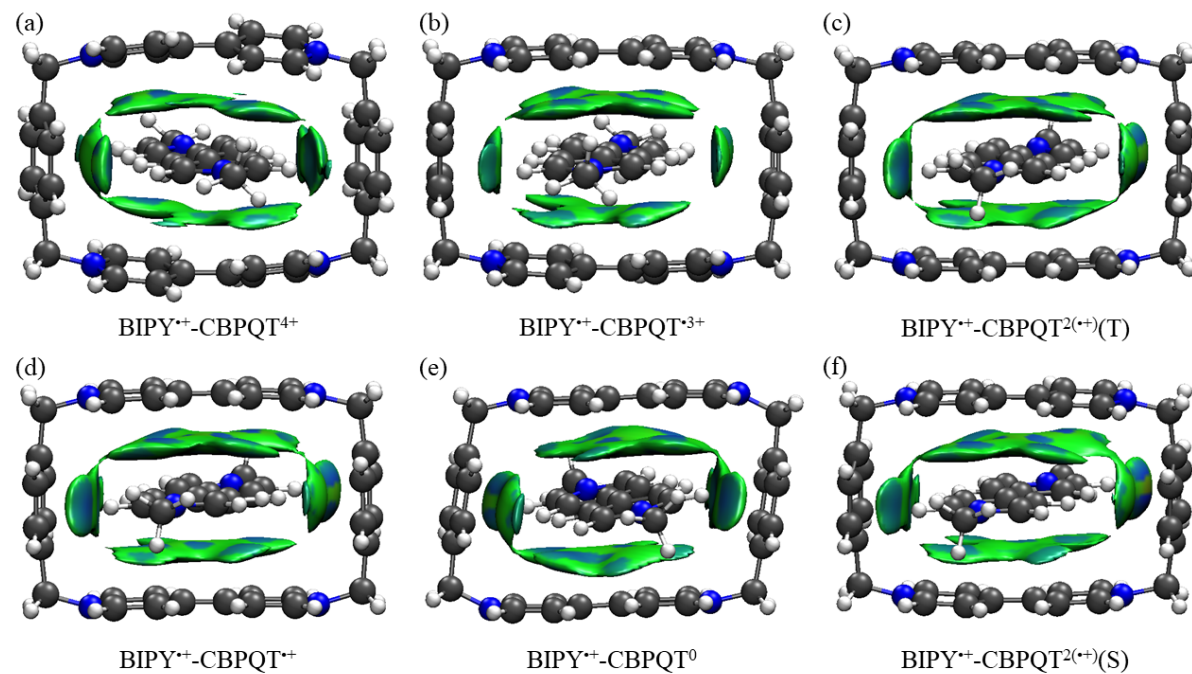



Figure S7. Intermolecular BCPs found in a)  $\text{NDI}^{\bullet-}\text{-CBPQT}^{4+}$  b)  $\text{NDI}^{\bullet-}\text{-CBPQT}^{\bullet 3+}$  c)  $\text{NDI}^{\bullet-}\text{-CBPQT}^{2(++)}(\text{T})$  d)  $\text{NDI}^{\bullet-}\text{-CBPQT}^{\bullet +}$  e)  $\text{NDI}^{\bullet-}\text{-CBPQT}^0$  f)  $\text{NDI}^{\bullet-}\text{-CBPQT}^{2(++)}(\text{S})$  complexes.

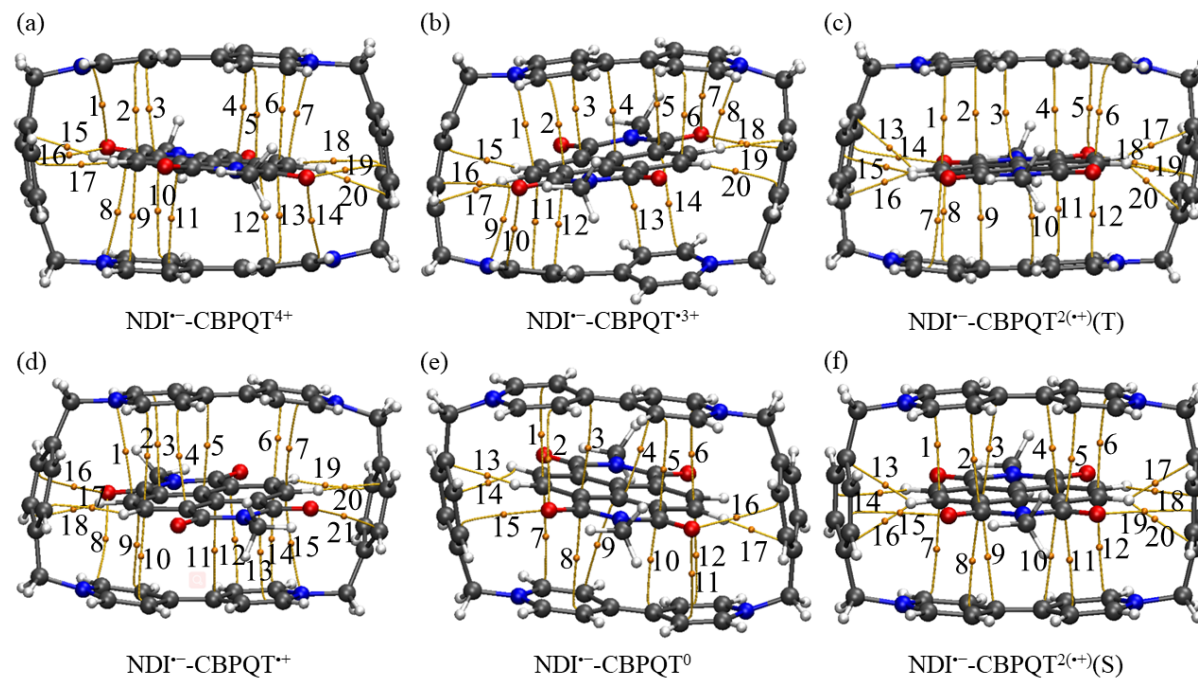

Figure S8. IGM plot iso-surfaces of  $\text{NDI}^{\bullet-}\text{-CBPQT}^{n+}$  ( $n=0-4$ ) complexes.  $\delta g^{\text{inter}} = 0.005$  a.u. All iso-surfaces are colored according to a BGR scheme over the range  $-0.03 < \text{sign}(\lambda_2)\rho < +0.05$  a.u.

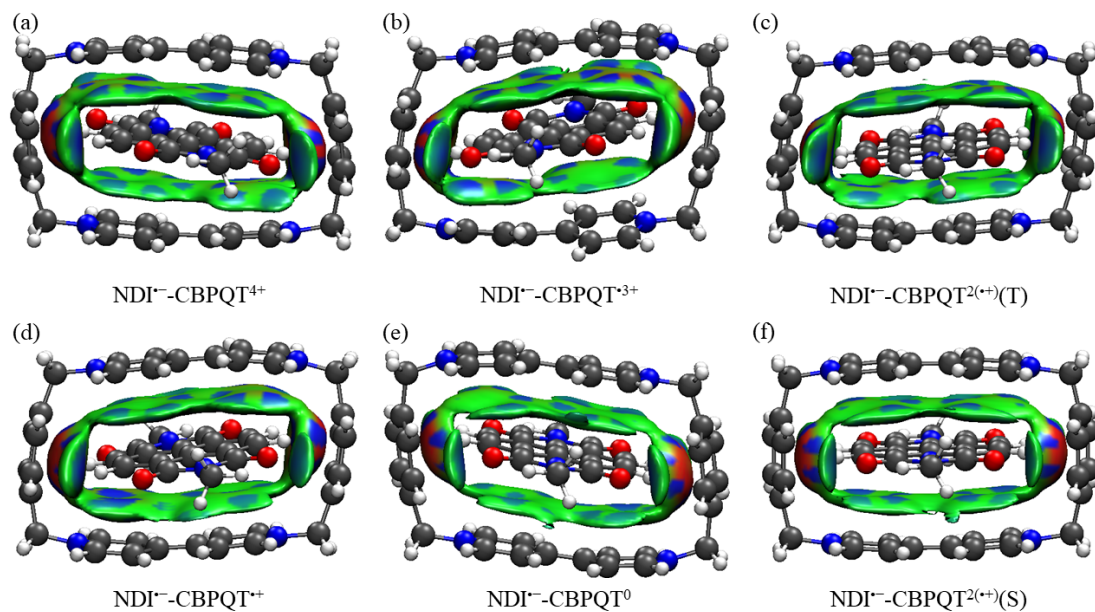



Figure S9. Intermolecular BCPs in a)  $\text{BTA}^{\bullet-}\text{-CBPQT}^{4+}$  b)  $\text{BTA}^{\bullet-}\text{-CBPQT}^{3+}$  c)  $\text{BTA}^{\bullet-}\text{-CBPQT}^{2(++)}(\text{T})$  d)  $\text{BTA}^{\bullet-}\text{-CBPQT}^{++}$  e)  $\text{BTA}^{\bullet-}\text{-CBPQT}^0$  f)  $\text{BTA}^{\bullet-}\text{-CBPQT}^{2(++)}(\text{S})$  complexes.

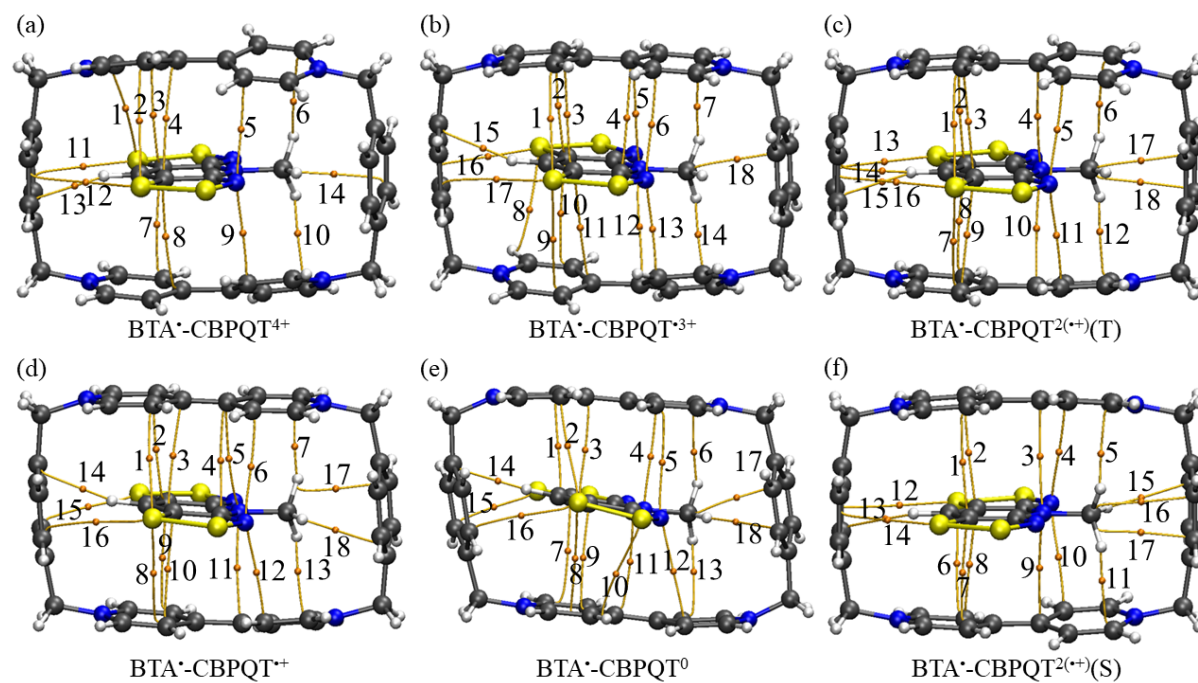

Figure S10. IGM plot iso-surfaces of BTA<sup>•</sup>-CBPQT<sup>n+</sup> (n=0-4) complexes.  $\delta g^{\text{inter}} = 0.005$  a.u. All iso-surfaces are colored according to a BGR scheme over the range  $-0.03 < \text{sign}(\lambda_2)\rho < +0.05$  a.u.

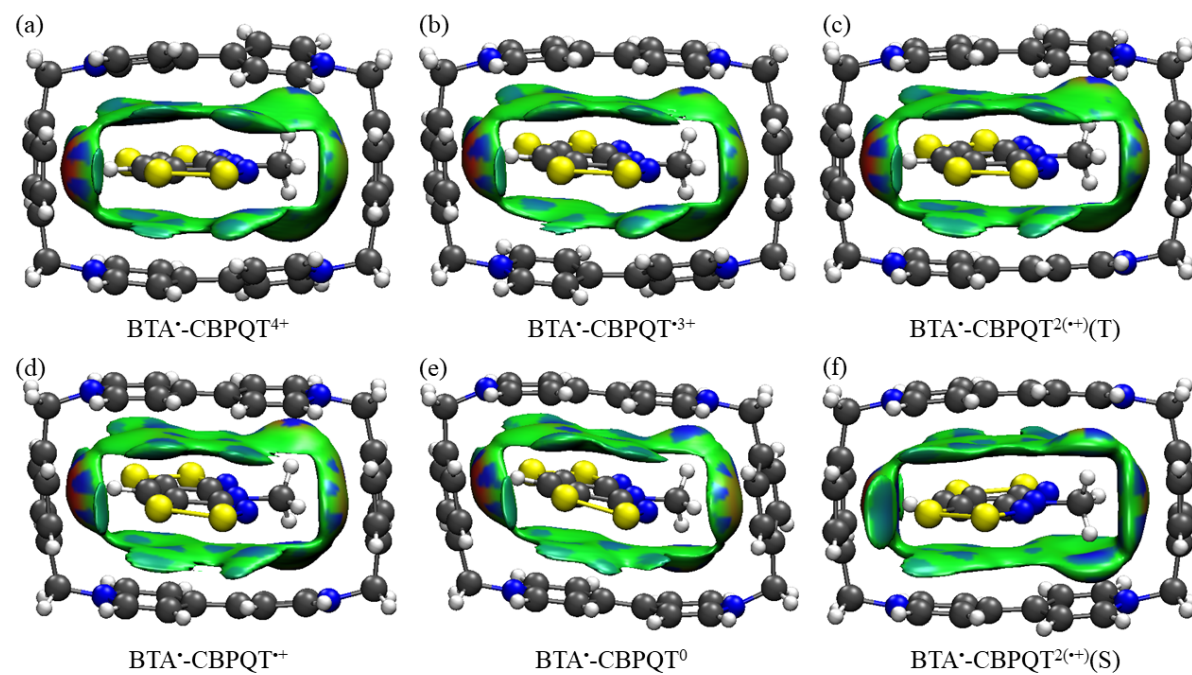

Table S1. AIM analysis results of the intermolecular interactions in the BIPY<sup>2+</sup>-CBPQT<sup>n+</sup> complexes (a.u.)

|                                                | Types               | $\rho$ | $\nabla^2\rho$ | $ V /G$ |
|------------------------------------------------|---------------------|--------|----------------|---------|
| BIPY <sup>2+</sup> -CBPQT <sup>4+</sup>        | $\pi\cdots\pi(1)$   | 0.0021 | 0.0069         | 0.6742  |
|                                                | $\pi\cdots\pi(2)$   | 0.0046 | 0.0126         | 0.7607  |
|                                                | $\pi\cdots\pi(3)$   | 0.0030 | 0.0097         | 0.7108  |
|                                                | $\pi\cdots\pi(4)$   | 0.0037 | 0.0108         | 0.7610  |
|                                                | $\pi\cdots\pi(5)$   | 0.0052 | 0.0144         | 0.7646  |
|                                                | $\pi\cdots\pi(6)$   | 0.0022 | 0.0070         | 0.7134  |
|                                                | $\pi\cdots\pi(7)$   | 0.0032 | 0.0103         | 0.6948  |
|                                                | C-H $\cdots\pi(8)$  | 0.0071 | 0.0235         | 0.7405  |
|                                                | C-H $\cdots\pi(9)$  | 0.0055 | 0.0181         | 0.7388  |
|                                                | C-H $\cdots\pi(10)$ | 0.0041 | 0.0142         | 0.7088  |
|                                                | C-H $\cdots\pi(11)$ | 0.0047 | 0.0159         | 0.6769  |
|                                                | C-H $\cdots\pi(12)$ | 0.0019 | 0.0063         | 0.5976  |
| BIPY <sup>2+</sup> -CBPQT <sup>3+</sup>        | $\pi\cdots\pi(1)$   | 0.0075 | 0.0204         | 0.7924  |
|                                                | $\pi\cdots\pi(2)$   | 0.0060 | 0.0162         | 0.7856  |
|                                                | $\pi\cdots\pi(3)$   | 0.0058 | 0.0154         | 0.7860  |
|                                                | $\pi\cdots\pi(4)$   | 0.0058 | 0.0159         | 0.7836  |
|                                                | $\pi\cdots\pi(5)$   | 0.0075 | 0.0206         | 0.7911  |
|                                                | $\pi\cdots\pi(6)$   | 0.0043 | 0.0119         | 0.7615  |
|                                                | $\pi\cdots\pi(7)$   | 0.0040 | 0.0112         | 0.7572  |
|                                                | C-H $\cdots\pi(8)$  | 0.0044 | 0.0149         | 0.7215  |
|                                                | C-H $\cdots\pi(9)$  | 0.0058 | 0.0179         | 0.7226  |
|                                                | C-H $\cdots\pi(10)$ | 0.0044 | 0.0147         | 0.7182  |
|                                                | C-H $\cdots\pi(11)$ | 0.0050 | 0.0154         | 0.7088  |
| BIPY <sup>2+</sup> -CBPQT <sup>2(•+)</sup> (T) | $\pi\cdots\pi(1)$   | 0.0065 | 0.0175         | 0.7894  |
|                                                | $\pi\cdots\pi(2)$   | 0.0051 | 0.0143         | 0.7784  |
|                                                | $\pi\cdots\pi(3)$   | 0.0053 | 0.0148         | 0.7834  |
|                                                | $\pi\cdots\pi(4)$   | 0.0053 | 0.0150         | 0.7789  |
|                                                | $\pi\cdots\pi(5)$   | 0.0063 | 0.0172         | 0.7881  |
|                                                | $\pi\cdots\pi(6)$   | 0.0063 | 0.0170         | 0.7887  |

|                                                |                     |        |        |        |
|------------------------------------------------|---------------------|--------|--------|--------|
|                                                | $\pi\ldots\pi(7)$   | 0.0054 | 0.0150 | 0.7795 |
|                                                | $\pi\ldots\pi(8)$   | 0.0053 | 0.0146 | 0.7830 |
|                                                | $\pi\ldots\pi(9)$   | 0.0051 | 0.0142 | 0.7773 |
|                                                | $\pi\ldots\pi(10)$  | 0.0064 | 0.0172 | 0.7887 |
|                                                | C-H $\ldots\pi(11)$ | 0.0032 | 0.0099 | 0.6655 |
|                                                | C-H $\ldots\pi(12)$ | 0.0043 | 0.0143 | 0.7124 |
|                                                | C-H $\ldots\pi(13)$ | 0.0028 | 0.0097 | 0.6590 |
|                                                | C-H $\ldots\pi(14)$ | 0.0027 | 0.0095 | 0.6591 |
|                                                | C-H $\ldots\pi(15)$ | 0.0043 | 0.0142 | 0.7120 |
|                                                | C-H $\ldots\pi(16)$ | 0.0032 | 0.0099 | 0.6647 |
| BIPY <sup>2+</sup> -CBPQT <sup>2(•+)</sup> (S) | $\pi\ldots\pi(1)$   | 0.0065 | 0.0179 | 0.7890 |
|                                                | $\pi\ldots\pi(2)$   | 0.0064 | 0.0176 | 0.7876 |
|                                                | $\pi\ldots\pi(3)$   | 0.0058 | 0.0156 | 0.7878 |
|                                                | $\pi\ldots\pi(4)$   | 0.0062 | 0.0173 | 0.7860 |
|                                                | $\pi\ldots\pi(5)$   | 0.0063 | 0.0174 | 0.7866 |
|                                                | $\pi\ldots\pi(6)$   | 0.0064 | 0.0174 | 0.7867 |
|                                                | $\pi\ldots\pi(7)$   | 0.0063 | 0.0175 | 0.7864 |
|                                                | $\pi\ldots\pi(8)$   | 0.0059 | 0.0158 | 0.7875 |
|                                                | $\pi\ldots\pi(9)$   | 0.0064 | 0.0176 | 0.7864 |
|                                                | $\pi\ldots\pi(10)$  | 0.0065 | 0.0178 | 0.7879 |
|                                                | C-H $\ldots\pi(11)$ | 0.0044 | 0.0137 | 0.7056 |
|                                                | C-H $\ldots\pi(12)$ | 0.0034 | 0.0107 | 0.6801 |
|                                                | C-H $\ldots\pi(13)$ | 0.0034 | 0.0106 | 0.6791 |
|                                                | C-H $\ldots\pi(14)$ | 0.0043 | 0.0136 | 0.7049 |
| BIPY <sup>2+</sup> -CBPQT <sup>+</sup>         | $\pi\ldots\pi(1)$   | 0.0114 | 0.0306 | 0.8151 |
|                                                | $\pi\ldots\pi(2)$   | 0.0090 | 0.0251 | 0.8080 |
|                                                | $\pi\ldots\pi(3)$   | 0.0125 | 0.0269 | 0.7961 |
|                                                | $\pi\ldots\pi(4)$   | 0.0091 | 0.0253 | 0.8087 |
|                                                | $\pi\ldots\pi(5)$   | 0.0114 | 0.0307 | 0.8172 |
|                                                | $\pi\ldots\pi(6)$   | 0.0061 | 0.0162 | 0.7994 |
|                                                | $\pi\ldots\pi(7)$   | 0.0045 | 0.0126 | 0.7803 |

|                                        |                    |        |        |        |
|----------------------------------------|--------------------|--------|--------|--------|
| BIPY <sup>2+</sup> -CBPQT <sup>0</sup> | $\pi\ldots\pi(8)$  | 0.0049 | 0.0137 | 0.8070 |
|                                        | $\pi\ldots\pi(9)$  | 0.0043 | 0.0121 | 0.7783 |
|                                        | $\pi\ldots\pi(10)$ | 0.0061 | 0.0161 | 0.8002 |
|                                        | C-H... $\pi(11)$   | 0.0024 | 0.0074 | 0.6407 |
|                                        | C-H... $\pi(12)$   | 0.0042 | 0.0143 | 0.7205 |
|                                        | C-H... $\pi(13)$   | 0.0043 | 0.0144 | 0.6863 |
|                                        | C-H... $\pi(14)$   | 0.0042 | 0.0141 | 0.7204 |
|                                        | C-H... $\pi(15)$   | 0.0044 | 0.0146 | 0.6879 |
|                                        | C-H... $\pi(16)$   | 0.0024 | 0.0074 | 0.6415 |
|                                        | $\pi\ldots\pi(1)$  | 0.0095 | 0.0250 | 0.8077 |
|                                        | $\pi\ldots\pi(2)$  | 0.0069 | 0.0196 | 0.7931 |
|                                        | $\pi\ldots\pi(3)$  | 0.0097 | 0.0223 | 0.8070 |
|                                        | $\pi\ldots\pi(4)$  | 0.0069 | 0.0195 | 0.7954 |
|                                        | $\pi\ldots\pi(5)$  | 0.0095 | 0.0252 | 0.8096 |
|                                        | $\pi\ldots\pi(6)$  | 0.0095 | 0.0250 | 0.8081 |
|                                        | $\pi\ldots\pi(7)$  | 0.0068 | 0.0192 | 0.7936 |
|                                        | $\pi\ldots\pi(8)$  | 0.0096 | 0.0221 | 0.8073 |
|                                        | $\pi\ldots\pi(9)$  | 0.0069 | 0.0196 | 0.7952 |
|                                        | $\pi\ldots\pi(10)$ | 0.0095 | 0.0251 | 0.8089 |
|                                        | C-H... $\pi(11)$   | 0.0059 | 0.0198 | 0.7086 |
|                                        | C-H... $\pi(12)$   | 0.0039 | 0.0137 | 0.7253 |
|                                        | C-H... $\pi(13)$   | 0.0023 | 0.0069 | 0.6382 |
|                                        | C-H... $\pi(14)$   | 0.0023 | 0.0071 | 0.6403 |
|                                        | C-H... $\pi(15)$   | 0.0040 | 0.0140 | 0.7260 |
|                                        | C-H... $\pi(16)$   | 0.0060 | 0.0200 | 0.7093 |

Table S2. AIM analysis results of the intermolecular interactions in the NDI-CBPQT<sup>n+</sup> complexes (a.u.)

|                         | Types                     | $\rho$ | $\nabla^2\rho$ | $ V /G$ |
|-------------------------|---------------------------|--------|----------------|---------|
| NDI-CBPQT <sup>4+</sup> | $\pi\cdots\pi(1)$         | 0.0064 | 0.0189         | 0.7662  |
|                         | $\pi\cdots\pi(2)$         | 0.0062 | 0.0216         | 0.7166  |
|                         | $\pi\cdots\pi(3)$         | 0.0063 | 0.0183         | 0.7892  |
|                         | $\pi\cdots\pi(4)$         | 0.0061 | 0.0177         | 0.7889  |
|                         | $\pi\cdots\pi(5)$         | 0.0052 | 0.0174         | 0.7069  |
|                         | $\pi\cdots\pi(6)$         | 0.0071 | 0.0208         | 0.7669  |
|                         | $\pi\cdots\pi(7)$         | 0.0069 | 0.0203         | 0.7639  |
|                         | $\pi\cdots\pi(8)$         | 0.0060 | 0.0173         | 0.7885  |
|                         | $\pi\cdots\pi(9)$         | 0.0061 | 0.0176         | 0.7871  |
|                         | $\pi\cdots\pi(10)$        | 0.0064 | 0.0186         | 0.7630  |
|                         | C-H $\cdots\pi(11)$       | 0.0131 | 0.0490         | 0.8306  |
|                         | C-H $\cdots\pi(12)$       | 0.0074 | 0.0258         | 0.7171  |
|                         | lone pair $\cdots\pi(13)$ | 0.0079 | 0.0260         | 0.8349  |
|                         | C-H $\cdots\pi(14)$       | 0.0126 | 0.0480         | 0.8190  |
|                         | C-H $\cdots\pi(15)$       | 0.0126 | 0.0481         | 0.8197  |
|                         | C-H $\cdots\pi(16)$       | 0.0072 | 0.0251         | 0.7176  |
|                         | lone pair $\cdots\pi(17)$ | 0.0079 | 0.0263         | 0.8363  |
|                         | C-H $\cdots\pi(18)$       | 0.0133 | 0.0496         | 0.8300  |
| NDI-CBPQT <sup>3+</sup> | $\pi\cdots\pi(1)$         | 0.0070 | 0.0203         | 0.7802  |
|                         | $\pi\cdots\pi(2)$         | 0.0063 | 0.0212         | 0.7273  |
|                         | $\pi\cdots\pi(3)$         | 0.0065 | 0.0195         | 0.7971  |
|                         | $\pi\cdots\pi(4)$         | 0.0063 | 0.0189         | 0.7949  |
|                         | $\pi\cdots\pi(5)$         | 0.0063 | 0.0209         | 0.7270  |
|                         | $\pi\cdots\pi(6)$         | 0.0068 | 0.0199         | 0.7803  |
|                         | $\pi\cdots\pi(7)$         | 0.0071 | 0.0206         | 0.7627  |
|                         | $\pi\cdots\pi(8)$         | 0.0060 | 0.0175         | 0.7869  |
|                         | $\pi\cdots\pi(9)$         | 0.0063 | 0.0180         | 0.7852  |
|                         | $\pi\cdots\pi(10)$        | 0.0058 | 0.0202         | 0.7146  |
|                         | $\pi\cdots\pi(11)$        | 0.0064 | 0.0185         | 0.7635  |



|                                |                         |        |        |        |
|--------------------------------|-------------------------|--------|--------|--------|
|                                | C-H... $\pi$ (12)       | 0.0131 | 0.0490 | 0.8249 |
|                                | C-H... $\pi$ (13)       | 0.0075 | 0.0262 | 0.7194 |
|                                | lone pair... $\pi$ (14) | 0.0075 | 0.0247 | 0.8310 |
|                                | C-H... $\pi$ (15)       | 0.0123 | 0.0474 | 0.8126 |
|                                | C-H... $\pi$ (16)       | 0.0126 | 0.0481 | 0.8163 |
|                                | C-H... $\pi$ (17)       | 0.0075 | 0.0258 | 0.7195 |
|                                | lone pair... $\pi$ (18) | 0.0076 | 0.0250 | 0.8323 |
|                                | C-H... $\pi$ (19)       | 0.0129 | 0.0486 | 0.8246 |
| NDI-CBPQT <sup>2(•+)</sup> (T) | $\pi$ ... $\pi$ (1)     | 0.0064 | 0.0206 | 0.8474 |
|                                | $\pi$ ... $\pi$ (2)     | 0.0071 | 0.0194 | 0.7940 |
|                                | $\pi$ ... $\pi$ (3)     | 0.0078 | 0.0216 | 0.8041 |
|                                | $\pi$ ... $\pi$ (4)     | 0.0059 | 0.0169 | 0.7936 |
|                                | $\pi$ ... $\pi$ (5)     | 0.0078 | 0.0217 | 0.8040 |
|                                | $\pi$ ... $\pi$ (6)     | 0.0071 | 0.0195 | 0.7939 |
|                                | $\pi$ ... $\pi$ (7)     | 0.0064 | 0.0207 | 0.8479 |
|                                | $\pi$ ... $\pi$ (8)     | 0.0064 | 0.0206 | 0.8472 |
|                                | $\pi$ ... $\pi$ (9)     | 0.0071 | 0.0194 | 0.7940 |
|                                | $\pi$ ... $\pi$ (10)    | 0.0079 | 0.0217 | 0.8043 |
|                                | $\pi$ ... $\pi$ (11)    | 0.0059 | 0.0170 | 0.7936 |
|                                | $\pi$ ... $\pi$ (12)    | 0.0078 | 0.0217 | 0.8040 |
|                                | $\pi$ ... $\pi$ (13)    | 0.0071 | 0.0194 | 0.7939 |
|                                | $\pi$ ... $\pi$ (14)    | 0.0064 | 0.0206 | 0.8482 |
|                                | C-H... $\pi$ (15)       | 0.0096 | 0.0335 | 0.7331 |
|                                | C-H... $\pi$ (16)       | 0.0163 | 0.0622 | 0.8525 |
|                                | lone pair... $\pi$ (17) | 0.0079 | 0.0266 | 0.8388 |
|                                | lone pair... $\pi$ (18) | 0.0079 | 0.0264 | 0.8381 |
|                                | C-H... $\pi$ (19)       | 0.0163 | 0.0621 | 0.8536 |
|                                | C-H... $\pi$ (20)       | 0.0094 | 0.0330 | 0.7316 |
| NDI-CBPQT <sup>2(•+)</sup> (S) | $\pi$ ... $\pi$ (1)     | 0.0069 | 0.0200 | 0.7781 |
|                                | $\pi$ ... $\pi$ (2)     | 0.0060 | 0.0201 | 0.7257 |
|                                | $\pi$ ... $\pi$ (3)     | 0.0063 | 0.0188 | 0.7945 |

|                         |                        |        |        |        |
|-------------------------|------------------------|--------|--------|--------|
|                         | $\pi\ldots\pi(4)$      | 0.0064 | 0.0190 | 0.7946 |
|                         | $\pi\ldots\pi(5)$      | 0.0063 | 0.0211 | 0.7304 |
|                         | $\pi\ldots\pi(6)$      | 0.0068 | 0.0195 | 0.7782 |
|                         | $\pi\ldots\pi(7)$      | 0.0070 | 0.0200 | 0.7779 |
|                         | $\pi\ldots\pi(8)$      | 0.0058 | 0.0195 | 0.7253 |
|                         | $\pi\ldots\pi(9)$      | 0.0062 | 0.0186 | 0.7941 |
|                         | $\pi\ldots\pi(10)$     | 0.0063 | 0.0187 | 0.7941 |
|                         | $\pi\ldots\pi(11)$     | 0.0061 | 0.0204 | 0.7296 |
|                         | $\pi\ldots\pi(12)$     | 0.0068 | 0.0196 | 0.7779 |
|                         | C-H... $\pi(13)$       | 0.0125 | 0.0479 | 0.8141 |
|                         | C-H... $\pi(14)$       | 0.0075 | 0.0259 | 0.7213 |
|                         | lone pair... $\pi(15)$ | 0.0074 | 0.0244 | 0.8303 |
|                         | C-H... $\pi(16)$       | 0.0126 | 0.0480 | 0.8147 |
|                         | C-H... $\pi(17)$       | 0.0125 | 0.0477 | 0.8144 |
|                         | C-H... $\pi(18)$       | 0.0077 | 0.0266 | 0.7216 |
|                         | lone pair... $\pi(19)$ | 0.0074 | 0.0244 | 0.8310 |
|                         | C-H... $\pi(20)$       | 0.0125 | 0.0477 | 0.8138 |
| NDI-CBPQT <sup>•+</sup> | $\pi\ldots\pi(1)$      | 0.0063 | 0.0189 | 0.8452 |
|                         | $\pi\ldots\pi(2)$      | 0.0081 | 0.0234 | 0.7583 |
|                         | $\pi\ldots\pi(3)$      | 0.0073 | 0.0227 | 0.7931 |
|                         | $\pi\ldots\pi(4)$      | 0.0106 | 0.0264 | 0.8341 |
|                         | $\pi\ldots\pi(5)$      | 0.0081 | 0.0236 | 0.8718 |
|                         | $\pi\ldots\pi(6)$      | 0.0116 | 0.0310 | 0.8028 |
|                         | $\pi\ldots\pi(7)$      | 0.0073 | 0.0232 | 0.8486 |
|                         | $\pi\ldots\pi(8)$      | 0.0081 | 0.0227 | 0.7861 |
|                         | $\pi\ldots\pi(9)$      | 0.0072 | 0.0207 | 0.8047 |
|                         | $\pi\ldots\pi(10)$     | 0.0058 | 0.0177 | 0.7799 |
|                         | $\pi\ldots\pi(11)$     | 0.0050 | 0.0153 | 0.7379 |
|                         | $\pi\ldots\pi(12)$     | 0.0057 | 0.0165 | 0.7811 |
|                         | C-H... $\pi(13)$       | 0.0103 | 0.0415 | 0.7620 |
|                         | C-H... $\pi(14)$       | 0.0078 | 0.0272 | 0.7235 |
|                         | lone pair... $\pi(15)$ | 0.0074 | 0.0247 | 0.8337 |

|                        |                         |        |        |        |
|------------------------|-------------------------|--------|--------|--------|
|                        | C-H... $\pi$ (16)       | 0.0138 | 0.0495 | 0.8479 |
|                        | C-H... $\pi$ (17)       | 0.0130 | 0.0469 | 0.8364 |
|                        | C-H... $\pi$ (18)       | 0.0064 | 0.0222 | 0.7285 |
|                        | lone pair... $\pi$ (19) | 0.0080 | 0.0266 | 0.8357 |
| NDI-CBPQT <sup>0</sup> | $\pi$ ... $\pi$ (1)     | 0.0075 | 0.0224 | 0.8735 |
|                        | $\pi$ ... $\pi$ (2)     | 0.0104 | 0.0289 | 0.7989 |
|                        | $\pi$ ... $\pi$ (3)     | 0.0092 | 0.0236 | 0.8305 |
|                        | $\pi$ ... $\pi$ (4)     | 0.0065 | 0.0186 | 0.8620 |
|                        | $\pi$ ... $\pi$ (5)     | 0.0071 | 0.0212 | 0.7995 |
|                        | $\pi$ ... $\pi$ (6)     | 0.0064 | 0.0193 | 0.7616 |
|                        | $\pi$ ... $\pi$ (7)     | 0.0057 | 0.0178 | 0.7894 |
|                        | $\pi$ ... $\pi$ (8)     | 0.0056 | 0.0176 | 0.7892 |
|                        | $\pi$ ... $\pi$ (9)     | 0.0064 | 0.0189 | 0.7591 |
|                        | $\pi$ ... $\pi$ (10)    | 0.0070 | 0.0210 | 0.7991 |
|                        | $\pi$ ... $\pi$ (11)    | 0.0092 | 0.0235 | 0.8294 |
|                        | $\pi$ ... $\pi$ (12)    | 0.0075 | 0.0222 | 0.8731 |
|                        | $\pi$ ... $\pi$ (13)    | 0.0103 | 0.0286 | 0.7989 |
|                        | C-H... $\pi$ (14)       | 0.0133 | 0.0476 | 0.8394 |
|                        | lone pair... $\pi$ (15) | 0.0084 | 0.0280 | 0.8458 |
|                        | C-H... $\pi$ (16)       | 0.0067 | 0.0233 | 0.7292 |
|                        | lone pair... $\pi$ (17) | 0.0083 | 0.0275 | 0.8449 |
|                        | C-H... $\pi$ (18)       | 0.0067 | 0.0233 | 0.7297 |
|                        | C-H... $\pi$ (19)       | 0.0133 | 0.0477 | 0.8393 |

Table S3. AIM analysis results of the intermolecular interactions in the TTF-CBPQT<sup>n+</sup> complexes (a.u.)

|                                | Types                     | $\rho$ | $\nabla^2\rho$ | $ V /G$ |
|--------------------------------|---------------------------|--------|----------------|---------|
| TTF-CBPQT <sup>4+</sup>        | $\pi\ldots\pi(1)$         | 0.0100 | 0.0281         | 0.7547  |
|                                | $\pi\ldots\pi(2)$         | 0.0041 | 0.0104         | 0.7342  |
|                                | $\pi\ldots\pi(3)$         | 0.0037 | 0.0093         | 0.7259  |
|                                | $\pi\ldots\pi(4)$         | 0.0100 | 0.0284         | 0.7566  |
|                                | $\pi\ldots\pi(5)$         | 0.0100 | 0.0284         | 0.7563  |
|                                | $\pi\ldots\pi(6)$         | 0.0038 | 0.0096         | 0.7269  |
|                                | $\pi\ldots\pi(7)$         | 0.0042 | 0.0106         | 0.7345  |
|                                | $\pi\ldots\pi(8)$         | 0.0100 | 0.0282         | 0.7548  |
|                                | lone pair $\ldots\pi(9)$  | 0.0035 | 0.0108         | 0.6847  |
|                                | lone pair $\ldots\pi(10)$ | 0.0055 | 0.0176         | 0.7425  |
|                                | lone pair $\ldots\pi(11)$ | 0.0035 | 0.0108         | 0.6848  |
|                                | lone pair $\ldots\pi(12)$ | 0.0055 | 0.0175         | 0.7427  |
| TTF-CBPQT <sup>3+</sup>        | $\pi\ldots\pi(1)$         | 0.0036 | 0.0106         | 0.7209  |
|                                | $\pi\ldots\pi(2)$         | 0.0060 | 0.0184         | 0.7757  |
|                                | $\pi\ldots\pi(3)$         | 0.0061 | 0.0186         | 0.7743  |
|                                | $\pi\ldots\pi(4)$         | 0.0039 | 0.0113         | 0.7403  |
|                                | $\pi\ldots\pi(5)$         | 0.0057 | 0.0166         | 0.7706  |
|                                | $\pi\ldots\pi(6)$         | 0.0070 | 0.0238         | 0.7118  |
|                                | $\pi\ldots\pi(7)$         | 0.0079 | 0.0221         | 0.7738  |
|                                | $\pi\ldots\pi(8)$         | 0.0046 | 0.0116         | 0.7420  |
|                                | lone pair $\ldots\pi(9)$  | 0.0056 | 0.0177         | 0.7397  |
|                                | lone pair $\ldots\pi(10)$ | 0.0018 | 0.0055         | 0.6315  |
|                                | lone pair $\ldots\pi(11)$ | 0.0040 | 0.0126         | 0.7162  |
|                                | lone pair $\ldots\pi(12)$ | 0.0033 | 0.0101         | 0.6833  |
| TTF-CBPQT <sup>2(++)</sup> (T) | $\pi\ldots\pi(1)$         | 0.0079 | 0.0225         | 0.7854  |
|                                | $\pi\ldots\pi(2)$         | 0.0055 | 0.0149         | 0.7538  |
|                                | $\pi\ldots\pi(3)$         | 0.0051 | 0.0144         | 0.8296  |
|                                | $\pi\ldots\pi(4)$         | 0.0052 | 0.0140         | 0.7551  |
|                                | $\pi\ldots\pi(5)$         | 0.0079 | 0.0223         | 0.7854  |

|                                |                        |        |        |        |
|--------------------------------|------------------------|--------|--------|--------|
|                                | $\pi\ldots\pi(6)$      | 0.0079 | 0.0224 | 0.7855 |
|                                | $\pi\ldots\pi(7)$      | 0.0052 | 0.0140 | 0.7550 |
|                                | $\pi\ldots\pi(8)$      | 0.0051 | 0.0144 | 0.8297 |
|                                | $\pi\ldots\pi(9)$      | 0.0055 | 0.0150 | 0.7537 |
|                                | $\pi\ldots\pi(10)$     | 0.0079 | 0.0225 | 0.7854 |
|                                | lone pair... $\pi(11)$ | 0.0078 | 0.0264 | 0.7784 |
|                                | lone pair... $\pi(12)$ | 0.0078 | 0.0263 | 0.7774 |
|                                | lone pair... $\pi(13)$ | 0.0078 | 0.0263 | 0.7773 |
|                                | lone pair... $\pi(14)$ | 0.0078 | 0.0264 | 0.7784 |
| TTF-CBPQT <sup>2(•+)</sup> (S) | $\pi\ldots\pi(1)$      | 0.0044 | 0.0138 | 0.7190 |
|                                | $\pi\ldots\pi(2)$      | 0.0056 | 0.0170 | 0.7688 |
|                                | $\pi\ldots\pi(3)$      | 0.0056 | 0.0172 | 0.7696 |
|                                | $\pi\ldots\pi(4)$      | 0.0045 | 0.0141 | 0.7197 |
|                                | $\pi\ldots\pi(5)$      | 0.0047 | 0.0131 | 0.7574 |
|                                | $\pi\ldots\pi(6)$      | 0.0056 | 0.0174 | 0.7733 |
|                                | $\pi\ldots\pi(7)$      | 0.0050 | 0.0148 | 0.7858 |
|                                | $\pi\ldots\pi(8)$      | 0.0050 | 0.0146 | 0.7882 |
|                                | $\pi\ldots\pi(9)$      | 0.0055 | 0.0164 | 0.7804 |
|                                | $\pi\ldots\pi(10)$     | 0.0047 | 0.0131 | 0.7584 |
|                                | lone pair... $\pi(11)$ | 0.0017 | 0.0053 | 0.6304 |
|                                | lone pair... $\pi(12)$ | 0.0053 | 0.0164 | 0.7357 |
|                                | lone pair... $\pi(13)$ | 0.0019 | 0.0059 | 0.6439 |
|                                | lone pair... $\pi(14)$ | 0.0051 | 0.0158 | 0.7347 |
| TTF-CBPQT <sup>•+</sup>        | $\pi\ldots\pi(1)$      | 0.0052 | 0.0141 | 0.7703 |
|                                | $\pi\ldots\pi(2)$      | 0.0058 | 0.0182 | 0.7756 |
|                                | $\pi\ldots\pi(3)$      | 0.0055 | 0.0160 | 0.7984 |
|                                | $\pi\ldots\pi(4)$      | 0.0046 | 0.0128 | 0.7597 |
|                                | $\pi\ldots\pi(5)$      | 0.0057 | 0.0166 | 0.7847 |
|                                | $\pi\ldots\pi(6)$      | 0.0046 | 0.0141 | 0.7205 |
|                                | $\pi\ldots\pi(7)$      | 0.0056 | 0.0169 | 0.7718 |
|                                | $\pi\ldots\pi(8)$      | 0.0042 | 0.0132 | 0.7189 |

|                        |                        |        |        |        |
|------------------------|------------------------|--------|--------|--------|
| TTF-CBPQT <sup>0</sup> | $\pi\ldots\pi(9)$      | 0.0058 | 0.0173 | 0.7810 |
|                        | lone pair... $\pi(10)$ | 0.0048 | 0.0149 | 0.7304 |
|                        | lone pair... $\pi(11)$ | 0.0022 | 0.0065 | 0.6617 |
|                        | lone pair... $\pi(12)$ | 0.0060 | 0.0189 | 0.7476 |
|                        | lone pair... $\pi(13)$ | 0.0018 | 0.0054 | 0.6434 |
|                        | $\pi\ldots\pi(1)$      | 0.0060 | 0.0193 | 0.7763 |
|                        | $\pi\ldots\pi(2)$      | 0.0052 | 0.0168 | 0.7295 |
|                        | $\pi\ldots\pi(3)$      | 0.0062 | 0.0196 | 0.7757 |
|                        | $\pi\ldots\pi(4)$      | 0.0047 | 0.0141 | 0.8020 |
|                        | $\pi\ldots\pi(5)$      | 0.0047 | 0.0139 | 0.8133 |
|                        | $\pi\ldots\pi(6)$      | 0.0048 | 0.0156 | 0.7184 |
|                        | $\pi\ldots\pi(7)$      | 0.0059 | 0.0181 | 0.7811 |
|                        | $\pi\ldots\pi(8)$      | 0.0023 | 0.0060 | 0.7339 |
|                        | $\pi\ldots\pi(9)$      | 0.0052 | 0.0153 | 0.8012 |
|                        | $\pi\ldots\pi(10)$     | 0.0045 | 0.0142 | 0.7621 |
|                        | $\pi\ldots\pi(11)$     | 0.0062 | 0.0182 | 0.8069 |
|                        | $\pi\ldots\pi(12)$     | 0.0045 | 0.0145 | 0.7628 |
|                        | $\pi\ldots\pi(13)$     | 0.0047 | 0.0129 | 0.7858 |
|                        | $\pi\ldots\pi(14)$     | 0.0024 | 0.0062 | 0.7392 |
|                        | lone pair... $\pi(15)$ | 0.0049 | 0.0155 | 0.7358 |
|                        | lone pair... $\pi(16)$ | 0.0021 | 0.0062 | 0.6614 |
|                        | lone pair... $\pi(17)$ | 0.0058 | 0.0185 | 0.7496 |
|                        | lone pair... $\pi(18)$ | 0.0019 | 0.0057 | 0.6547 |



Table S4. The  $D_0$ ,  $\Delta G^{\text{TOT}}$  and  $\Delta G^{\text{ZPE+GEO}}$  values of the  $\text{BIPY}^{2+}\text{-CBPQT}^{\text{n}+}$  complexes (kcal/mol)

|                             | $\text{BIPY}^{2+}\text{-CBPQT}^{4+}$ | $\text{BIPY}^{2+}\text{-CBPQT}^{\bullet 3+}$ | $\text{BIPY}^{2+}\text{-CBPQT}^{2(\bullet+)}(\text{T})$ | $\text{BIPY}^{2+}\text{-CBPQT}^{2(\bullet+)}(\text{S})$ | $\text{BIPY}^{2+}\text{-CBPQT}^{\bullet+}$ | $\text{BIPY}^{2+}\text{-CBPQT}^0$ |
|-----------------------------|--------------------------------------|----------------------------------------------|---------------------------------------------------------|---------------------------------------------------------|--------------------------------------------|-----------------------------------|
| $\Delta G^{\text{TOT}}$     | -0.53                                | -22.72                                       | -35.09                                                  | -35.30                                                  | -77.90                                     | -82.06                            |
| $\Delta G^{\text{ZPE+GEO}}$ | 4.03                                 | 5.76                                         | 9.46                                                    | 9.59                                                    | 33.98                                      | 31.81                             |
| $D_0$                       |                                      | 16.96                                        | 25.63                                                   | 25.71                                                   | 43.92                                      | 50.25                             |

Table S5. The  $D_0$ ,  $\Delta G^{\text{TOT}}$  and  $\Delta G^{\text{ZPE+GEO}}$  values of the NDI-CBPQT<sup>n+</sup> complexes (kcal/mol)

|                             | NDI-CBPQT <sup>4+</sup> | NDI-CBPQT <sup>•3+</sup> | NDI-CBPQT <sup>2(•+)</sup> (T) | NDI-CBPQT <sup>2(•+)</sup> (S) | NDI-CBPQT <sup>•+</sup> | NDI-CBPQT <sup>0</sup> |
|-----------------------------|-------------------------|--------------------------|--------------------------------|--------------------------------|-------------------------|------------------------|
| $\Delta G^{\text{TOT}}$     | -34.20                  | -35.46                   | -31.56                         | -35.86                         | -44.80                  | -45.31                 |
| $\Delta G^{\text{ZPE+GEO}}$ | 15.06                   | 10.38                    | 9.02                           | 6.83                           | 14.60                   | 16.48                  |
| $D_0$                       | 19.14                   | 25.08                    | 22.54                          | 29.03                          | 30.20                   | 28.83                  |

Table S6. The  $D_0$ ,  $\Delta G^{\text{TOT}}$  and  $\Delta G^{\text{ZPE+GEO}}$  values of the TTF-CBPQT<sup>n+</sup> complexes (kcal/mol)

|                             | TTF-CBPQT <sup>4+</sup> | TTF-CBPQT <sup>3+</sup> | TTF-CBPQT <sup>2(•+)</sup> (T) | TTF-CBPQT <sup>2(•+)</sup> (S) | TTF-CBPQT <sup>•+</sup> | TTF-CBPQT <sup>0</sup> |
|-----------------------------|-------------------------|-------------------------|--------------------------------|--------------------------------|-------------------------|------------------------|
| $\Delta G^{\text{TOT}}$     | -36.78                  | -33.10                  | -27.34                         | -28.06                         | -26.83                  | -23.31                 |
| $\Delta G^{\text{ZPE+GEO}}$ | 11.84                   | 7.99                    | 3.82                           | 3.46                           | 4.59                    | 4.44                   |
| $D_0$                       | 24.94                   | 25.11                   | 23.52                          | 24.60                          | 22.24                   | 18.87                  |

Table S7. AIM analysis results of the intermolecular interactions in the BIPY<sup>2+</sup>-CBPQT<sup>n+</sup> complexes (a.u.)

|                                         | Types               | $\rho$ | $\nabla^2\rho$ | $ V /G$ |
|-----------------------------------------|---------------------|--------|----------------|---------|
| BIPY <sup>2+</sup> -CBPQT <sup>4+</sup> | $\pi\cdots\pi(1)$   | 0.0068 | 0.0187         | 0.7831  |
|                                         | $\pi\cdots\pi(2)$   | 0.0027 | 0.0081         | 0.7402  |
|                                         | $\pi\cdots\pi(3)$   | 0.0024 | 0.0075         | 0.7339  |
|                                         | $\pi\cdots\pi(4)$   | 0.0070 | 0.0194         | 0.7836  |
|                                         | $\pi\cdots\pi(5)$   | 0.0069 | 0.0193         | 0.7833  |
|                                         | $\pi\cdots\pi(6)$   | 0.0029 | 0.0087         | 0.7481  |
|                                         | $\pi\cdots\pi(7)$   | 0.0027 | 0.0081         | 0.7407  |
|                                         | $\pi\cdots\pi(8)$   | 0.0071 | 0.0197         | 0.7856  |
|                                         | C-H $\cdots\pi(9)$  | 0.0041 | 0.0142         | 0.7257  |
|                                         | C-H $\cdots\pi(10)$ | 0.0034 | 0.0123         | 0.7199  |
|                                         | C-H $\cdots\pi(11)$ | 0.0058 | 0.0178         | 0.7234  |
|                                         | C-H $\cdots\pi(12)$ | 0.0053 | 0.0163         | 0.7154  |
|                                         | C-H $\cdots\pi(13)$ | 0.0035 | 0.0120         | 0.7116  |
|                                         | C-H $\cdots\pi(14)$ | 0.0019 | 0.0069         | 0.6509  |
| BIPY <sup>2+</sup> -CBPQT <sup>3+</sup> | $\pi\cdots\pi(1)$   | 0.0073 | 0.0192         | 0.8050  |
|                                         | $\pi\cdots\pi(2)$   | 0.0063 | 0.0175         | 0.7928  |
|                                         | $\pi\cdots\pi(3)$   | 0.0068 | 0.0171         | 0.8136  |
|                                         | $\pi\cdots\pi(4)$   | 0.0064 | 0.0181         | 0.7896  |
|                                         | $\pi\cdots\pi(5)$   | 0.0072 | 0.0190         | 0.8040  |
|                                         | $\pi\cdots\pi(6)$   | 0.0051 | 0.0136         | 0.7810  |
|                                         | $\pi\cdots\pi(7)$   | 0.0061 | 0.0174         | 0.7780  |
|                                         | $\pi\cdots\pi(8)$   | 0.0049 | 0.0137         | 0.7808  |
|                                         | $\pi\cdots\pi(9)$   | 0.0068 | 0.0199         | 0.7752  |
|                                         | $\pi\cdots\pi(10)$  | 0.0043 | 0.0118         | 0.7725  |
|                                         | C-H $\cdots\pi(11)$ | 0.0034 | 0.0105         | 0.6811  |
|                                         | C-H $\cdots\pi(12)$ | 0.0051 | 0.0167         | 0.7277  |
|                                         | C-H $\cdots\pi(13)$ | 0.0030 | 0.0103         | 0.6808  |
|                                         | C-H $\cdots\pi(14)$ | 0.0049 | 0.0155         | 0.7192  |
|                                         | C-H $\cdots\pi(15)$ | 0.0022 | 0.0071         | 0.6359  |

|                                                |                     |        |        |        |
|------------------------------------------------|---------------------|--------|--------|--------|
| BIPY <sup>•+</sup> -CBPQT <sup>2(•+)</sup> (T) | $\pi\ldots\pi(1)$   | 0.0072 | 0.0188 | 0.8054 |
|                                                | $\pi\ldots\pi(2)$   | 0.0056 | 0.0157 | 0.7891 |
|                                                | $\pi\ldots\pi(3)$   | 0.0067 | 0.0167 | 0.8137 |
|                                                | $\pi\ldots\pi(4)$   | 0.0056 | 0.0156 | 0.7894 |
|                                                | $\pi\ldots\pi(5)$   | 0.0074 | 0.0192 | 0.8046 |
|                                                | $\pi\ldots\pi(6)$   | 0.0074 | 0.0192 | 0.8045 |
|                                                | $\pi\ldots\pi(7)$   | 0.0056 | 0.0156 | 0.7894 |
|                                                | $\pi\ldots\pi(8)$   | 0.0067 | 0.0167 | 0.8137 |
|                                                | $\pi\ldots\pi(9)$   | 0.0056 | 0.0156 | 0.7891 |
|                                                | $\pi\ldots\pi(10)$  | 0.0072 | 0.0188 | 0.8054 |
|                                                | C-H $\ldots\pi(11)$ | 0.0024 | 0.0074 | 0.6452 |
|                                                | C-H $\ldots\pi(12)$ | 0.0042 | 0.0144 | 0.7283 |
|                                                | C-H $\ldots\pi(13)$ | 0.0054 | 0.0180 | 0.7002 |
|                                                | C-H $\ldots\pi(14)$ | 0.0054 | 0.0180 | 0.7004 |
|                                                | C-H $\ldots\pi(15)$ | 0.0042 | 0.0144 | 0.7285 |
|                                                | C-H $\ldots\pi(16)$ | 0.0024 | 0.0074 | 0.6457 |
| BIPY <sup>•+</sup> -CBPQT <sup>2(•+)</sup> (S) | $\pi\ldots\pi(1)$   | 0.0076 | 0.0198 | 0.8059 |
|                                                | $\pi\ldots\pi(2)$   | 0.0056 | 0.0154 | 0.7912 |
|                                                | $\pi\ldots\pi(3)$   | 0.0071 | 0.0174 | 0.8130 |
|                                                | $\pi\ldots\pi(4)$   | 0.0062 | 0.0175 | 0.7882 |
|                                                | $\pi\ldots\pi(5)$   | 0.0075 | 0.0197 | 0.8048 |
|                                                | $\pi\ldots\pi(6)$   | 0.0057 | 0.0155 | 0.7946 |
|                                                | $\pi\ldots\pi(7)$   | 0.0049 | 0.0138 | 0.7872 |
|                                                | $\pi\ldots\pi(8)$   | 0.0052 | 0.0155 | 0.7943 |
|                                                | $\pi\ldots\pi(9)$   | 0.0037 | 0.0109 | 0.7705 |
|                                                | $\pi\ldots\pi(10)$  | 0.0059 | 0.0149 | 0.8108 |
|                                                | C-H $\ldots\pi(11)$ | 0.0028 | 0.0085 | 0.6608 |
|                                                | C-H $\ldots\pi(12)$ | 0.0048 | 0.0162 | 0.7277 |
|                                                | C-H $\ldots\pi(13)$ | 0.0045 | 0.0152 | 0.6874 |
|                                                | C-H $\ldots\pi(14)$ | 0.0038 | 0.0134 | 0.7239 |
|                                                | C-H $\ldots\pi(15)$ | 0.0070 | 0.0235 | 0.7244 |

|                                         |                     |        |        |        |
|-----------------------------------------|---------------------|--------|--------|--------|
| BIPY <sup>•+</sup> -CBPQT <sup>•+</sup> | $\pi\ldots\pi(1)$   | 0.0078 | 0.0202 | 0.8055 |
|                                         | $\pi\ldots\pi(2)$   | 0.0060 | 0.0168 | 0.7919 |
|                                         | $\pi\ldots\pi(3)$   | 0.0072 | 0.0175 | 0.8141 |
|                                         | $\pi\ldots\pi(4)$   | 0.0060 | 0.0168 | 0.7919 |
|                                         | $\pi\ldots\pi(5)$   | 0.0078 | 0.0199 | 0.8050 |
|                                         | $\pi\ldots\pi(6)$   | 0.0075 | 0.0197 | 0.8115 |
|                                         | $\pi\ldots\pi(7)$   | 0.0050 | 0.0140 | 0.7925 |
|                                         | $\pi\ldots\pi(8)$   | 0.0071 | 0.0175 | 0.8297 |
|                                         | $\pi\ldots\pi(9)$   | 0.0051 | 0.0142 | 0.7927 |
|                                         | $\pi\ldots\pi(10)$  | 0.0074 | 0.0195 | 0.8118 |
|                                         | C-H $\ldots\pi(11)$ | 0.0028 | 0.0085 | 0.6666 |
|                                         | C-H $\ldots\pi(12)$ | 0.0044 | 0.0154 | 0.7315 |
|                                         | C-H $\ldots\pi(13)$ | 0.0056 | 0.0187 | 0.7047 |
|                                         | C-H $\ldots\pi(14)$ | 0.0056 | 0.0189 | 0.7054 |
|                                         | C-H $\ldots\pi(15)$ | 0.0044 | 0.0154 | 0.7314 |
|                                         | C-H $\ldots\pi(16)$ | 0.0028 | 0.0085 | 0.6657 |
| BIPY <sup>•+</sup> -CBPQT <sup>0</sup>  | $\pi\ldots\pi(1)$   | 0.0057 | 0.0143 | 0.8251 |
|                                         | $\pi\ldots\pi(2)$   | 0.0063 | 0.0184 | 0.8012 |
|                                         | $\pi\ldots\pi(3)$   | 0.0058 | 0.0188 | 0.7382 |
|                                         | $\pi\ldots\pi(4)$   | 0.0069 | 0.0205 | 0.7914 |
|                                         | $\pi\ldots\pi(5)$   | 0.0069 | 0.0205 | 0.7923 |
|                                         | $\pi\ldots\pi(6)$   | 0.0059 | 0.0189 | 0.7375 |
|                                         | $\pi\ldots\pi(7)$   | 0.0063 | 0.0185 | 0.8011 |
|                                         | $\pi\ldots\pi(8)$   | 0.0057 | 0.0142 | 0.8243 |
|                                         | C-H $\ldots\pi(9)$  | 0.0054 | 0.0054 | 0.7027 |
|                                         | C-H $\ldots\pi(10)$ | 0.0034 | 0.0101 | 0.6879 |
|                                         | C-H $\ldots\pi(11)$ | 0.0043 | 0.0150 | 0.7325 |
|                                         | C-H $\ldots\pi(12)$ | 0.0043 | 0.0150 | 0.7323 |
|                                         | C-H $\ldots\pi(13)$ | 0.0034 | 0.0101 | 0.6876 |
|                                         | C-H $\ldots\pi(14)$ | 0.0054 | 0.0178 | 0.7022 |



Table S8. AIM analysis results of the intermolecular interactions in the NDI<sup>•-</sup>-CBPQT<sup>n+</sup> complexes (a.u.)

|                                        | Types                     | $\rho$ | $\nabla^2\rho$ | $ V /G$ |
|----------------------------------------|---------------------------|--------|----------------|---------|
| NDI <sup>•-</sup> -CBPQT <sup>4+</sup> | $\pi\cdots\pi(1)$         | 0.0059 | 0.0230         | 0.7467  |
|                                        | $\pi\cdots\pi(2)$         | 0.0082 | 0.0227         | 0.7854  |
|                                        | $\pi\cdots\pi(3)$         | 0.0098 | 0.0297         | 0.8022  |
|                                        | $\pi\cdots\pi(4)$         | 0.0053 | 0.0152         | 0.7963  |
|                                        | $\pi\cdots\pi(5)$         | 0.0080 | 0.0224         | 0.7988  |
|                                        | $\pi\cdots\pi(6)$         | 0.0059 | 0.0170         | 0.7839  |
|                                        | $\pi\cdots\pi(7)$         | 0.0062 | 0.0189         | 0.8568  |
|                                        | $\pi\cdots\pi(8)$         | 0.0062 | 0.0189         | 0.8575  |
|                                        | $\pi\cdots\pi(9)$         | 0.0058 | 0.0168         | 0.7839  |
|                                        | $\pi\cdots\pi(10)$        | 0.0082 | 0.0228         | 0.7990  |
|                                        | $\pi\cdots\pi(11)$        | 0.0054 | 0.0152         | 0.7972  |
|                                        | $\pi\cdots\pi(12)$        | 0.0097 | 0.0293         | 0.8036  |
|                                        | $\pi\cdots\pi(13)$        | 0.0084 | 0.0230         | 0.7839  |
|                                        | $\pi\cdots\pi(14)$        | 0.0059 | 0.0227         | 0.7515  |
|                                        | C-H $\cdots\pi(15)$       | 0.0171 | 0.0628         | 0.8609  |
|                                        | lone pair $\cdots\pi(16)$ | 0.0085 | 0.0284         | 0.8410  |
|                                        | C-H $\cdots\pi(17)$       | 0.0091 | 0.0317         | 0.7342  |
|                                        | C-H $\cdots\pi(18)$       | 0.0086 | 0.0302         | 0.7309  |
|                                        | lone pair $\cdots\pi(19)$ | 0.0088 | 0.0296         | 0.8430  |
|                                        | C-H $\cdots\pi(20)$       | 0.0171 | 0.0624         | 0.8652  |
| NDI <sup>•-</sup> -CBPQT <sup>3+</sup> | $\pi\cdots\pi(1)$         | 0.0080 | 0.0222         | 0.8858  |
|                                        | $\pi\cdots\pi(2)$         | 0.0094 | 0.0253         | 0.8094  |
|                                        | $\pi\cdots\pi(3)$         | 0.0085 | 0.0224         | 0.8255  |
|                                        | $\pi\cdots\pi(4)$         | 0.0076 | 0.0236         | 0.7971  |
|                                        | $\pi\cdots\pi(5)$         | 0.0086 | 0.0258         | 0.7973  |
|                                        | $\pi\cdots\pi(6)$         | 0.0114 | 0.0323         | 0.7954  |
|                                        | $\pi\cdots\pi(7)$         | 0.0067 | 0.0216         | 0.8326  |
|                                        | $\pi\cdots\pi(8)$         | 0.0074 | 0.0275         | 0.8072  |
|                                        | $\pi\cdots\pi(9)$         | 0.0081 | 0.0297         | 0.7921  |

|                                               |                           |        |        |        |
|-----------------------------------------------|---------------------------|--------|--------|--------|
|                                               | $\pi\cdots\pi(10)$        | 0.0090 | 0.0314 | 0.8223 |
|                                               | $\pi\cdots\pi(11)$        | 0.0076 | 0.0197 | 0.7883 |
|                                               | $\pi\cdots\pi(12)$        | 0.0090 | 0.0269 | 0.8049 |
|                                               | $\pi\cdots\pi(13)$        | 0.0076 | 0.0241 | 0.7801 |
|                                               | $\pi\cdots\pi(14)$        | 0.0077 | 0.0218 | 0.7793 |
|                                               | C-H $\cdots\pi(15)$       | 0.0099 | 0.0352 | 0.7469 |
|                                               | lone pair $\cdots\pi(16)$ | 0.0090 | 0.0306 | 0.8599 |
|                                               | C-H $\cdots\pi(17)$       | 0.0188 | 0.0659 | 0.8960 |
|                                               | lone pair $\cdots\pi(18)$ | 0.0063 | 0.0220 | 0.8172 |
|                                               | C-H $\cdots\pi(19)$       | 0.0182 | 0.0647 | 0.8737 |
|                                               | C-H $\cdots\pi(20)$       | 0.0101 | 0.0354 | 0.7403 |
| NDI <sup>•-</sup> -CBPQT <sup>2(•+)</sup> (T) | $\pi\cdots\pi(1)$         | 0.0067 | 0.0196 | 0.7924 |
|                                               | $\pi\cdots\pi(2)$         | 0.0062 | 0.0190 | 0.7484 |
|                                               | $\pi\cdots\pi(3)$         | 0.0061 | 0.0191 | 0.7832 |
|                                               | $\pi\cdots\pi(4)$         | 0.0077 | 0.0216 | 0.8166 |
|                                               | $\pi\cdots\pi(5)$         | 0.0070 | 0.0218 | 0.8382 |
|                                               | $\pi\cdots\pi(6)$         | 0.0089 | 0.0239 | 0.7938 |
|                                               | $\pi\cdots\pi(7)$         | 0.0088 | 0.0237 | 0.7943 |
|                                               | $\pi\cdots\pi(8)$         | 0.0071 | 0.0222 | 0.8400 |
|                                               | $\pi\cdots\pi(9)$         | 0.0078 | 0.0217 | 0.8176 |
|                                               | $\pi\cdots\pi(10)$        | 0.0062 | 0.0192 | 0.7820 |
|                                               | $\pi\cdots\pi(11)$        | 0.0062 | 0.0191 | 0.7449 |
|                                               | $\pi\cdots\pi(12)$        | 0.0068 | 0.0198 | 0.7921 |
|                                               | C-H $\cdots\pi(13)$       | 0.0108 | 0.0428 | 0.7689 |
|                                               | lone pair $\cdots\pi(14)$ | 0.0077 | 0.0256 | 0.8321 |
|                                               | C-H $\cdots\pi(15)$       | 0.0073 | 0.0254 | 0.7272 |
|                                               | C-H $\cdots\pi(16)$       | 0.0134 | 0.0489 | 0.8396 |
|                                               | C-H $\cdots\pi(17)$       | 0.0136 | 0.0494 | 0.8420 |
|                                               | lone pair $\cdots\pi(18)$ | 0.0077 | 0.0255 | 0.8316 |
|                                               | C-H $\cdots\pi(19)$       | 0.0072 | 0.0250 | 0.7276 |
|                                               | C-H $\cdots\pi(20)$       | 0.0108 | 0.0430 | 0.7682 |

|                                               |                           |        |        |        |
|-----------------------------------------------|---------------------------|--------|--------|--------|
| NDI <sup>•-</sup> -CBPQT <sup>2(•+)</sup> (S) | $\pi\ldots\pi(1)$         | 0.0077 | 0.0212 | 0.7974 |
|                                               | $\pi\ldots\pi(2)$         | 0.0061 | 0.0205 | 0.7417 |
|                                               | $\pi\ldots\pi(3)$         | 0.0065 | 0.0190 | 0.8069 |
|                                               | $\pi\ldots\pi(4)$         | 0.0067 | 0.0193 | 0.8081 |
|                                               | $\pi\ldots\pi(5)$         | 0.0060 | 0.0206 | 0.7370 |
|                                               | $\pi\ldots\pi(6)$         | 0.0079 | 0.0215 | 0.7976 |
|                                               | $\pi\ldots\pi(7)$         | 0.0081 | 0.0221 | 0.7980 |
|                                               | $\pi\ldots\pi(8)$         | 0.0063 | 0.0214 | 0.7406 |
|                                               | $\pi\ldots\pi(9)$         | 0.0069 | 0.0199 | 0.8098 |
|                                               | $\pi\ldots\pi(10)$        | 0.0068 | 0.0195 | 0.8074 |
|                                               | $\pi\ldots\pi(11)$        | 0.0061 | 0.0207 | 0.7382 |
|                                               | $\pi\ldots\pi(12)$        | 0.0080 | 0.0218 | 0.7978 |
|                                               | C-H $\ldots\pi(13)$       | 0.0124 | 0.0477 | 0.8125 |
|                                               | C-H $\ldots\pi(14)$       | 0.0074 | 0.0256 | 0.7283 |
|                                               | lone pair $\ldots\pi(15)$ | 0.0079 | 0.0263 | 0.8338 |
|                                               | C-H $\ldots\pi(16)$       | 0.0127 | 0.0483 | 0.8186 |
|                                               | C-H $\ldots\pi(17)$       | 0.0126 | 0.0478 | 0.8171 |
|                                               | C-H $\ldots\pi(18)$       | 0.0073 | 0.0255 | 0.7278 |
|                                               | lone pair $\ldots\pi(19)$ | 0.0075 | 0.0250 | 0.8291 |
|                                               | C-H $\ldots\pi(20)$       | 0.0123 | 0.0471 | 0.8095 |
| NDI <sup>•-</sup> -CBPQT <sup>•+</sup>        | $\pi\ldots\pi(1)$         | 0.0060 | 0.0179 | 0.8689 |
|                                               | $\pi\ldots\pi(2)$         | 0.0062 | 0.0172 | 0.8162 |
|                                               | $\pi\ldots\pi(3)$         | 0.0074 | 0.0192 | 0.8283 |
|                                               | $\pi\ldots\pi(4)$         | 0.0057 | 0.0156 | 0.8276 |
|                                               | $\pi\ldots\pi(5)$         | 0.0067 | 0.0205 | 0.7955 |
|                                               | $\pi\ldots\pi(6)$         | 0.0092 | 0.0267 | 0.8137 |
|                                               | $\pi\ldots\pi(7)$         | 0.0081 | 0.0246 | 0.8019 |
|                                               | $\pi\ldots\pi(8)$         | 0.0046 | 0.0172 | 0.7603 |
|                                               | $\pi\ldots\pi(9)$         | 0.0089 | 0.0270 | 0.7865 |
|                                               | $\pi\ldots\pi(10)$        | 0.0096 | 0.0274 | 0.8063 |
|                                               | $\pi\ldots\pi(11)$        | 0.0065 | 0.0205 | 0.7844 |

|                                       |                           |        |        |        |
|---------------------------------------|---------------------------|--------|--------|--------|
|                                       | $\pi\cdots\pi(12)$        | 0.0061 | 0.0167 | 0.8163 |
|                                       | $\pi\cdots\pi(13)$        | 0.0074 | 0.0196 | 0.8130 |
|                                       | $\pi\cdots\pi(14)$        | 0.0060 | 0.0171 | 0.8004 |
|                                       | $\pi\cdots\pi(15)$        | 0.0058 | 0.0174 | 0.8599 |
|                                       | lone pair $\cdots\pi(16)$ | 0.0077 | 0.0260 | 0.8366 |
|                                       | C-H $\cdots\pi(17)$       | 0.0092 | 0.0319 | 0.7485 |
|                                       | C-H $\cdots\pi(18)$       | 0.0171 | 0.0627 | 0.8604 |
|                                       | C-H $\cdots\pi(19)$       | 0.0101 | 0.0353 | 0.7630 |
|                                       | C-H $\cdots\pi(20)$       | 0.0176 | 0.0634 | 0.8744 |
|                                       | lone pair $\cdots\pi(21)$ | 0.0076 | 0.0259 | 0.8389 |
| NDI <sup>•-</sup> -CBPQT <sup>0</sup> | $\pi\cdots\pi(1)$         | 0.0084 | 0.0224 | 0.8096 |
|                                       | $\pi\cdots\pi(2)$         | 0.0064 | 0.0196 | 0.8574 |
|                                       | $\pi\cdots\pi(3)$         | 0.0074 | 0.0196 | 0.8350 |
|                                       | $\pi\cdots\pi(4)$         | 0.0061 | 0.0181 | 0.7975 |
|                                       | $\pi\cdots\pi(5)$         | 0.0055 | 0.0172 | 0.7514 |
|                                       | $\pi\cdots\pi(6)$         | 0.0058 | 0.0170 | 0.7964 |
|                                       | $\pi\cdots\pi(7)$         | 0.0058 | 0.0169 | 0.7968 |
|                                       | $\pi\cdots\pi(8)$         | 0.0055 | 0.0168 | 0.7551 |
|                                       | $\pi\cdots\pi(9)$         | 0.0060 | 0.0181 | 0.7970 |
|                                       | $\pi\cdots\pi(10)$        | 0.0074 | 0.0196 | 0.8336 |
|                                       | $\pi\cdots\pi(11)$        | 0.0064 | 0.0194 | 0.8555 |
|                                       | $\pi\cdots\pi(12)$        | 0.0084 | 0.0225 | 0.8092 |
|                                       | C-H $\cdots\pi(13)$       | 0.0140 | 0.0505 | 0.8432 |
|                                       | C-H $\cdots\pi(14)$       | 0.0067 | 0.0233 | 0.7387 |
|                                       | lone pair $\cdots\pi(15)$ | 0.0092 | 0.0308 | 0.8522 |
|                                       | lone pair $\cdots\pi(16)$ | 0.0093 | 0.0308 | 0.8528 |
|                                       | C-H $\cdots\pi(17)$       | 0.0140 | 0.0507 | 0.8433 |

Table S9. AIM analysis results of the intermolecular interactions in the BTA<sup>•</sup>-CBPQT<sup>n+</sup> complexes (a.u.)

|                                       | Types                     | $\rho$ | $\nabla^2\rho$ | $ V /G$ |
|---------------------------------------|---------------------------|--------|----------------|---------|
| BTA <sup>•</sup> -CBPQT <sup>4+</sup> | $\pi\cdots\pi(1)$         | 0.0047 | 0.0156         | 0.7007  |
|                                       | $\pi\cdots\pi(2)$         | 0.0042 | 0.0119         | 0.7417  |
|                                       | $\pi\cdots\pi(3)$         | 0.0071 | 0.0200         | 0.7959  |
|                                       | $\pi\cdots\pi(4)$         | 0.0046 | 0.0130         | 0.8010  |
|                                       | $\pi\cdots\pi(5)$         | 0.0085 | 0.0248         | 0.8614  |
|                                       | C-H $\cdots\pi(6)$        | 0.0058 | 0.0189         | 0.7034  |
|                                       | $\pi\cdots\pi(7)$         | 0.0070 | 0.0198         | 0.7995  |
|                                       | $\pi\cdots\pi(8)$         | 0.0047 | 0.0133         | 0.8004  |
|                                       | $\pi\cdots\pi(9)$         | 0.0086 | 0.0251         | 0.8595  |
|                                       | C-H $\cdots\pi(10)$       | 0.0062 | 0.0209         | 0.7128  |
|                                       | lone pair $\cdots\pi(11)$ | 0.0067 | 0.0206         | 0.7504  |
|                                       | lone pair $\cdots\pi(12)$ | 0.0033 | 0.0103         | 0.7066  |
|                                       | C-H $\cdots\pi(13)$       | 0.0116 | 0.0422         | 0.8134  |
|                                       | C-H $\cdots\pi(14)$       | 0.0084 | 0.0313         | 0.7339  |
| BTA <sup>•</sup> -CBPQT <sup>3+</sup> | $\pi\cdots\pi(1)$         | 0.0061 | 0.0178         | 0.7763  |
|                                       | $\pi\cdots\pi(2)$         | 0.0072 | 0.0203         | 0.8125  |
|                                       | $\pi\cdots\pi(3)$         | 0.0061 | 0.0182         | 0.8043  |
|                                       | $\pi\cdots\pi(4)$         | 0.0048 | 0.0164         | 0.7602  |
|                                       | $\pi\cdots\pi(5)$         | 0.0049 | 0.0152         | 0.8472  |
|                                       | $\pi\cdots\pi(6)$         | 0.0063 | 0.0174         | 0.8682  |
|                                       | C-H $\cdots\pi(7)$        | 0.0086 | 0.0281         | 0.7643  |
|                                       | $\pi\cdots\pi(8)$         | 0.0045 | 0.0152         | 0.6691  |
|                                       | $\pi\cdots\pi(9)$         | 0.0034 | 0.0096         | 0.7369  |
|                                       | $\pi\cdots\pi(10)$        | 0.0070 | 0.0197         | 0.7941  |
|                                       | $\pi\cdots\pi(11)$        | 0.0042 | 0.0120         | 0.7978  |
|                                       | $\pi\cdots\pi(12)$        | 0.0046 | 0.0148         | 0.8226  |
|                                       | $\pi\cdots\pi(13)$        | 0.0097 | 0.0289         | 0.8601  |
|                                       | C-H $\cdots\pi(14)$       | 0.0072 | 0.0236         | 0.7215  |
|                                       | C-H $\cdots\pi(15)$       | 0.0118 | 0.0423         | 0.8189  |

|                                              |                         |        |        |        |
|----------------------------------------------|-------------------------|--------|--------|--------|
|                                              | lone pair... $\pi$ (16) | 0.0062 | 0.0190 | 0.7483 |
|                                              | lone pair... $\pi$ (17) | 0.0035 | 0.0107 | 0.7098 |
|                                              | C-H... $\pi$ (18)       | 0.0082 | 0.0294 | 0.7455 |
| BTA <sup>•</sup> -CBPQT <sup>2(•+)</sup> (T) | $\pi$ ... $\pi$ (1)     | 0.0059 | 0.0167 | 0.7781 |
|                                              | $\pi$ ... $\pi$ (2)     | 0.0070 | 0.0189 | 0.8187 |
|                                              | $\pi$ ... $\pi$ (3)     | 0.0059 | 0.0173 | 0.8091 |
|                                              | $\pi$ ... $\pi$ (4)     | 0.0055 | 0.0168 | 0.8595 |
|                                              | $\pi$ ... $\pi$ (5)     | 0.0073 | 0.0203 | 0.8738 |
|                                              | C-H... $\pi$ (6)        | 0.0092 | 0.0294 | 0.7696 |
|                                              | $\pi$ ... $\pi$ (7)     | 0.0058 | 0.0166 | 0.7775 |
|                                              | $\pi$ ... $\pi$ (8)     | 0.0069 | 0.0189 | 0.8186 |
|                                              | $\pi$ ... $\pi$ (9)     | 0.0059 | 0.0174 | 0.8097 |
|                                              | $\pi$ ... $\pi$ (10)    | 0.0053 | 0.0162 | 0.8555 |
|                                              | $\pi$ ... $\pi$ (11)    | 0.0074 | 0.0204 | 0.8736 |
|                                              | C-H... $\pi$ (12)       | 0.0100 | 0.0322 | 0.7904 |
|                                              | lone pair... $\pi$ (13) | 0.0062 | 0.0189 | 0.7487 |
|                                              | C-H... $\pi$ (14)       | 0.0105 | 0.0391 | 0.7986 |
|                                              | C-H... $\pi$ (15)       | 0.0105 | 0.0391 | 0.8013 |
|                                              | lone pair... $\pi$ (16) | 0.0034 | 0.0105 | 0.7112 |
|                                              | C-H... $\pi$ (17)       | 0.0078 | 0.0284 | 0.7557 |
|                                              | C-H... $\pi$ (18)       | 0.0078 | 0.0281 | 0.7527 |
| BTA <sup>•</sup> -CBPQT <sup>2(•+)</sup> (S) | $\pi$ ... $\pi$ (1)     | 0.0066 | 0.0184 | 0.8196 |
|                                              | $\pi$ ... $\pi$ (2)     | 0.0063 | 0.0181 | 0.8132 |
|                                              | $\pi$ ... $\pi$ (3)     | 0.0058 | 0.0173 | 0.8695 |
|                                              | $\pi$ ... $\pi$ (4)     | 0.0067 | 0.0191 | 0.8653 |
|                                              | C-H... $\pi$ (5)        | 0.0096 | 0.0309 | 0.7790 |
|                                              | $\pi$ ... $\pi$ (6)     | 0.0060 | 0.0173 | 0.7788 |
|                                              | $\pi$ ... $\pi$ (7)     | 0.0070 | 0.0190 | 0.8191 |
|                                              | $\pi$ ... $\pi$ (8)     | 0.0061 | 0.0181 | 0.8099 |
|                                              | $\pi$ ... $\pi$ (9)     | 0.0054 | 0.0166 | 0.8603 |
|                                              | $\pi$ ... $\pi$ (10)    | 0.0075 | 0.0210 | 0.8703 |

|                                       |                         |        |        |        |
|---------------------------------------|-------------------------|--------|--------|--------|
|                                       | C-H... $\pi$ (11)       | 0.0098 | 0.0319 | 0.7892 |
|                                       | lone pair... $\pi$ (12) | 0.0034 | 0.0105 | 0.7128 |
|                                       | C-H... $\pi$ (13)       | 0.0110 | 0.0408 | 0.8070 |
|                                       | lone pair... $\pi$ (14) | 0.0065 | 0.0201 | 0.7517 |
|                                       | C-H... $\pi$ (15)       | 0.0070 | 0.0248 | 0.7541 |
|                                       | C-H... $\pi$ (16)       | 0.0078 | 0.0279 | 0.7519 |
|                                       | C-H... $\pi$ (17)       | 0.0079 | 0.0280 | 0.7402 |
| BTA <sup>•</sup> -CBPQT <sup>•+</sup> | $\pi$ ... $\pi$ (1)     | 0.0069 | 0.0195 | 0.7948 |
|                                       | $\pi$ ... $\pi$ (2)     | 0.0071 | 0.0201 | 0.8146 |
|                                       | $\pi$ ... $\pi$ (3)     | 0.0065 | 0.0195 | 0.8096 |
|                                       | $\pi$ ... $\pi$ (4)     | 0.0052 | 0.0168 | 0.7865 |
|                                       | $\pi$ ... $\pi$ (5)     | 0.0052 | 0.0164 | 0.8452 |
|                                       | $\pi$ ... $\pi$ (6)     | 0.0061 | 0.0165 | 0.8730 |
|                                       | C-H... $\pi$ (7)        | 0.0110 | 0.0339 | 0.8263 |
|                                       | $\pi$ ... $\pi$ (8)     | 0.0055 | 0.0155 | 0.7810 |
|                                       | $\pi$ ... $\pi$ (9)     | 0.0067 | 0.0178 | 0.8240 |
|                                       | $\pi$ ... $\pi$ (10)    | 0.0057 | 0.0165 | 0.8138 |
|                                       | $\pi$ ... $\pi$ (11)    | 0.0061 | 0.0181 | 0.8734 |
|                                       | $\pi$ ... $\pi$ (12)    | 0.0081 | 0.0227 | 0.8753 |
|                                       | C-H... $\pi$ (13)       | 0.0099 | 0.0314 | 0.7729 |
|                                       | C-H... $\pi$ (14)       | 0.0114 | 0.0416 | 0.8098 |
|                                       | lone pair... $\pi$ (15) | 0.0064 | 0.0194 | 0.7545 |
|                                       | lone pair... $\pi$ (16) | 0.0038 | 0.0115 | 0.7226 |
|                                       | C-H... $\pi$ (17)       | 0.0083 | 0.0292 | 0.7350 |
|                                       | C-H... $\pi$ (18)       | 0.0077 | 0.0277 | 0.7538 |
| BTA <sup>•</sup> -CBPQT <sup>0</sup>  | $\pi$ ... $\pi$ (1)     | 0.0078 | 0.0230 | 0.8050 |
|                                       | $\pi$ ... $\pi$ (2)     | 0.0072 | 0.0199 | 0.7952 |
|                                       | $\pi$ ... $\pi$ (3)     | 0.0073 | 0.0210 | 0.8215 |
|                                       | $\pi$ ... $\pi$ (4)     | 0.0058 | 0.0168 | 0.8916 |
|                                       | $\pi$ ... $\pi$ (5)     | 0.0048 | 0.0133 | 0.8591 |
|                                       | C-H... $\pi$ (6)        | 0.0088 | 0.0279 | 0.7793 |

|                           |        |        |        |
|---------------------------|--------|--------|--------|
| $\pi\ldots\pi(7)$         | 0.0065 | 0.0166 | 0.8398 |
| $\pi\ldots\pi(8)$         | 0.0051 | 0.0141 | 0.7956 |
| $\pi\ldots\pi(9)$         | 0.0053 | 0.0143 | 0.8287 |
| $\pi\ldots\pi(10)$        | 0.0036 | 0.0109 | 0.7335 |
| $\pi\ldots\pi(11)$        | 0.0056 | 0.0184 | 0.7781 |
| $\pi\ldots\pi(12)$        | 0.0047 | 0.0144 | 0.8353 |
| C-H $\ldots\pi(13)$       | 0.0109 | 0.0327 | 0.8088 |
| C-H $\ldots\pi(14)$       | 0.0116 | 0.0412 | 0.8189 |
| lone pair $\ldots\pi(15)$ | 0.0065 | 0.0197 | 0.7585 |
| lone pair $\ldots\pi(16)$ | 0.0043 | 0.0127 | 0.7333 |
| C-H $\ldots\pi(17)$       | 0.0076 | 0.0274 | 0.7391 |
| C-H $\ldots\pi(18)$       | 0.0074 | 0.0269 | 0.7624 |

---



Table S10. The  $D_0$ ,  $\Delta G^{\text{TOT}}$  and  $\Delta G^{\text{ZPE+GEO}}$  values of the  $\text{BIPY}^{\bullet+}\text{-CBPQT}^{\text{n}+}$  complexes (kcal/mol)

|                             | $\text{BIPY}^{\bullet+}\text{-CBPQT}^{4+}$ | $\text{BIPY}^{\bullet+}\text{-CBPQT}^{\bullet 3+}$ | $\text{BIPY}^{\bullet+}\text{-CBPQT}^{2(\bullet+)}(\text{T})$ | $\text{BIPY}^{\bullet+}\text{-CBPQT}^{2(\bullet+)}(\text{S})$ | $\text{BIPY}^{\bullet+}\text{-CBPQT}^{\bullet+}$ | $\text{BIPY}^{\bullet+}\text{-CBPQT}^0$ |
|-----------------------------|--------------------------------------------|----------------------------------------------------|---------------------------------------------------------------|---------------------------------------------------------------|--------------------------------------------------|-----------------------------------------|
| $\Delta G^{\text{int}}$     | -23.23                                     | -29.72                                             | -34.39                                                        | -33.59                                                        | -39.15                                           | -43.05                                  |
| $\Delta G^{\text{ZPE+GEO}}$ | 1.05                                       | 1.67                                               | 1.69                                                          | 3.30                                                          | 6.10                                             | 11.03                                   |
| $D_0$                       | 22.18                                      | 28.05                                              | 32.69                                                         | 30.29                                                         | 33.05                                            | 32.02                                   |

Table S11. The  $D_0$ ,  $\Delta G^{\text{TOT}}$  and  $\Delta G^{\text{ZPE+GEO}}$  values of the  $\text{NDI}^{\bullet-}\text{-CBPQT}^{\text{n}+}$  complexes (kcal/mol)

|                             | $\text{NDI}^{\bullet-}\text{-CBPQT}^{4+}$ | $\text{NDI}^{\bullet-}\text{-CBPQT}^{\bullet 3+}$ | $\text{NDI}^{\bullet-}\text{-CBPQT}^{2(\bullet+)}(\text{T})$ | $\text{NDI}^{\bullet-}\text{-CBPQT}^{2(\bullet+)}(\text{S})$ | $\text{NDI}^{\bullet-}\text{-CBPQT}^{\bullet+}$ | $\text{NDI}^{\bullet-}\text{-CBPQT}^0$ |
|-----------------------------|-------------------------------------------|---------------------------------------------------|--------------------------------------------------------------|--------------------------------------------------------------|-------------------------------------------------|----------------------------------------|
| $\Delta G^{\text{TOT}}$     | -57.06                                    | -50.17                                            | -42.90                                                       | -41.68                                                       | -32.45                                          | -27.92                                 |
| $\Delta G^{\text{ZPE+GEO}}$ | 30.45                                     | 33.18                                             | 13.70                                                        | 12.47                                                        | 17.60                                           | 16.42                                  |
| $D_0$                       | 26.61                                     | 16.99                                             | 29.20                                                        | 29.21                                                        | 14.85                                           | 11.50                                  |

Table S12. The  $D_0$ ,  $\Delta G^{\text{TOT}}$  and  $\Delta G^{\text{ZPE+GEO}}$  values of the BTA $\cdot$ -CBPQT $^{\text{n}+}$  complexes (kcal/mol)

|                             | BTA $\cdot$ -CBPQT $^{4+}$ | BTA $\cdot$ -CBPQT $^{3+}$ | BTA $\cdot$ -<br>CBPQT $^{2(++)}$ (T) | BTA $\cdot$ -<br>CBPQT $^{2(++)}$ (S) | BTA $\cdot$ -CBPQT $^{+}$ | BTA $\cdot$ -CBPQT $^0$ |
|-----------------------------|----------------------------|----------------------------|---------------------------------------|---------------------------------------|---------------------------|-------------------------|
| $\Delta E^{\text{TOT}}$     | -35.42                     | -35.57                     | -35.50                                | -35.19                                | -37.57                    | -38.87                  |
| $\Delta E^{\text{ZPE+geo}}$ | 11.05                      | 6.44                       | 3.48                                  | 3.31                                  | 5.88                      | 9.16                    |
| $D_0$                       | 24.37                      | 29.13                      | 32.02                                 | 31.88                                 | 31.69                     | 29.71                   |

## II. Atomic Cartesian coordinates of all optimized geometries (Å)

CBPQT<sup>4+</sup>

| Atom | X         | Y         | Z         |
|------|-----------|-----------|-----------|
| N    | 2.841668  | 3.493165  | 1.355508  |
| N    | -2.841669 | -3.493165 | -1.355506 |
| N    | -3.646592 | 2.905312  | -1.122633 |
| N    | 3.646593  | -2.905312 | 1.122631  |
| C    | 4.249002  | 3.317633  | 1.824716  |
| C    | -4.249003 | -3.317633 | -1.824713 |
| C    | 1.847940  | 2.978524  | 2.106789  |
| C    | -1.847942 | -2.978523 | -2.106788 |
| C    | 0.548225  | 2.983506  | 1.655677  |
| C    | -0.548226 | -2.983505 | -1.655676 |
| C    | 0.257168  | 3.519101  | 0.397599  |
| C    | -0.257168 | -3.519101 | -0.397599 |
| C    | 1.295969  | 4.089700  | -0.338534 |
| C    | -1.295968 | -4.089700 | 0.338535  |
| C    | 2.581534  | 4.062331  | 0.164390  |
| C    | -2.581534 | -4.062331 | -0.164388 |
| C    | -1.115425 | 3.402957  | -0.151305 |
| C    | 1.115425  | -3.402957 | 0.151305  |
| C    | -2.237226 | 3.568465  | 0.662549  |
| C    | 2.237226  | -3.568464 | -0.662550 |
| C    | -3.492611 | 3.311413  | 0.150931  |
| C    | 3.492611  | -3.311413 | -0.150933 |
| C    | -2.584776 | 2.796580  | -1.945544 |
| C    | 2.584777  | -2.796580 | 1.945542  |
| C    | -1.310338 | 3.046654  | -1.488757 |
| C    | 1.310339  | -3.046654 | 1.488757  |
| C    | -4.977617 | 2.430035  | -1.604902 |
| C    | 4.977618  | -2.430034 | 1.604900  |

|   |           |           |           |
|---|-----------|-----------|-----------|
| C | -4.951882 | 0.920820  | -1.679500 |
| C | 4.951882  | -0.920820 | 1.679499  |
| C | -4.927806 | 0.168466  | -0.501018 |
| C | 4.927806  | -0.168465 | 0.501018  |
| C | -4.752250 | -1.205329 | -0.553362 |
| C | 4.752250  | 1.205331  | 0.553363  |
| C | -4.598914 | -1.848701 | -1.785101 |
| C | 4.598913  | 1.848701  | 1.785103  |
| C | -4.679648 | -1.107579 | -2.961291 |
| C | 4.679648  | 1.107578  | 2.961292  |
| C | -4.855013 | 0.274011  | -2.908544 |
| C | 4.855013  | -0.274012 | 2.908544  |
| H | 4.310193  | 3.729535  | 2.832893  |
| H | -4.310194 | -3.729536 | -2.832890 |
| H | 4.882413  | 3.915791  | 1.169647  |
| H | -4.882414 | -3.915791 | -1.169643 |
| H | 2.130787  | 2.537911  | 3.053612  |
| H | -2.130789 | -2.537910 | -3.053610 |
| H | -0.215539 | 2.525709  | 2.271860  |
| H | 0.215537  | -2.525708 | -2.271860 |
| H | 1.126428  | 4.552942  | -1.302600 |
| H | -1.126427 | -4.552943 | 1.302600  |
| H | 3.422932  | 4.475334  | -0.375913 |
| H | -3.422931 | -4.475335 | 0.375915  |
| H | -2.153442 | 3.886423  | 1.694499  |
| H | 2.153441  | -3.886422 | -1.694500 |
| H | -4.390240 | 3.403404  | 0.747551  |
| H | 4.390239  | -3.403403 | -0.747553 |
| H | -2.783848 | 2.473926  | -2.959080 |
| H | 2.783850  | -2.473927 | 2.959079  |
| H | -0.480433 | 2.911197  | -2.171348 |
| H | 0.480434  | -2.911198 | 2.171348  |

|   |           |           |           |
|---|-----------|-----------|-----------|
| H | -5.158497 | 2.890096  | -2.576718 |
| H | 5.158498  | -2.890096 | 2.576715  |
| H | -5.724955 | 2.801941  | -0.903609 |
| H | 5.724956  | -2.801940 | 0.903606  |
| H | -5.028024 | 0.656565  | 0.464362  |
| H | 5.028024  | -0.656563 | -0.464363 |
| H | -4.715145 | -1.774171 | 0.371264  |
| H | 4.715145  | 1.774173  | -0.371262 |
| H | -4.586741 | -1.598440 | -3.925521 |
| H | 4.586742  | 1.598438  | 3.925522  |
| H | -4.897667 | 0.842023  | -3.833077 |
| H | 4.897668  | -0.842025 | 3.833076  |

CBPQT<sup>•3+</sup>

| Atom | X         | Y         | Z         |
|------|-----------|-----------|-----------|
| N    | 2.955799  | 3.565228  | 1.193946  |
| N    | -2.795842 | -3.491624 | -1.500667 |
| N    | -3.734296 | 2.904831  | -0.973612 |
| N    | 3.578613  | -2.911372 | 1.259895  |
| C    | 4.344056  | 3.341094  | 1.633954  |
| C    | -4.191996 | -3.310715 | -2.002385 |
| C    | 1.934629  | 3.519382  | 2.099351  |
| C    | -1.791120 | -2.900835 | -2.177416 |
| C    | 0.630784  | 3.500553  | 1.710428  |
| C    | -0.508945 | -2.902762 | -1.678957 |
| C    | 0.265965  | 3.497788  | 0.327031  |
| C    | -0.247860 | -3.515245 | -0.449685 |
| C    | 1.367456  | 3.593205  | -0.580569 |
| C    | -1.294913 | -4.164354 | 0.205379  |
| C    | 2.653332  | 3.615017  | -0.136411 |
| C    | -2.561830 | -4.135216 | -0.342737 |

|   |           |           |           |
|---|-----------|-----------|-----------|
| C | -1.082354 | 3.367432  | -0.112480 |
| C | 1.099438  | -3.396620 | 0.157953  |
| C | -2.188599 | 3.309449  | 0.792310  |
| C | 2.254951  | -3.476620 | -0.621718 |
| C | -3.455169 | 3.076393  | 0.351278  |
| C | 3.482593  | -3.227451 | -0.044885 |
| C | -2.716347 | 3.003984  | -1.879136 |
| C | 2.484639  | -2.880077 | 2.044851  |
| C | -1.433710 | 3.240826  | -1.493911 |
| C | 1.234385  | -3.125140 | 1.521841  |
| C | -5.047806 | 2.399417  | -1.409932 |
| C | 4.881368  | -2.438318 | 1.816881  |
| C | -4.986249 | 0.897757  | -1.587161 |
| C | 4.888707  | -0.928083 | 1.813719  |
| C | -4.981067 | 0.062755  | -0.465616 |
| C | 5.129151  | -0.236916 | 0.624226  |
| C | -4.774279 | -1.300843 | -0.606711 |
| C | 4.999794  | 1.144617  | 0.579277  |
| C | -4.570666 | -1.854790 | -1.873971 |
| C | 4.628804  | 1.857480  | 1.721721  |
| C | -4.625667 | -1.033085 | -2.997595 |
| C | 4.437355  | 1.170604  | 2.919698  |
| C | -4.833325 | 0.337159  | -2.852881 |
| C | 4.565016  | -0.214601 | 2.966923  |
| H | 4.471761  | 3.830900  | 2.601184  |
| H | -4.214094 | -3.655320 | -3.037130 |
| H | 5.003293  | 3.835243  | 0.917693  |
| H | -4.831195 | -3.963887 | -1.408193 |
| H | 2.223791  | 3.493069  | 3.142492  |
| H | -2.052424 | -2.402321 | -3.101529 |
| H | -0.114052 | 3.463234  | 2.494323  |
| H | 0.262815  | -2.382370 | -2.232329 |

|   |           |           |           |
|---|-----------|-----------|-----------|
| H | 1.218021  | 3.651374  | -1.650357 |
| H | -1.148367 | -4.688382 | 1.141887  |
| H | 3.494893  | 3.672781  | -0.815144 |
| H | -3.410188 | -4.604227 | 0.138036  |
| H | -2.057773 | 3.446828  | 1.857304  |
| H | 2.218168  | -3.722831 | -1.675816 |
| H | -4.298065 | 3.017858  | 1.028454  |
| H | 4.404204  | -3.254806 | -0.611017 |
| H | -2.990361 | 2.871413  | -2.918424 |
| H | 2.637278  | -2.626874 | 3.085517  |
| H | -0.690116 | 3.301724  | -2.277417 |
| H | 0.375608  | -3.052559 | 2.177532  |
| H | -5.309667 | 2.901264  | -2.343613 |
| H | 4.978175  | -2.855188 | 2.819723  |
| H | -5.780623 | 2.688934  | -0.654592 |
| H | 5.668393  | -2.861144 | 1.192557  |
| H | -5.123066 | 0.482236  | 0.526267  |
| H | 5.408775  | -0.776244 | -0.276667 |
| H | -4.753808 | -1.933171 | 0.276610  |
| H | 5.180767  | 1.667195  | -0.355643 |
| H | -4.491258 | -1.454230 | -3.989968 |
| H | 4.176693  | 1.713046  | 3.824078  |
| H | -4.856158 | 0.970180  | -3.735310 |
| H | 4.403787  | -0.734024 | 3.907265  |

CBPQT<sup>2(•+)</sup>(Triplet)

| Atom | X         | Y         | Z         |
|------|-----------|-----------|-----------|
| N    | 2.929272  | 3.582334  | 1.328557  |
| N    | -2.929272 | -3.582334 | -1.328557 |
| N    | -3.694354 | 2.907328  | -1.034077 |
| N    | 3.694354  | -2.907328 | 1.034077  |



|   |           |           |           |
|---|-----------|-----------|-----------|
| C | 4.310236  | 3.356880  | 1.792209  |
| C | -4.310236 | -3.356880 | -1.792209 |
| C | 1.887570  | 3.504623  | 2.207257  |
| C | -1.887570 | -3.504623 | -2.207257 |
| C | 0.594158  | 3.474915  | 1.785833  |
| C | -0.594158 | -3.474914 | -1.785833 |
| C | 0.262701  | 3.501798  | 0.394341  |
| C | -0.262701 | -3.501797 | -0.394341 |
| C | 1.384266  | 3.634876  | -0.483691 |
| C | -1.384266 | -3.634876 | 0.483691  |
| C | 2.658476  | 3.657490  | -0.007345 |
| C | -2.658476 | -3.657490 | 0.007345  |
| C | -1.072253 | 3.364489  | -0.081523 |
| C | 1.072253  | -3.364488 | 0.081523  |
| C | -2.182379 | 3.139405  | 0.792117  |
| C | 2.182379  | -3.139405 | -0.792117 |
| C | -3.431634 | 2.908710  | 0.305521  |
| C | 3.431634  | -2.908710 | -0.305521 |
| C | -2.674281 | 3.164456  | -1.904135 |
| C | 2.674281  | -3.164456 | 1.904135  |
| C | -1.405040 | 3.398004  | -1.472520 |
| C | 1.405040  | -3.398004 | 1.472520  |
| C | -4.990328 | 2.410474  | -1.531672 |
| C | 4.990328  | -2.410474 | 1.531672  |
| C | -4.955186 | 0.903326  | -1.654952 |
| C | 4.955186  | -0.903326 | 1.654952  |
| C | -5.334799 | 0.097985  | -0.580829 |
| C | 5.334799  | -0.097984 | 0.580829  |
| C | -5.171788 | -1.281919 | -0.643397 |
| C | 5.171788  | 1.281919  | 0.643397  |
| C | -4.627043 | -1.877907 | -1.780865 |
| C | 4.627043  | 1.877907  | 1.780865  |

|   |           |           |           |
|---|-----------|-----------|-----------|
| C | -4.290088 | -1.076295 | -2.873112 |
| C | 4.290088  | 1.076295  | 2.873113  |
| C | -4.452726 | 0.302577  | -2.810535 |
| C | 4.452726  | -0.302577 | 2.810535  |
| H | 4.396872  | 3.781157  | 2.794377  |
| H | -4.396872 | -3.781157 | -2.794377 |
| H | 4.977130  | 3.916017  | 1.132912  |
| H | -4.977130 | -3.916017 | -1.132912 |
| H | 2.150964  | 3.466272  | 3.256851  |
| H | -2.150964 | -3.466272 | -3.256851 |
| H | -0.168912 | 3.424174  | 2.551060  |
| H | 0.168913  | -3.424174 | -2.551060 |
| H | 1.259958  | 3.703087  | -1.556126 |
| H | -1.259958 | -3.703087 | 1.556126  |
| H | 3.516418  | 3.730192  | -0.663809 |
| H | -3.516418 | -3.730192 | 0.663809  |
| H | -2.064452 | 3.123014  | 1.867323  |
| H | 2.064452  | -3.123014 | -1.867323 |
| H | -4.273863 | 2.709447  | 0.955989  |
| H | 4.273863  | -2.709446 | -0.955988 |
| H | -2.933654 | 3.170397  | -2.955445 |
| H | 2.933654  | -3.170397 | 2.955445  |
| H | -0.660286 | 3.603071  | -2.230031 |
| H | 0.660286  | -3.603071 | 2.230031  |
| H | -5.181268 | 2.889993  | -2.493528 |
| H | 5.181268  | -2.889993 | 2.493528  |
| H | -5.762472 | 2.739159  | -0.833003 |
| H | 5.762472  | -2.739159 | 0.833004  |
| H | -5.754421 | 0.547368  | 0.314925  |
| H | 5.754421  | -0.547367 | -0.314925 |
| H | -5.464887 | -1.894823 | 0.204637  |
| H | 5.464888  | 1.894823  | -0.204637 |

|   |           |           |           |
|---|-----------|-----------|-----------|
| H | -3.889843 | -1.527193 | -3.777023 |
| H | 3.889843  | 1.527193  | 3.777023  |
| H | -4.178296 | 0.912576  | -3.667036 |
| H | 4.178296  | -0.912576 | 3.667036  |

CBPQT<sup>2(•+)</sup>(Singlet)

| Atom | X         | Y         | Z         |
|------|-----------|-----------|-----------|
| N    | 2.929290  | 3.582233  | 1.328559  |
| N    | -2.929290 | -3.582233 | -1.328558 |
| N    | -3.694346 | 2.907225  | -1.034086 |
| N    | 3.694346  | -2.907225 | 1.034085  |
| C    | 4.310273  | 3.356864  | 1.792228  |
| C    | -4.310273 | -3.356864 | -1.792227 |
| C    | 1.887586  | 3.504498  | 2.207253  |
| C    | -1.887586 | -3.504498 | -2.207253 |
| C    | 0.594176  | 3.474746  | 1.785824  |
| C    | -0.594176 | -3.474746 | -1.785824 |
| C    | 0.262724  | 3.501618  | 0.394333  |
| C    | -0.262724 | -3.501618 | -0.394333 |
| C    | 1.384288  | 3.634728  | -0.483694 |
| C    | -1.384288 | -3.634728 | 0.483694  |
| C    | 2.658495  | 3.657385  | -0.007342 |
| C    | -2.658495 | -3.657385 | 0.007343  |
| C    | -1.072231 | 3.364309  | -0.081534 |
| C    | 1.072231  | -3.364309 | 0.081534  |
| C    | -2.182362 | 3.139259  | 0.792105  |
| C    | 2.182362  | -3.139259 | -0.792106 |
| C    | -3.431625 | 2.908607  | 0.305511  |
| C    | 3.431625  | -2.908607 | -0.305511 |
| C    | -2.674267 | 3.164327  | -1.904143 |
| C    | 2.674267  | -3.164327 | 1.904143  |

|   |           |           |           |
|---|-----------|-----------|-----------|
| C | -1.405017 | 3.397833  | -1.472528 |
| C | 1.405017  | -3.397833 | 1.472528  |
| C | -4.990359 | 2.410450  | -1.531688 |
| C | 4.990360  | -2.410450 | 1.531687  |
| C | -4.955240 | 0.903317  | -1.654975 |
| C | 4.955240  | -0.903317 | 1.654975  |
| C | -5.334815 | 0.097977  | -0.580830 |
| C | 5.334815  | -0.097977 | 0.580830  |
| C | -5.171805 | -1.281919 | -0.643399 |
| C | 5.171805  | 1.281920  | 0.643399  |
| C | -4.627099 | -1.877911 | -1.780891 |
| C | 4.627098  | 1.877911  | 1.780891  |
| C | -4.290148 | -1.076298 | -2.873144 |
| C | 4.290148  | 1.076298  | 2.873144  |
| C | -4.452785 | 0.302569  | -2.810565 |
| C | 4.452785  | -0.302569 | 2.810565  |
| H | 4.396874  | 3.781165  | 2.794390  |
| H | -4.396874 | -3.781165 | -2.794389 |
| H | 4.977136  | 3.916027  | 1.132921  |
| H | -4.977137 | -3.916027 | -1.132920 |
| H | 2.150976  | 3.466160  | 3.256848  |
| H | -2.150976 | -3.466160 | -3.256848 |
| H | -0.168895 | 3.423994  | 2.551050  |
| H | 0.168895  | -3.423994 | -2.551050 |
| H | 1.259982  | 3.702949  | -1.556129 |
| H | -1.259981 | -3.702949 | 1.556129  |
| H | 3.516437  | 3.730120  | -0.663803 |
| H | -3.516437 | -3.730120 | 0.663804  |
| H | -2.064439 | 3.122882  | 1.867312  |
| H | 2.064439  | -3.122882 | -1.867313 |
| H | -4.273861 | 2.709379  | 0.955980  |
| H | 4.273861  | -2.709378 | -0.955980 |

|   |           |           |           |
|---|-----------|-----------|-----------|
| H | -2.933641 | 3.170279  | -2.955452 |
| H | 2.933641  | -3.170279 | 2.955452  |
| H | -0.660259 | 3.602886  | -2.230040 |
| H | 0.660260  | -3.602886 | 2.230040  |
| H | -5.181274 | 2.889999  | -2.493535 |
| H | 5.181274  | -2.889999 | 2.493534  |
| H | -5.762478 | 2.739165  | -0.833004 |
| H | 5.762478  | -2.739165 | 0.833003  |
| H | -5.754433 | 0.547369  | 0.314922  |
| H | 5.754433  | -0.547368 | -0.314922 |
| H | -5.464896 | -1.894833 | 0.204632  |
| H | 5.464896  | 1.894834  | -0.204631 |
| H | -3.889937 | -1.527207 | -3.777065 |
| H | 3.889937  | 1.527206  | 3.777065  |
| H | -4.178389 | 0.912574  | -3.667073 |
| H | 4.178389  | -0.912574 | 3.667073  |

CBPQT<sup>•+</sup>

| Atom | X         | Y         | Z         |
|------|-----------|-----------|-----------|
| N    | 2.949262  | 3.697697  | 1.370740  |
| N    | -2.926506 | -3.577496 | -1.328823 |
| N    | -3.747511 | 3.012734  | -1.041124 |
| N    | 3.692813  | -2.906451 | 1.031159  |
| N    | 4.308015  | 3.392519  | 1.809903  |
| N    | -4.302744 | -3.331717 | -1.797034 |
| N    | 1.885764  | 3.465678  | 2.233279  |
| N    | -1.882152 | -3.537978 | -2.206229 |
| N    | 0.614217  | 3.335335  | 1.810782  |
| N    | -0.589117 | -3.522109 | -1.782320 |
| N    | 0.247482  | 3.388801  | 0.393600  |
| N    | -0.261875 | -3.519168 | -0.389700 |

|   |           |           |           |
|---|-----------|-----------|-----------|
| N | 1.409109  | 3.603982  | -0.472381 |
| N | -1.387444 | -3.614153 | 0.488291  |
| N | 2.658911  | 3.725599  | 0.013050  |
| N | -2.660320 | -3.627659 | 0.008930  |
| N | -1.036709 | 3.254446  | -0.069448 |
| N | 1.072715  | -3.384155 | 0.086764  |
| N | -2.197633 | 3.034932  | 0.796348  |
| N | 2.194440  | -3.241467 | -0.789423 |
| N | -3.446811 | 2.908564  | 0.310877  |
| N | 3.443573  | -2.999243 | -0.307228 |
| N | -2.675908 | 3.180227  | -1.908566 |
| N | 2.661812  | -3.090432 | 1.906654  |
| N | -1.404500 | 3.313283  | -1.486092 |
| N | 1.393262  | -3.334117 | 1.480143  |
| N | -4.997331 | 2.445960  | -1.541049 |
| N | 4.985168  | -2.385732 | 1.513869  |
| N | -4.934868 | 0.936482  | -1.656851 |
| N | 4.930504  | -0.879489 | 1.631753  |
| N | -5.329069 | 0.125582  | -0.591604 |
| N | 5.233336  | -0.074403 | 0.532368  |
| N | -5.165043 | -1.254669 | -0.652288 |
| N | 5.070546  | 1.304573  | 0.603921  |
| N | -4.603055 | -1.850037 | -1.781677 |
| N | 4.601858  | 1.906521  | 1.773367  |
| N | -4.238443 | -1.044517 | -2.862424 |
| N | 4.330033  | 1.101652  | 2.881197  |
| N | -4.403281 | 0.334196  | -2.799482 |
| N | 4.492674  | -0.277935 | 2.812273  |
| N | 4.430346  | 3.784316  | 2.824132  |
| N | -4.389581 | -3.752372 | -2.800771 |
| N | 5.000114  | 3.938803  | 1.162233  |
| N | -4.978760 | -3.885538 | -1.142216 |

|   |           |           |           |
|---|-----------|-----------|-----------|
| N | 2.146930  | 3.423072  | 3.285424  |
| N | -2.142880 | -3.515827 | -3.257039 |
| N | -0.144683 | 3.200061  | 2.572718  |
| N | 0.176513  | -3.496364 | -2.546218 |
| N | 1.288911  | 3.685183  | -1.546386 |
| N | -1.266895 | -3.663914 | 1.562151  |
| N | 3.513025  | 3.883481  | -0.637016 |
| N | -3.521234 | -3.672263 | 0.664058  |
| N | -2.079781 | 2.973988  | 1.871960  |
| N | 2.086844  | -3.306479 | -1.863877 |
| N | -4.299598 | 2.741798  | 0.960429  |
| N | 4.296436  | -2.865611 | -0.960671 |
| N | -2.937128 | 3.227232  | -2.960552 |
| N | 2.912193  | -3.024065 | 2.958005  |
| N | -0.649901 | 3.480795  | -2.245881 |
| N | 0.638117  | -3.471563 | 2.242616  |
| N | -5.204893 | 2.900713  | -2.514020 |
| N | 5.193713  | -2.858127 | 2.475883  |
| N | -5.799729 | 2.745790  | -0.860268 |
| N | 5.753595  | -2.706585 | 0.807796  |
| N | -5.765944 | 0.574495  | 0.296532  |
| N | 5.597936  | -0.524943 | -0.387085 |
| N | -5.475079 | -1.869741 | 0.188576  |
| N | 5.309213  | 1.917189  | -0.261582 |
| N | -3.819523 | -1.494295 | -3.758800 |
| N | 3.984725  | 1.554513  | 3.806914  |
| N | -4.111748 | 0.947646  | -3.648083 |
| N | 4.273573  | -0.887227 | 3.685513  |

---

CBPQT<sup>0</sup>

---

Atom

X

Y

Z

---

---

|   |           |           |           |
|---|-----------|-----------|-----------|
| N | 2.950891  | 3.695660  | 1.353646  |
| N | -2.950891 | -3.695659 | -1.353646 |
| N | -3.750404 | 3.019677  | -1.045441 |
| N | 3.750404  | -3.019677 | 1.045441  |
| C | 4.302785  | 3.365967  | 1.797592  |
| C | -4.302785 | -3.365967 | -1.797592 |
| C | 1.883453  | 3.507536  | 2.221450  |
| C | -1.883452 | -3.507536 | -2.221450 |
| C | 0.609508  | 3.390465  | 1.802298  |
| C | -0.609508 | -3.390465 | -1.802298 |
| C | 0.244436  | 3.411098  | 0.383892  |
| C | -0.244436 | -3.411098 | -0.383892 |
| C | 1.409449  | 3.582462  | -0.487193 |
| C | -1.409449 | -3.582461 | 0.487193  |
| C | 2.661137  | 3.692748  | -0.004298 |
| C | -2.661137 | -3.692747 | 0.004298  |
| C | -1.040896 | 3.281142  | -0.076483 |
| C | 1.040896  | -3.281142 | 0.076483  |
| C | -2.204817 | 3.099405  | 0.793936  |
| C | 2.204817  | -3.099405 | -0.793936 |
| C | -3.453140 | 2.960569  | 0.309715  |
| C | 3.453140  | -2.960569 | -0.309715 |
| C | -2.677060 | 3.161536  | -1.915127 |
| C | 2.677060  | -3.161536 | 1.915127  |
| C | -1.406185 | 3.304187  | -1.494758 |
| C | 1.406185  | -3.304187 | 1.494758  |
| C | -4.992501 | 2.424499  | -1.532501 |
| C | 4.992501  | -2.424499 | 1.532501  |
| C | -4.908450 | 0.915704  | -1.637009 |
| C | 4.908450  | -0.915704 | 1.637009  |
| C | -5.253673 | 0.107410  | -0.552388 |
| C | 5.253673  | -0.107410 | 0.552389  |



|   |           |           |           |
|---|-----------|-----------|-----------|
| C | -5.089014 | -1.272659 | -0.615652 |
| C | 5.089014  | 1.272659  | 0.615653  |
| C | -4.575792 | -1.876372 | -1.764817 |
| C | 4.575792  | 1.876372  | 1.764817  |
| C | -4.249427 | -1.069714 | -2.857092 |
| C | 4.249427  | 1.069714  | 2.857092  |
| C | -4.413869 | 0.309858  | -2.793802 |
| C | 4.413869  | -0.309858 | 2.793802  |
| H | 4.426819  | 3.758728  | 2.811336  |
| H | -4.426819 | -3.758728 | -2.811336 |
| H | 5.006377  | 3.900059  | 1.151742  |
| H | -5.006377 | -3.900059 | -1.151742 |
| H | 2.143981  | 3.488859  | 3.274542  |
| H | -2.143981 | -3.488859 | -3.274542 |
| H | -0.152044 | 3.290478  | 2.566996  |
| H | 0.152044  | -3.290478 | -2.566996 |
| H | 1.290759  | 3.635309  | -1.563170 |
| H | -1.290759 | -3.635309 | 1.563170  |
| H | 3.518723  | 3.813692  | -0.657792 |
| H | -3.518723 | -3.813692 | 0.657792  |
| H | -2.089797 | 3.077712  | 1.871425  |
| H | 2.089797  | -3.077712 | -1.871425 |
| H | -4.308354 | 2.820466  | 0.962440  |
| H | 4.308354  | -2.820466 | -0.962440 |
| H | -2.936940 | 3.177828  | -2.968421 |
| H | 2.936940  | -3.177828 | 2.968421  |
| H | -0.649890 | 3.449894  | -2.257383 |
| H | 0.649890  | -3.449894 | 2.257383  |
| H | -5.213965 | 2.867201  | -2.508250 |
| H | 5.213965  | -2.867201 | 2.508250  |
| H | -5.794956 | 2.718209  | -0.849020 |
| H | 5.794956  | -2.718209 | 0.849021  |

|   |           |           |           |
|---|-----------|-----------|-----------|
| H | -5.658709 | 0.558937  | 0.349858  |
| H | 5.658709  | -0.558937 | -0.349858 |
| H | -5.365837 | -1.885864 | 0.238507  |
| H | 5.365837  | 1.885864  | -0.238507 |
| H | -3.864592 | -1.523214 | -3.767138 |
| H | 3.864592  | 1.523214  | 3.767139  |
| H | -4.156586 | 0.920720  | -3.655744 |
| H | 4.156586  | -0.920720 | 3.655744  |

BIPY<sup>2+</sup>

| Atom | X         | Y         | Z         |
|------|-----------|-----------|-----------|
| N    | 2.439425  | 1.062753  | 2.271946  |
| C    | 2.317489  | 1.681600  | 1.080941  |
| H    | 3.006054  | 2.492898  | 0.884539  |
| C    | 1.362628  | 1.281704  | 0.172103  |
| H    | 1.307433  | 1.790128  | -0.782582 |
| C    | 0.512424  | 0.219395  | 0.489027  |
| C    | 0.660181  | -0.404566 | 1.728317  |
| H    | 0.018675  | -1.221085 | 2.036593  |
| C    | 1.630574  | 0.039077  | 2.602695  |
| H    | 1.779844  | -0.408162 | 3.576147  |
| C    | 3.454814  | 1.546737  | 3.228660  |
| H    | 4.383502  | 1.733575  | 2.691545  |
| H    | 3.617835  | 0.785569  | 3.988401  |
| N    | -2.443023 | -1.070353 | -2.264035 |
| C    | -1.726334 | -1.984079 | -1.581196 |
| H    | -1.945477 | -3.024231 | -1.782502 |
| C    | -0.761535 | -1.592915 | -0.678074 |
| H    | -0.196284 | -2.356750 | -0.158692 |
| C    | -0.520923 | -0.232992 | -0.472799 |
| C    | -1.274866 | 0.692926  | -1.195898 |

|   |           |           |           |
|---|-----------|-----------|-----------|
| H | -1.145779 | 1.759951  | -1.063731 |
| C | -2.230501 | 0.247036  | -2.084128 |
| H | -2.843806 | 0.922871  | -2.664642 |
| C | -3.442104 | -1.523723 | -3.252342 |
| H | -3.907030 | -2.438175 | -2.888892 |
| H | -4.198391 | -0.750251 | -3.370284 |
| H | 3.089779  | 2.465010  | 3.689261  |
| H | -2.936521 | -1.705574 | -4.201228 |

NDI

| Atom | X         | Y         | Z         |
|------|-----------|-----------|-----------|
| C    | -1.499826 | 1.131781  | 0.069785  |
| C    | -0.802298 | -0.092226 | 0.062997  |
| C    | -0.809137 | 2.323194  | 0.049514  |
| C    | -2.984278 | 1.132285  | 0.099147  |
| C    | 0.607668  | -0.091783 | 0.035097  |
| C    | -1.493198 | -1.327928 | 0.083556  |
| C    | 1.297246  | 1.140536  | 0.014988  |
| C    | 1.306531  | -1.319150 | 0.027821  |
| C    | 0.598862  | 2.327627  | 0.022029  |
| C    | 2.781700  | 1.150251  | -0.014007 |
| C    | -2.979352 | -1.345956 | 0.113798  |
| C    | -0.793419 | -2.514383 | 0.076213  |
| C    | 2.792762  | -1.327991 | -0.002050 |
| C    | 0.614449  | -2.509945 | 0.048000  |
| C    | 4.890506  | -0.045939 | -0.049085 |
| C    | -5.085236 | -0.077129 | 0.149579  |
| H    | -1.336241 | -3.452540 | 0.092399  |
| H    | 1.163373  | -3.444676 | 0.042101  |
| H    | 5.228357  | 0.479009  | -0.944256 |
| H    | -1.358774 | 3.257600  | 0.054935  |

|   |           |           |           |
|---|-----------|-----------|-----------|
| H | 1.142406  | 3.265460  | 0.006197  |
| H | -5.441449 | -1.103470 | 0.175143  |
| H | -5.462492 | 0.428848  | -0.740905 |
| H | -5.425311 | 0.460675  | 1.036201  |
| H | 5.253906  | -1.070036 | -0.056846 |
| H | 5.263044  | 0.477490  | 0.833211  |
| N | 3.428812  | -0.084751 | -0.020853 |
| N | -3.623350 | -0.106680 | 0.120409  |
| O | 3.429947  | -2.366135 | -0.009603 |
| O | -3.609986 | -2.387960 | 0.132008  |
| O | 3.428806  | 2.182474  | -0.031116 |
| O | -3.638027 | 2.160450  | 0.104590  |

TTF

| Atom | X         | Y        | Z         |
|------|-----------|----------|-----------|
| C    | -1.652175 | 4.754528 | -0.071950 |
| C    | 0.373421  | 6.350302 | -0.420228 |
| C    | -0.693041 | 7.148786 | -0.418015 |
| H    | 1.397207  | 6.689637 | -0.517399 |
| H    | -0.656063 | 8.226820 | -0.513397 |
| C    | -2.439003 | 3.703119 | 0.216269  |
| C    | -3.348392 | 1.378556 | 0.951389  |
| C    | -4.414175 | 2.177938 | 0.953194  |
| H    | -3.360218 | 0.334333 | 1.237877  |
| H    | -5.412811 | 1.874008 | 1.241461  |
| S    | -2.279059 | 6.404539 | -0.276098 |
| S    | 0.106743  | 4.618587 | -0.281715 |
| S    | -4.197780 | 3.840644 | 0.425939  |
| S    | -1.813614 | 2.052713 | 0.422083  |

BIPY<sup>•+</sup>

| Atom | X         | Y         | Z         |
|------|-----------|-----------|-----------|
| N    | 2.485336  | 1.074816  | 2.281458  |
| C    | 2.056748  | 1.899178  | 1.281981  |
| H    | 2.521725  | 2.876173  | 1.240430  |
| C    | 1.104970  | 1.511047  | 0.389700  |
| H    | 0.830852  | 2.225873  | -0.374787 |
| C    | 0.498868  | 0.217131  | 0.459575  |
| C    | 0.976968  | -0.606981 | 1.526684  |
| H    | 0.598795  | -1.608492 | 1.683088  |
| C    | 1.932164  | -0.167580 | 2.391152  |
| H    | 2.300327  | -0.781761 | 3.203329  |
| C    | 3.459083  | 1.545698  | 3.265977  |
| H    | 4.146152  | 2.244015  | 2.787738  |
| H    | 4.026006  | 0.695634  | 3.645593  |
| N    | -2.484763 | -1.074219 | -2.281511 |
| C    | -2.055918 | -1.898715 | -1.282253 |
| H    | -2.520693 | -2.875813 | -1.240881 |
| C    | -1.104125 | -1.510592 | -0.389986 |
| H    | -0.829740 | -2.225554 | 0.374279  |
| C    | -0.498261 | -0.216554 | -0.459658 |
| C    | -0.976608 | 0.607688  | -1.526556 |
| H    | -0.598690 | 1.609327  | -1.682750 |
| C    | -1.931824 | 0.168297  | -2.391007 |
| H    | -2.300205 | 0.782593  | -3.202997 |
| C    | -3.458538 | -1.545075 | -3.266015 |
| H    | -4.145506 | -2.243514 | -2.787809 |
| H    | -4.025569 | -0.695017 | -3.645484 |
| H    | 2.948393  | 2.043370  | 4.094261  |
| H    | -2.947862 | -2.042596 | -4.094398 |

NDI\*-

| Atom | X         | Y         | Z         |
|------|-----------|-----------|-----------|
| C    | -1.505820 | 1.133534  | 0.069909  |
| C    | -0.812120 | -0.095910 | 0.063284  |
| C    | -0.794568 | 2.348589  | 0.049223  |
| C    | -2.961414 | 1.138781  | 0.098023  |
| C    | 0.617544  | -0.091340 | 0.034770  |
| C    | -1.499851 | -1.329316 | 0.084121  |
| C    | 1.303183  | 1.142474  | 0.014894  |
| C    | 1.313324  | -1.320388 | 0.027179  |
| C    | 0.583950  | 2.353002  | 0.022461  |
| C    | 2.758754  | 1.156942  | -0.013158 |
| C    | -2.955565 | -1.352137 | 0.114050  |
| C    | -0.778282 | -2.539343 | 0.076071  |
| C    | 2.769119  | -1.333990 | -0.002139 |
| C    | 0.599713  | -2.534945 | 0.047909  |
| C    | 4.861374  | -0.047139 | -0.048330 |
| C    | -5.056137 | -0.077950 | 0.148856  |
| H    | -1.330314 | -3.472776 | 0.092358  |
| H    | 1.157860  | -3.464860 | 0.041503  |
| H    | 5.205887  | 0.478812  | -0.941503 |
| H    | -1.353681 | 3.278033  | 0.054904  |
| H    | 1.136944  | 3.285981  | 0.006772  |
| H    | -5.408852 | -1.105777 | 0.175812  |
| H    | -5.440063 | 0.428031  | -0.739939 |
| H    | -5.402208 | 0.462965  | 1.032381  |
| H    | 5.220161  | -1.073241 | -0.055428 |
| H    | 5.240585  | 0.477863  | 0.831338  |
| N    | 3.403820  | -0.083743 | -0.020175 |
| N    | -3.598390 | -0.105898 | 0.119499  |
| O    | 3.435045  | -2.372116 | -0.011116 |
| O    | -3.614618 | -2.394472 | 0.134030  |

|   |           |          |           |
|---|-----------|----------|-----------|
| O | 3.433871  | 2.188892 | -0.030579 |
| O | -3.643252 | 2.166442 | 0.104019  |

BTA\*

| Atom | X         | Y         | Z         |
|------|-----------|-----------|-----------|
| S    | -3.715215 | 0.360603  | -0.000253 |
| S    | -2.785175 | -1.549294 | -0.005687 |
| N    | 0.005400  | 1.287054  | -0.004461 |
| N    | -2.326301 | 1.285759  | 0.000809  |
| C    | -0.007811 | -1.541174 | -0.004029 |
| C    | 0.052832  | 2.745587  | -0.006412 |
| C    | -1.208449 | 0.619357  | -0.002298 |
| C    | -1.196960 | -0.823778 | -0.004196 |
| H    | -0.015360 | -2.624906 | -0.005152 |
| H    | -0.965703 | 3.124620  | -0.029539 |
| H    | 0.601219  | 3.092903  | -0.885109 |
| S    | 2.773831  | -1.570507 | 0.000631  |
| S    | 3.711488  | 0.338547  | 0.007933  |
| N    | 2.323879  | 1.270821  | 0.005624  |
| C    | 1.187646  | -0.840036 | -0.001554 |
| C    | 1.207257  | 0.603248  | 0.000265  |
| H    | 0.563200  | 3.098991  | 0.892760  |

BIPY<sup>2+</sup>-CBPQT<sup>4+</sup>

| Atom | X         | Y         | Z         |
|------|-----------|-----------|-----------|
| N    | 2.846184  | 3.567802  | 1.387794  |
| N    | -2.614710 | -3.636715 | -1.716942 |
| N    | -3.521115 | 3.006820  | -1.323581 |
| N    | 3.953651  | -3.042584 | 0.469308  |
| C    | 4.229254  | 3.253256  | 1.855597  |
| C    | -4.030646 | -3.346240 | -2.094357 |

|   |           |           |           |
|---|-----------|-----------|-----------|
| C | 1.802515  | 3.144152  | 2.127105  |
| C | -1.633389 | -3.295967 | -2.574706 |
| C | 0.515563  | 3.234982  | 1.647463  |
| C | -0.310358 | -3.389101 | -2.209086 |
| C | 0.284142  | 3.764911  | 0.373152  |
| C | 0.034127  | -3.848407 | -0.932007 |
| C | 1.374576  | 4.279755  | -0.330862 |
| C | -1.002897 | -4.281324 | -0.101970 |
| C | 2.645660  | 4.163311  | 0.197128  |
| C | -2.315644 | -4.154970 | -0.512372 |
| C | -1.066473 | 3.653845  | -0.234832 |
| C | 1.438056  | -3.738791 | -0.449070 |
| C | -2.222897 | 3.661523  | 0.548749  |
| C | 2.503494  | -3.548706 | -1.334905 |
| C | -3.435798 | 3.329102  | -0.019184 |
| C | 3.744311  | -3.187500 | -0.851959 |
| C | -2.438898 | 3.086856  | -2.122397 |
| C | 2.981023  | -3.339820 | 1.351243  |
| C | -1.204220 | 3.413128  | -1.605983 |
| C | 1.720547  | -3.691407 | 0.920869  |
| C | -4.783965 | 2.429580  | -1.872425 |
| C | 5.218070  | -2.426521 | 0.966286  |
| C | -4.662617 | 0.922512  | -1.945984 |
| C | 5.008414  | -0.946626 | 1.209890  |
| C | -4.780157 | 0.148761  | -0.786751 |
| C | 5.163317  | -0.029013 | 0.166838  |
| C | -4.590335 | -1.227345 | -0.834765 |
| C | 4.928520  | 1.324829  | 0.379413  |
| C | -4.292568 | -1.856509 | -2.048030 |
| C | 4.530555  | 1.785532  | 1.638162  |
| C | -4.221907 | -1.090117 | -3.211173 |
| C | 4.401092  | 0.873085  | 2.685526  |



|   |           |           |           |
|---|-----------|-----------|-----------|
| C | -4.398862 | 0.291479  | -3.159965 |
| C | 4.638812  | -0.483256 | 2.472562  |
| H | 4.284282  | 3.528372  | 2.909377  |
| H | -4.186154 | -3.756695 | -3.092729 |
| H | 4.909729  | 3.896525  | 1.298068  |
| H | -4.665671 | -3.893719 | -1.398614 |
| H | 2.027944  | 2.693998  | 3.084480  |
| H | -1.937339 | -2.910027 | -3.538910 |
| H | -0.283939 | 2.840374  | 2.262044  |
| H | 0.428993  | -3.054287 | -2.924144 |
| H | 1.263545  | 4.755339  | -1.297151 |
| H | -0.826103 | -4.706883 | 0.876935  |
| H | 3.522215  | 4.514814  | -0.330272 |
| H | -3.144487 | -4.446898 | 0.118781  |
| H | -2.202123 | 3.901601  | 1.604401  |
| H | 2.392328  | -3.644523 | -2.406679 |
| H | -4.349712 | 3.287116  | 0.558423  |
| H | 4.579261  | -2.977891 | -1.507340 |
| H | -2.581537 | 2.843953  | -3.167358 |
| H | 3.224912  | -3.243961 | 2.401291  |
| H | -0.356288 | 3.421758  | -2.279562 |
| H | 0.965009  | -3.858979 | 1.676980  |
| H | -4.947235 | 2.875530  | -2.853600 |
| H | 5.498196  | -2.955702 | 1.877590  |
| H | -5.594731 | 2.745951  | -1.215852 |
| H | 5.984695  | -2.612876 | 0.214335  |
| H | -5.032244 | 0.617179  | 0.161018  |
| H | 5.483881  | -0.364971 | -0.815169 |
| H | -4.686381 | -1.808606 | 0.077597  |
| H | 5.071269  | 2.024733  | -0.438827 |
| H | -4.033428 | -1.564571 | -4.169664 |
| H | 4.132263  | 1.213390  | 3.681267  |

|   |           |           |           |
|---|-----------|-----------|-----------|
| H | -4.335932 | 0.869113  | -4.077086 |
| H | 4.547139  | -1.173636 | 3.305561  |
| N | -1.649014 | -0.702152 | 3.870530  |
| C | -2.451150 | -0.333717 | 2.853839  |
| H | -3.501873 | -0.209931 | 3.080863  |
| C | -1.939013 | -0.123662 | 1.593000  |
| H | -2.623758 | 0.191069  | 0.818204  |
| C | -0.572718 | -0.292013 | 1.352341  |
| C | 0.231078  | -0.672994 | 2.429009  |
| H | 1.297701  | -0.821087 | 2.333574  |
| C | -0.330101 | -0.872488 | 3.673440  |
| H | 0.259133  | -1.170172 | 4.530220  |
| C | -2.239010 | -0.945835 | 5.202518  |
| H | -2.978088 | -0.172265 | 5.404055  |
| H | -1.450903 | -0.905957 | 5.951092  |
| N | 1.049116  | 0.345548  | -2.534715 |
| C | 1.856220  | 0.392822  | -1.458821 |
| H | 2.902582  | 0.592533  | -1.647334 |
| C | 1.358272  | 0.194555  | -0.190118 |
| H | 2.059972  | 0.254098  | 0.633060  |
| C | -0.003810 | -0.065857 | -0.002616 |
| C | -0.812757 | -0.111349 | -1.141637 |
| H | -1.872742 | -0.331240 | -1.089911 |
| C | -0.264781 | 0.101423  | -2.390247 |
| H | -0.859864 | 0.077185  | -3.293659 |
| C | 1.637453  | 0.550126  | -3.874075 |
| H | 2.348577  | -0.253343 | -4.065251 |
| H | 0.843755  | 0.531029  | -4.617010 |
| H | -2.708485 | -1.929828 | 5.199028  |
| H | 2.138891  | 1.517155  | -3.888701 |

| Atom | X         | Y         | Z         |
|------|-----------|-----------|-----------|
| N    | 2.937793  | 3.607844  | 1.283319  |
| N    | -2.667700 | -3.626487 | -1.745124 |
| N    | -3.720215 | 2.863216  | -0.876783 |
| N    | 3.576704  | -2.984367 | 1.246012  |
| C    | 4.326069  | 3.344493  | 1.710464  |
| C    | -4.032155 | -3.354889 | -2.281510 |
| C    | 1.930418  | 3.548594  | 2.196031  |
| C    | -1.598352 | -3.231082 | -2.461842 |
| C    | 0.621015  | 3.527103  | 1.813784  |
| C    | -0.333726 | -3.274021 | -1.920246 |
| C    | 0.257883  | 3.540722  | 0.437564  |
| C    | -0.157299 | -3.722270 | -0.607599 |
| C    | 1.340452  | 3.682819  | -0.475901 |
| C    | -1.272900 | -4.202126 | 0.081116  |
| C    | 2.633297  | 3.701407  | -0.039683 |
| C    | -2.517386 | -4.139481 | -0.510115 |
| C    | -1.100646 | 3.385040  | -0.000186 |
| C    | 1.163075  | -3.582615 | 0.052831  |
| C    | -2.170531 | 3.137110  | 0.905912  |
| C    | 2.354541  | -3.647017 | -0.672047 |
| C    | -3.431560 | 2.877156  | 0.453113  |
| C    | 3.547075  | -3.338203 | -0.051864 |
| C    | -2.742102 | 3.163240  | -1.774031 |
| C    | 2.451752  | -2.983369 | 1.986069  |
| C    | -1.465576 | 3.430943  | -1.375312 |
| C    | 1.234449  | -3.281589 | 1.416573  |
| C    | -5.002785 | 2.312820  | -1.357306 |
| C    | 4.832924  | -2.453184 | 1.849139  |
| C    | -4.848605 | 0.830553  | -1.622511 |
| C    | 4.788698  | -0.942283 | 1.839508  |

|   |           |           |           |
|---|-----------|-----------|-----------|
| C | -4.919721 | -0.082071 | -0.565546 |
| C | 4.999792  | -0.244350 | 0.647322  |
| C | -4.681872 | -1.432680 | -0.784393 |
| C | 4.883804  | 1.139683  | 0.615195  |
| C | -4.368163 | -1.896470 | -2.065273 |
| C | 4.559066  | 1.850249  | 1.774583  |
| C | -4.322849 | -0.992654 | -3.125397 |
| C | 4.379242  | 1.154978  | 2.969950  |
| C | -4.563597 | 0.362369  | -2.904591 |
| C | 4.489954  | -0.233838 | 3.002429  |
| H | 4.473161  | 3.817600  | 2.682637  |
| H | -4.029210 | -3.624387 | -3.337942 |
| H | 4.992766  | 3.827960  | 0.994743  |
| H | -4.720861 | -4.021014 | -1.761489 |
| H | 2.226243  | 3.508659  | 3.236652  |
| H | -1.789830 | -2.850561 | -3.456464 |
| H | -0.119839 | 3.490808  | 2.601208  |
| H | 0.492477  | -2.912724 | -2.519567 |
| H | 1.182350  | 3.764598  | -1.542526 |
| H | -1.199150 | -4.617660 | 1.078153  |
| H | 3.469200  | 3.778326  | -0.722861 |
| H | -3.413336 | -4.475220 | -0.005145 |
| H | -2.023588 | 3.129540  | 1.977374  |
| H | 2.378972  | -3.924846 | -1.718120 |
| H | -4.250839 | 2.660027  | 1.126104  |
| H | 4.491330  | -3.350469 | -0.579356 |
| H | -3.031192 | 3.165960  | -2.817467 |
| H | 2.553493  | -2.706833 | 3.027288  |
| H | -0.748932 | 3.668545  | -2.149968 |
| H | 0.350505  | -3.227529 | 2.039559  |
| H | -5.283622 | 2.856959  | -2.260432 |
| H | 4.906362  | -2.859262 | 2.859262  |

|   |           |           |           |
|---|-----------|-----------|-----------|
| H | -5.757280 | 2.511463  | -0.594504 |
| H | 5.664053  | -2.847293 | 1.264203  |
| H | -5.167648 | 0.257477  | 0.436214  |
| H | 5.259803  | -0.775566 | -0.263997 |
| H | -4.746874 | -2.123426 | 0.051343  |
| H | 5.053919  | 1.665376  | -0.320024 |
| H | -4.104862 | -1.337821 | -4.131802 |
| H | 4.151139  | 1.691918  | 3.886264  |
| H | -4.528835 | 1.052666  | -3.742367 |
| H | 4.344700  | -0.757953 | 3.942515  |
| N | -0.784039 | -0.028007 | 3.434772  |
| C | 0.485013  | 0.210225  | 3.042962  |
| H | 1.218921  | 0.340951  | 3.828081  |
| C | 0.813479  | 0.283736  | 1.710622  |
| H | 1.851281  | 0.479473  | 1.473175  |
| C | -0.173575 | 0.121158  | 0.724400  |
| C | -1.474968 | -0.151964 | 1.170441  |
| H | -2.295345 | -0.337518 | 0.490158  |
| C | -1.752039 | -0.216580 | 2.517331  |
| H | -2.747731 | -0.417527 | 2.889300  |
| C | -1.087833 | -0.082537 | 4.876577  |
| H | -0.540745 | -0.913735 | 5.321447  |
| H | -2.157005 | -0.230564 | 5.008884  |
| N | 0.710822  | 0.558682  | -3.417198 |
| C | -0.565280 | 0.407733  | -3.015444 |
| H | -1.326983 | 0.423481  | -3.783650 |
| C | -0.874593 | 0.244085  | -1.684304 |
| H | -1.922049 | 0.128040  | -1.437487 |
| C | 0.137073  | 0.244610  | -0.712731 |
| C | 1.457523  | 0.379985  | -1.173099 |
| H | 2.310346  | 0.346735  | -0.508295 |
| C | 1.713993  | 0.539197  | -2.514076 |

|   |           |           |           |
|---|-----------|-----------|-----------|
| H | 2.717730  | 0.654287  | -2.902837 |
| C | 1.031336  | 0.752964  | -4.843019 |
| H | 0.114896  | 0.681893  | -5.424201 |
| H | 1.476958  | 1.739438  | -4.971187 |
| H | -0.786484 | 0.859533  | 5.334445  |
| H | 1.729608  | -0.022738 | -5.156389 |

BIPY<sup>2+</sup>-CBPQT<sup>2(•+)</sup>(T)

| Atom | X         | Y         | Z         |
|------|-----------|-----------|-----------|
| N    | 2.920036  | 3.559052  | 1.206661  |
| N    | -2.944663 | -3.584786 | -1.331584 |
| N    | -3.792654 | 2.824134  | -0.851263 |
| N    | 3.773083  | -2.850279 | 0.709092  |
| C    | 4.330266  | 3.375978  | 1.598146  |
| C    | -4.355436 | -3.402328 | -1.721306 |
| C    | 1.931258  | 3.391150  | 2.129198  |
| C    | -1.957720 | -3.420809 | -2.256824 |
| C    | 0.621109  | 3.305907  | 1.766627  |
| C    | -0.646747 | -3.335645 | -1.897478 |
| C    | 0.227792  | 3.374295  | 0.396460  |
| C    | -0.250360 | -3.400686 | -0.528050 |
| C    | 1.292696  | 3.588203  | -0.528237 |
| C    | -1.313498 | -3.609928 | 0.399739  |
| C    | 2.587187  | 3.663344  | -0.110384 |
| C    | -2.609078 | -3.684743 | -0.014966 |
| C    | -1.130747 | 3.227225  | -0.020400 |
| C    | 1.109332  | -3.253877 | -0.115053 |
| C    | -2.197202 | 3.014944  | 0.902966  |
| C    | 2.172838  | -3.038205 | -1.041066 |
| C    | -3.474111 | 2.812087  | 0.473218  |
| C    | 3.450689  | -2.834735 | -0.614444 |

|   |           |           |           |
|---|-----------|-----------|-----------|
| C | -2.811862 | 3.062233  | -1.766895 |
| C | 2.795625  | -3.094070 | 1.626927  |
| C | -1.518359 | 3.267794  | -1.393214 |
| C | 1.501285  | -3.299649 | 1.256454  |
| C | -5.113633 | 2.341560  | -1.296672 |
| C | 5.094114  | -2.365823 | 1.152107  |
| C | -5.066041 | 0.838978  | -1.454450 |
| C | 5.044073  | -0.863781 | 1.314545  |
| C | -5.412358 | 0.001235  | -0.393660 |
| C | 5.387933  | -0.021890 | 0.256277  |
| C | -5.230705 | -1.375299 | -0.496202 |
| C | 5.205445  | 1.354128  | 0.364185  |
| C | -4.700623 | -1.932003 | -1.660570 |
| C | 4.676618  | 1.906174  | 1.531346  |
| C | -4.394302 | -1.097073 | -2.737372 |
| C | 4.372131  | 1.067004  | 2.605379  |
| C | -4.575486 | 0.276713  | -2.634943 |
| C | 4.554307  | -0.306201 | 2.497579  |
| H | 4.451014  | 3.777241  | 2.605864  |
| H | -4.478285 | -3.808333 | -2.726886 |
| H | 4.946707  | 3.970913  | 0.922180  |
| H | -4.971182 | -3.993424 | -1.041383 |
| H | 2.245945  | 3.327542  | 3.163057  |
| H | -2.274588 | -3.360621 | -3.290217 |
| H | -0.101027 | 3.183569  | 2.562645  |
| H | 0.073879  | -3.217205 | -2.695450 |
| H | 1.114518  | 3.692757  | -1.590007 |
| H | -1.133434 | -3.710213 | 1.461615  |
| H | 3.407296  | 3.805302  | -0.802726 |
| H | -3.427780 | -3.822770 | 0.679859  |
| H | -2.031829 | 2.998736  | 1.971870  |
| H | 2.004249  | -3.018658 | -2.109431 |

|   |           |           |           |
|---|-----------|-----------|-----------|
| H | -4.289987 | 2.627963  | 1.160733  |
| H | 4.264346  | -2.647233 | -1.303680 |
| H | -3.118154 | 3.077984  | -2.805000 |
| H | 3.105854  | -3.115358 | 2.663776  |
| H | -0.804344 | 3.458400  | -2.183024 |
| H | 0.789831  | -3.495157 | 2.047342  |
| H | -5.349585 | 2.840537  | -2.238043 |
| H | 5.334073  | -2.867089 | 2.091265  |
| H | -5.851538 | 2.651201  | -0.554758 |
| H | 5.830641  | -2.671491 | 0.407193  |
| H | -5.822340 | 0.420675  | 0.520883  |
| H | 5.796481  | -0.437574 | -0.660613 |
| H | -5.501441 | -2.014850 | 0.339412  |
| H | 5.474159  | 1.996735  | -0.469746 |
| H | -4.009402 | -1.516879 | -3.662369 |
| H | 3.987646  | 1.483152  | 3.532232  |
| H | -4.331219 | 0.911567  | -3.482086 |
| H | 4.311577  | -0.944341 | 3.342667  |
| N | -1.569183 | -0.444466 | 3.055357  |
| C | -0.233293 | -0.263912 | 2.987941  |
| H | 0.301549  | -0.261158 | 3.928691  |
| C | 0.399634  | -0.090685 | 1.780797  |
| H | 1.472031  | 0.050201  | 1.806638  |
| C | -0.338897 | -0.100408 | 0.585146  |
| C | -1.722934 | -0.289096 | 0.696810  |
| H | -2.383211 | -0.308388 | -0.160734 |
| C | -2.308365 | -0.456691 | 1.931486  |
| H | -3.374028 | -0.603695 | 2.046080  |
| C | -2.201861 | -0.609520 | 4.376407  |
| H | -1.724082 | -1.441163 | 4.893581  |
| H | -3.260100 | -0.819805 | 4.239162  |
| N | 1.540790  | 0.417670  | -3.199540 |



|   |           |           |           |
|---|-----------|-----------|-----------|
| C | 0.208656  | 0.230105  | -3.132405 |
| H | -0.333117 | 0.218807  | -4.068481 |
| C | -0.423994 | 0.059904  | -1.921699 |
| H | -1.495632 | -0.085715 | -1.948341 |
| C | 0.311978  | 0.078025  | -0.727472 |
| C | 1.697380  | 0.273827  | -0.838973 |
| H | 2.356445  | 0.300707  | 0.019140  |
| C | 2.280178  | 0.439747  | -2.072208 |
| H | 3.344847  | 0.592680  | -2.194221 |
| C | 2.216681  | 0.591966  | -4.498145 |
| H | 1.471001  | 0.586713  | -5.289758 |
| H | 2.743896  | 1.545814  | -4.494563 |
| H | -2.076351 | 0.313829  | 4.942144  |
| H | 2.917923  | -0.230089 | -4.642931 |

# BIPY<sup>2+</sup>-CBPQT<sup>2(•+)</sup>(S)

| Atom | X         | Y         | Z         |
|------|-----------|-----------|-----------|
| N    | 2.957162  | 3.588185  | 1.378170  |
| N    | -2.889617 | -3.507919 | -1.339601 |
| N    | -3.670491 | 2.858181  | -0.940687 |
| N    | 3.736971  | -2.779959 | 0.983059  |
| C    | 4.350635  | 3.418182  | 1.833756  |
| C    | -4.283047 | -3.339007 | -1.795768 |
| C    | 1.930787  | 3.450887  | 2.262048  |
| C    | -1.862980 | -3.367942 | -2.222768 |
| C    | 0.636101  | 3.361238  | 1.845476  |
| C    | -0.568516 | -3.278181 | -1.805466 |
| C    | 0.302799  | 3.390528  | 0.459472  |
| C    | -0.235764 | -3.310077 | -0.419424 |
| C    | 1.406267  | 3.571464  | -0.425070 |
| C    | -1.339559 | -3.492486 | 0.464405  |

|   |           |           |           |
|---|-----------|-----------|-----------|
| C | 2.682122  | 3.654379  | 0.046417  |
| C | -2.615155 | -3.575781 | -0.007827 |
| C | -1.039931 | 3.240836  | -0.011243 |
| C | 1.106818  | -3.161148 | 0.052083  |
| C | -2.139408 | 3.029935  | 0.871554  |
| C | 2.207232  | -2.952830 | -0.830191 |
| C | -3.401046 | 2.837891  | 0.393843  |
| C | 3.468673  | -2.761428 | -0.351704 |
| C | -2.655431 | 3.085042  | -1.819488 |
| C | 2.721105  | -3.005151 | 1.861361  |
| C | -1.374628 | 3.281197  | -1.396619 |
| C | 1.440466  | -3.200707 | 1.437746  |
| C | -4.986882 | 2.407797  | -1.433581 |
| C | 5.053082  | -2.329286 | 1.476492  |
| C | -4.969069 | 0.904741  | -1.588466 |
| C | 5.035175  | -0.826071 | 1.630039  |
| C | -5.316513 | 0.083115  | -0.515435 |
| C | 5.383209  | -0.005429 | 0.556427  |
| C | -5.149716 | -1.294844 | -0.603491 |
| C | 5.216549  | 1.372615  | 0.643210  |
| C | -4.633271 | -1.869384 | -1.765366 |
| C | 4.699685  | 1.948252  | 1.804348  |
| C | -4.330466 | -1.051917 | -2.855814 |
| C | 4.396042  | 1.131773  | 2.895274  |
| C | -4.497681 | 0.325604  | -2.767974 |
| C | 4.563027  | -0.245865 | 2.808704  |
| H | 4.427660  | 3.837851  | 2.838050  |
| H | -4.359218 | -3.758020 | -2.800398 |
| H | 4.992244  | 4.003254  | 1.172683  |
| H | -4.924399 | -3.925150 | -1.135401 |
| H | 2.200565  | 3.415331  | 3.309777  |
| H | -2.132280 | -3.330364 | -3.270539 |

|   |           |           |           |
|---|-----------|-----------|-----------|
| H | -0.119938 | 3.267592  | 2.613434  |
| H | 0.187700  | -3.181931 | -2.572930 |
| H | 1.273421  | 3.646259  | -1.495713 |
| H | -1.207090 | -3.569302 | 1.534944  |
| H | 3.531772  | 3.772724  | -0.613644 |
| H | -3.464981 | -3.696231 | 0.651629  |
| H | -2.013752 | 3.009940  | 1.945540  |
| H | 2.082485  | -2.934443 | -1.904307 |
| H | -4.242525 | 2.659069  | 1.050667  |
| H | 4.310870  | -2.584360 | -1.008082 |
| H | -2.922449 | 3.099764  | -2.868514 |
| H | 2.987313  | -3.018706 | 2.910600  |
| H | -0.630393 | 3.467015  | -2.159250 |
| H | 0.695382  | -3.384493 | 2.200043  |
| H | -5.178533 | 2.913092  | -2.381448 |
| H | 5.244068  | -2.833806 | 2.424902  |
| H | -5.741614 | 2.735257  | -0.716410 |
| H | 5.808263  | -2.657377 | 0.760080  |
| H | -5.714228 | 0.516658  | 0.397662  |
| H | 5.781339  | -0.439825 | -0.356084 |
| H | -5.417360 | -1.921283 | 0.242826  |
| H | 5.484739  | 1.998327  | -0.203470 |
| H | -3.952501 | -1.486863 | -3.776856 |
| H | 4.017633  | 1.567532  | 3.815754  |
| H | -4.248951 | 0.949486  | -3.622180 |
| H | 4.313738  | -0.868950 | 3.663330  |
| N | -0.958511 | -0.273116 | 3.379609  |
| C | 0.343535  | -0.089824 | 3.073928  |
| H | 1.035750  | -0.043986 | 3.904901  |
| C | 0.755171  | 0.031145  | 1.769501  |
| H | 1.814075  | 0.175924  | 1.604335  |
| C | -0.176106 | -0.031383 | 0.718495  |

|   |           |           |           |
|---|-----------|-----------|-----------|
| C | -1.519756 | -0.228666 | 1.076350  |
| H | -2.316394 | -0.292615 | 0.347604  |
| C | -1.880195 | -0.344990 | 2.399096  |
| H | -2.908218 | -0.495422 | 2.700220  |
| C | -1.348407 | -0.386947 | 4.795900  |
| H | -0.842649 | -1.247689 | 5.233626  |
| H | -2.425893 | -0.520998 | 4.860315  |
| N | 1.019127  | 0.379971  | -3.346036 |
| C | -0.279992 | 0.187423  | -3.043256 |
| H | -0.976282 | 0.148685  | -3.870565 |
| C | -0.690726 | 0.050614  | -1.737914 |
| H | -1.749881 | -0.094248 | -1.574293 |
| C | 0.239022  | 0.105492  | -0.687270 |
| C | 1.584697  | 0.302663  | -1.043865 |
| H | 2.381509  | 0.358693  | -0.314666 |
| C | 1.942942  | 0.434891  | -2.363571 |
| H | 2.969918  | 0.586613  | -2.668856 |
| C | 1.448033  | 0.488402  | -4.751267 |
| H | 0.593491  | 0.773065  | -5.361949 |
| H | 2.220718  | 1.252174  | -4.826969 |
| H | -1.059205 | 0.527161  | 5.314828  |
| H | 1.837856  | -0.476815 | -5.077572 |

---

BIPY<sup>2+</sup>-CBPQT<sup>•+</sup>

| Atom | X         | Y         | Z         |
|------|-----------|-----------|-----------|
| N    | -3.508138 | 3.176399  | -0.245535 |
| N    | 3.513238  | -3.241280 | 0.107111  |
| N    | 3.536608  | 3.136305  | 0.397626  |
| N    | -3.544576 | -3.210541 | -0.243813 |
| C    | -4.947147 | 2.895998  | -0.372316 |
| C    | 4.955180  | -2.951069 | 0.192677  |

|   |           |           |           |
|---|-----------|-----------|-----------|
| C | -2.709526 | 3.181079  | -1.355102 |
| C | 2.762761  | -3.304327 | 1.245407  |
| C | -1.353514 | 3.181225  | -1.264018 |
| C | 1.403361  | -3.326911 | 1.206958  |
| C | -0.691114 | 3.141272  | 0.008717  |
| C | 0.694687  | -3.276658 | -0.032979 |
| C | -1.569970 | 3.152312  | 1.137978  |
| C | 1.522292  | -3.223850 | -1.196609 |
| C | -2.921543 | 3.156838  | 0.986491  |
| C | 2.878830  | -3.197000 | -1.099928 |
| C | 0.719563  | 3.133436  | 0.140803  |
| C | -0.726420 | -3.272351 | -0.103164 |
| C | 1.599205  | 3.208728  | -0.985341 |
| C | -1.555407 | -3.288813 | 1.060692  |
| C | 2.950983  | 3.195741  | -0.833250 |
| C | -2.911799 | -3.246571 | 0.964356  |
| C | 2.737023  | 3.077981  | 1.505303  |
| C | -2.792710 | -3.211112 | -1.383090 |
| C | 1.381354  | 3.090932  | 1.413766  |
| C | -1.433771 | -3.244244 | -1.344600 |
| C | 4.973279  | 2.837816  | 0.509665  |
| C | -4.983403 | -2.901904 | -0.315828 |
| C | 5.170118  | 1.340747  | 0.446511  |
| C | -5.167317 | -1.402470 | -0.347967 |
| C | 5.357042  | 0.701183  | -0.779300 |
| C | -5.359994 | -0.684884 | 0.832116  |
| C | 5.346765  | -0.688507 | -0.856726 |
| C | -5.357930 | 0.707081  | 0.816871  |
| C | 5.153953  | -1.456584 | 0.291464  |
| C | -5.157252 | 1.399489  | -0.377578 |
| C | 5.025784  | -0.817035 | 1.525744  |
| C | -5.018569 | 0.679912  | -1.566010 |

|   |           |           |           |
|---|-----------|-----------|-----------|
| C | 5.031630  | 0.569842  | 1.602370  |
| C | -5.026482 | -0.709026 | -1.551521 |
| H | -5.301079 | 3.359773  | -1.295053 |
| H | 5.349622  | -3.472260 | 1.066989  |
| H | -5.459012 | 3.375302  | 0.464633  |
| H | 5.434713  | -3.368121 | -0.694733 |
| H | -3.220787 | 3.199709  | -2.309506 |
| H | 3.311442  | -3.338211 | 2.177989  |
| H | -0.800135 | 3.219598  | -2.192206 |
| H | 0.888134  | -3.387898 | 2.156089  |
| H | -1.189945 | 3.162056  | 2.150874  |
| H | 1.100721  | -3.183785 | -2.191918 |
| H | -3.594214 | 3.155280  | 1.835166  |
| H | 3.517062  | -3.133485 | -1.972208 |
| H | 1.219741  | 3.285182  | -1.995669 |
| H | -1.134783 | -3.317683 | 2.056909  |
| H | 3.624404  | 3.242436  | -1.680061 |
| H | -3.551310 | -3.233048 | 1.838005  |
| H | 3.247496  | 3.035915  | 2.459375  |
| H | -3.340421 | -3.186430 | -2.316523 |
| H | 0.827358  | 3.074932  | 2.342272  |
| H | -0.917680 | -3.251802 | -2.295138 |
| H | 5.332461  | 3.256104  | 1.452023  |
| H | -5.383482 | -3.379520 | -1.212302 |
| H | 5.488644  | 3.350133  | -0.305258 |
| H | -5.467240 | -3.352547 | 0.552591  |
| H | 5.500116  | 1.286333  | -1.683768 |
| H | -5.501597 | -1.210825 | 1.772378  |
| H | 5.478847  | -1.173816 | -1.819906 |
| H | -5.502260 | 1.252167  | 1.745735  |
| H | 4.910000  | -1.400438 | 2.434802  |
| H | -4.894047 | 1.203205  | -2.509799 |

|   |           |           |           |
|---|-----------|-----------|-----------|
| H | 4.916832  | 1.052316  | 2.568753  |
| H | -4.911449 | -1.251939 | -2.485327 |
| N | 1.097386  | 0.213776  | -3.363391 |
| C | -0.232434 | 0.202536  | -3.074785 |
| H | -0.905582 | 0.207149  | -3.922424 |
| C | -0.685349 | 0.173709  | -1.788500 |
| H | -1.756473 | 0.131713  | -1.645251 |
| C | 0.223481  | 0.173160  | -0.688839 |
| C | 1.601126  | 0.168958  | -1.040089 |
| H | 2.384698  | 0.138907  | -0.293413 |
| C | 1.996723  | 0.198376  | -2.346356 |
| H | 3.041681  | 0.200437  | -2.629491 |
| C | 1.560856  | 0.321962  | -4.748408 |
| H | 0.800856  | -0.083817 | -5.415185 |
| H | 2.481223  | -0.250215 | -4.865744 |
| N | -1.094278 | -0.004995 | 3.343930  |
| C | 0.235463  | -0.002447 | 3.054859  |
| H | 0.908677  | -0.060606 | 3.900456  |
| C | 0.688221  | 0.060635  | 1.769799  |
| H | 1.759709  | 0.036275  | 1.625008  |
| C | -0.220468 | 0.132076  | 0.672438  |
| C | -1.598151 | 0.116992  | 1.023380  |
| H | -2.382384 | 0.153682  | 0.277508  |
| C | -1.993286 | 0.053560  | 2.328724  |
| H | -3.038036 | 0.035521  | 2.611600  |
| C | -1.556848 | -0.157830 | 4.725400  |
| H | -0.802734 | 0.240317  | 5.403460  |
| H | -2.484672 | 0.398772  | 4.857232  |
| H | 1.744629  | 1.370093  | -4.995919 |
| H | -1.727068 | -1.214409 | 4.944353  |

| Atom | X         | Y         | Z         |
|------|-----------|-----------|-----------|
| N    | 2.935846  | 3.523318  | 1.539529  |
| N    | -2.836689 | -3.559297 | -1.475690 |
| N    | -3.582851 | 2.864397  | -1.210991 |
| N    | 3.684367  | -2.896270 | 1.268879  |
| C    | 4.284297  | 3.326269  | 2.075509  |
| C    | -4.184954 | -3.360370 | -2.011207 |
| C    | 1.842050  | 3.303377  | 2.348586  |
| C    | -1.742840 | -3.341589 | -2.285503 |
| C    | 0.595001  | 3.140559  | 1.853066  |
| C    | -0.495786 | -3.177704 | -1.790709 |
| C    | 0.325806  | 3.148579  | 0.428499  |
| C    | -0.226041 | -3.182500 | -0.365959 |
| C    | 1.516851  | 3.339409  | -0.380335 |
| C    | -1.416892 | -3.372871 | 0.443570  |
| C    | 2.737380  | 3.501806  | 0.174468  |
| C    | -2.637565 | -3.535628 | -0.110537 |
| C    | -0.946242 | 3.017184  | -0.108361 |
| C    | 1.046126  | -3.049516 | 0.169652  |
| C    | -2.140105 | 2.844608  | 0.700492  |
| C    | 2.238808  | -2.874297 | -0.640502 |
| C    | -3.369835 | 2.763597  | 0.148767  |
| C    | 3.469286  | -2.793341 | -0.090401 |
| C    | -2.476016 | 2.981441  | -2.023924 |
| C    | 2.578421  | -3.013160 | 2.083252  |
| C    | -1.220724 | 3.073154  | -1.531071 |
| C    | 1.322505  | -3.104668 | 1.592037  |
| C    | -4.852886 | 2.404284  | -1.776491 |
| C    | 4.955325  | -2.437272 | 1.833179  |
| C    | -4.851900 | 0.898424  | -1.904497 |
| C    | 4.954915  | -0.931623 | 1.963454  |



|   |           |           |           |
|---|-----------|-----------|-----------|
| C | -5.143052 | 0.104207  | -0.792409 |
| C | 5.245093  | -0.135800 | 0.852250  |
| C | -4.983421 | -1.273886 | -0.848378 |
| C | 5.084756  | 1.242109  | 0.910112  |
| C | -4.530046 | -1.889059 | -2.017870 |
| C | 4.631568  | 1.855499  | 2.080631  |
| C | -4.284339 | -1.101646 | -3.143059 |
| C | 4.387616  | 1.066613  | 3.205151  |
| C | -4.443992 | 0.280589  | -3.086728 |
| C | 4.548079  | -0.315460 | 3.146926  |
| H | 4.315112  | 3.747814  | 3.083381  |
| H | -4.217037 | -3.782939 | -3.018625 |
| H | 4.979129  | 3.897742  | 1.454499  |
| H | -4.880556 | -3.929952 | -1.389299 |
| H | 2.043536  | 3.288068  | 3.413695  |
| H | -1.944535 | -3.328941 | -3.350635 |
| H | -0.204646 | 3.006622  | 2.571364  |
| H | 0.303735  | -3.045745 | -2.509488 |
| H | 1.457108  | 3.376029  | -1.460647 |
| H | -1.356742 | -3.407335 | 1.523974  |
| H | 3.625975  | 3.651152  | -0.427878 |
| H | -3.526059 | -3.683574 | 0.492324  |
| H | -2.079005 | 2.788443  | 1.779867  |
| H | 2.176328  | -2.816378 | -1.719682 |
| H | -4.261461 | 2.640591  | 0.752508  |
| H | 4.359934  | -2.668802 | -0.695273 |
| H | -2.678306 | 3.016951  | -3.088339 |
| H | 2.782104  | -3.048874 | 3.147396  |
| H | -0.419467 | 3.194544  | -2.249842 |
| H | 0.522146  | -3.226184 | 2.311814  |
| H | -4.987400 | 2.886934  | -2.747797 |
| H | 5.091121  | -2.921359 | 2.803594  |

|   |           |           |           |
|---|-----------|-----------|-----------|
| H | -5.657306 | 2.747010  | -1.120249 |
| H | 5.758707  | -2.779221 | 1.175261  |
| H | -5.494006 | 0.565659  | 0.126513  |
| H | 5.595495  | -0.595914 | -0.067545 |
| H | -5.209909 | -1.874481 | 0.028421  |
| H | 5.310234  | 1.843931  | 0.033903  |
| H | -3.956603 | -1.568097 | -4.068747 |
| H | 4.060419  | 1.531730  | 4.131707  |
| H | -4.240387 | 0.881067  | -3.969918 |
| H | 4.345703  | -0.917201 | 4.029561  |
| N | -0.289006 | -0.215466 | 3.538928  |
| C | -1.383657 | -0.309713 | 2.737489  |
| H | -2.332170 | -0.447030 | 3.240770  |
| C | -1.279390 | -0.234396 | 1.378782  |
| H | -2.194585 | -0.315273 | 0.808992  |
| C | -0.015608 | -0.055438 | 0.755593  |
| C | 1.092239  | 0.039306  | 1.624589  |
| H | 2.102916  | 0.179500  | 1.262486  |
| C | 0.929774  | -0.043354 | 2.982811  |
| H | 1.768253  | 0.025742  | 3.662525  |
| C | -0.451599 | -0.323239 | 4.992215  |
| H | -1.165822 | 0.427161  | 5.333937  |
| H | 0.510359  | -0.151910 | 5.472341  |
| N | 0.398477  | 0.177145  | -3.464258 |
| C | 1.491305  | 0.279055  | -2.665099 |
| H | 2.441567  | 0.417502  | -3.163717 |
| C | 1.386752  | 0.207528  | -1.304427 |
| H | 2.302061  | 0.292087  | -0.735466 |
| C | 0.124925  | 0.027289  | -0.680845 |
| C | -0.984639 | -0.071671 | -1.549550 |
| H | -1.994559 | -0.213450 | -1.185894 |
| C | -0.821943 | 0.004898  | -2.905935 |

|   |           |           |           |
|---|-----------|-----------|-----------|
| H | -1.656950 | -0.069014 | -3.590231 |
| C | 0.512407  | 0.275063  | -4.922800 |
| H | 1.565225  | 0.275283  | -5.199843 |
| H | 0.019076  | -0.583017 | -5.381284 |
| H | -0.812184 | -1.322023 | 5.244825  |
| H | 0.044129  | 1.199881  | -5.265068 |

NDI-CBPQT<sup>4+</sup>

| Atom | X         | Y         | Z         |
|------|-----------|-----------|-----------|
| N    | -3.479898 | 3.181909  | 0.026061  |
| N    | 3.483696  | -3.016140 | -0.947708 |
| N    | 3.579465  | 3.135131  | -0.027574 |
| N    | -3.580992 | -2.965916 | -0.981182 |
| C    | -4.968466 | 2.979153  | -0.030028 |
| C    | 4.972274  | -2.807871 | -0.923754 |
| C    | -2.805637 | 3.485321  | -1.098872 |
| C    | 2.810782  | -3.271234 | 0.191403  |
| C    | -1.431105 | 3.607655  | -1.097540 |
| C    | 1.432800  | -3.383327 | 0.201167  |
| C    | -0.697297 | 3.398029  | 0.076401  |
| C    | 0.699947  | -3.232830 | -0.982241 |
| C    | -1.432798 | 3.126107  | 1.236841  |
| C    | 1.437193  | -3.011625 | -2.152956 |
| C    | -2.810366 | 3.023256  | 1.185299  |
| C    | 2.811712  | -2.900168 | -2.108916 |
| C    | 0.800713  | 3.389674  | 0.061213  |
| C    | -0.799520 | -3.229699 | -0.994078 |
| C    | 1.509257  | 3.461383  | -1.144707 |
| C    | -1.555123 | -3.478315 | 0.157605  |
| C    | 2.882242  | 3.328040  | -1.163139 |
| C    | -2.930943 | -3.338066 | 0.138946  |

|   |           |           |           |
|---|-----------|-----------|-----------|
| C | 2.935254  | 3.108047  | 1.155811  |
| C | -2.888647 | -2.774325 | -2.120596 |
| C | 1.560536  | 3.237368  | 1.227194  |
| C | -1.516253 | -2.906758 | -2.154107 |
| C | 5.063215  | 2.899300  | -0.099005 |
| C | -5.063846 | -2.713049 | -0.963845 |
| C | 5.347227  | 1.433169  | -0.346710 |
| C | -5.344754 | -1.238612 | -0.762095 |
| C | 5.244180  | 0.907109  | -1.636719 |
| C | -5.601772 | -0.728481 | 0.513844  |
| C | 5.218025  | -0.468737 | -1.834736 |
| C | -5.575676 | 0.645804  | 0.739762  |
| C | 5.296039  | -1.340152 | -0.746299 |
| C | -5.293419 | 1.527169  | -0.307630 |
| C | 5.566489  | -0.815607 | 0.520644  |
| C | -5.204980 | 1.023479  | -1.607200 |
| C | 5.591919  | 0.562895  | 0.719609  |
| C | -5.232723 | -0.348254 | -1.832799 |
| H | -5.339292 | 3.644401  | -0.810232 |
| H | 5.361536  | -3.418273 | -0.109197 |
| H | -5.368672 | 3.318427  | 0.925225  |
| H | 5.356019  | -3.206777 | -1.863148 |
| H | -3.387551 | 3.626667  | -1.999552 |
| H | 3.397301  | -3.370633 | 1.095346  |
| H | -0.967985 | 3.865679  | -2.039802 |
| H | 0.965697  | -3.570310 | 1.158644  |
| H | -0.967296 | 2.967359  | 2.200247  |
| H | 0.974935  | -2.910915 | -3.125161 |
| H | -3.399167 | 2.798556  | 2.065677  |
| H | 3.395876  | -2.715394 | -3.000504 |
| H | 1.026383  | 3.605270  | -2.101307 |
| H | -1.107409 | -3.772823 | 1.097217  |

|   |           |           |           |
|---|-----------|-----------|-----------|
| H | 3.443356  | 3.361874  | -2.086873 |
| H | -3.530953 | -3.510121 | 1.022907  |
| H | 3.541698  | 2.968843  | 2.041094  |
| H | -3.454028 | -2.503951 | -3.002102 |
| H | 1.115814  | 3.202277  | 2.212662  |
| H | -1.038380 | -2.726428 | -3.106804 |
| H | 5.484083  | 3.250713  | 0.842755  |
| H | -5.451743 | -3.084934 | -1.912803 |
| H | 5.437488  | 3.537530  | -0.900039 |
| H | -5.476840 | -3.324087 | -0.161894 |
| H | 5.120679  | 1.563201  | -2.492064 |
| H | -5.763790 | -1.402110 | 1.349956  |
| H | 5.072121  | -0.852560 | -2.839025 |
| H | -5.717944 | 1.022467  | 1.748313  |
| H | 5.698383  | -1.478943 | 1.370309  |
| H | -5.048904 | 1.691672  | -2.447605 |
| H | 5.743596  | 0.953319  | 1.721579  |
| H | -5.101561 | -0.715711 | -2.845235 |
| C | -1.222417 | 0.091658  | -0.475942 |
| C | -0.000423 | -0.032275 | 0.209321  |
| C | -2.401029 | -0.051104 | 0.211379  |
| C | -1.234112 | 0.384545  | -1.931594 |
| C | 0.000449  | -0.288612 | 1.596767  |
| C | 1.220464  | 0.093899  | -0.477520 |
| C | -1.224111 | -0.431633 | 2.280053  |
| C | 1.225199  | -0.397632 | 2.286149  |
| C | -2.408605 | -0.316669 | 1.593930  |
| C | -1.230451 | -0.708215 | 3.742349  |
| C | 1.236399  | 0.350244  | -1.940903 |
| C | 2.399512  | -0.022315 | 0.213921  |
| C | 1.241674  | -0.667396 | 3.751642  |
| C | 2.408169  | -0.260629 | 1.601387  |

|   |           |           |           |
|---|-----------|-----------|-----------|
| C | -0.030344 | -1.078595 | 5.815603  |
| C | -0.023448 | 0.815548  | -3.996903 |
| H | 3.321224  | 0.075064  | -0.333511 |
| H | 3.344695  | -0.346679 | 2.139165  |
| H | -0.570670 | -0.279733 | 6.325999  |
| H | -3.323042 | 0.050291  | -0.334596 |
| H | -3.344391 | -0.428800 | 2.128533  |
| H | 0.975175  | 1.120875  | -4.297963 |
| H | -0.742632 | 1.609276  | -4.194838 |
| H | -0.317634 | -0.083349 | -4.543033 |
| H | 0.994408  | -1.126378 | 6.173778  |
| H | -0.536477 | -2.028104 | 5.996575  |
| N | 0.003990  | -0.807162 | 4.377634  |
| N | 0.000660  | 0.541564  | -2.557642 |
| O | 2.286586  | -0.762677 | 4.365608  |
| O | 2.274350  | 0.407544  | -2.574370 |
| O | -2.264823 | -0.844202 | 4.366954  |
| O | -2.266486 | 0.489027  | -2.568223 |

NDI-CBPQT<sup>3+</sup>

| Atom | X         | Y         | Z         |
|------|-----------|-----------|-----------|
| N    | -3.486065 | 3.179337  | 0.022227  |
| N    | 3.476600  | -3.018895 | -0.949106 |
| N    | 3.609802  | 3.133673  | -0.013389 |
| N    | -3.587700 | -2.956639 | -0.971081 |
| C    | -4.954170 | 2.979392  | -0.026834 |
| C    | 4.966848  | -2.819666 | -0.928416 |
| C    | -2.782660 | 3.411531  | -1.124641 |
| C    | 2.804853  | -3.266874 | 0.191909  |
| C    | -1.424287 | 3.517118  | -1.131760 |
| C    | 1.426598  | -3.370570 | 0.205187  |

|   |           |           |           |
|---|-----------|-----------|-----------|
| C | -0.650098 | 3.368632  | 0.062906  |
| C | 0.692303  | -3.216329 | -0.976629 |
| C | -1.432636 | 3.168755  | 1.245163  |
| C | 1.427556  | -2.998344 | -2.148861 |
| C | -2.792550 | 3.074013  | 1.195973  |
| C | 2.802684  | -2.895948 | -2.108029 |
| C | 0.777979  | 3.364158  | 0.055549  |
| C | -0.806232 | -3.209172 | -0.985618 |
| C | 1.540805  | 3.486505  | -1.149602 |
| C | -1.560137 | -3.462926 | 0.166172  |
| C | 2.897094  | 3.358804  | -1.156324 |
| C | -2.935955 | -3.327052 | 0.148425  |
| C | 2.928789  | 3.064680  | 1.170447  |
| C | -2.896235 | -2.752876 | -2.108190 |
| C | 1.571275  | 3.180850  | 1.233131  |
| C | -1.523464 | -2.879444 | -2.142764 |
| C | 5.069445  | 2.884422  | -0.077207 |
| C | -5.072245 | -2.711478 | -0.953222 |
| C | 5.360047  | 1.417918  | -0.331088 |
| C | -5.358794 | -1.239746 | -0.751472 |
| C | 5.255262  | 0.895803  | -1.622637 |
| C | -5.601752 | -0.727807 | 0.526215  |
| C | 5.224053  | -0.478652 | -1.828032 |
| C | -5.575197 | 0.647052  | 0.748484  |
| C | 5.299002  | -1.356104 | -0.743968 |
| C | -5.302008 | 1.529141  | -0.300448 |
| C | 5.565321  | -0.838167 | 0.526245  |
| C | -5.227206 | 1.021314  | -1.599407 |
| C | 5.597747  | 0.539668  | 0.729732  |
| C | -5.256785 | -0.350395 | -1.823938 |
| H | -5.342367 | 3.638853  | -0.805781 |
| H | 5.353692  | -3.437844 | -0.118326 |

|   |           |           |           |
|---|-----------|-----------|-----------|
| H | -5.362417 | 3.315252  | 0.927755  |
| H | 5.343850  | -3.216808 | -1.871374 |
| H | -3.364620 | 3.508565  | -2.031847 |
| H | 3.393367  | -3.367124 | 1.094370  |
| H | -0.960425 | 3.711577  | -2.089705 |
| H | 0.959946  | -3.551853 | 1.163885  |
| H | -0.971607 | 3.063807  | 2.218840  |
| H | 0.962793  | -2.891578 | -3.119187 |
| H | -3.385122 | 2.901293  | 2.085935  |
| H | 3.386171  | -2.711587 | -3.000029 |
| H | 1.068472  | 3.667726  | -2.106090 |
| H | -1.110362 | -3.757241 | 1.104791  |
| H | 3.470067  | 3.428853  | -2.071748 |
| H | -3.535725 | -3.502280 | 1.031886  |
| H | 3.529732  | 2.902217  | 2.056574  |
| H | -3.462510 | -2.473415 | -2.986101 |
| H | 1.120038  | 3.109085  | 2.214335  |
| H | -1.045658 | -2.683189 | -3.092421 |
| H | 5.501315  | 3.221366  | 0.866550  |
| H | -5.457072 | -3.086127 | -1.902493 |
| H | 5.469802  | 3.516302  | -0.872505 |
| H | -5.480522 | -3.325711 | -0.151114 |
| H | 5.125961  | 1.559110  | -2.471846 |
| H | -5.750939 | -1.401375 | 1.365164  |
| H | 5.074463  | -0.858379 | -2.833653 |
| H | -5.703119 | 1.026280  | 1.758332  |
| H | 5.687818  | -1.506605 | 1.373763  |
| H | -5.074742 | 1.690178  | -2.440308 |
| H | 5.743625  | 0.926909  | 1.734120  |
| H | -5.132704 | -0.720623 | -2.836555 |
| C | -1.224591 | 0.105247  | -0.482557 |
| C | -0.002511 | -0.019258 | 0.202693  |



|   |           |           |           |
|---|-----------|-----------|-----------|
| C | -2.403866 | -0.036546 | 0.202617  |
| C | -1.237816 | 0.381745  | -1.941261 |
| C | -0.002144 | -0.275476 | 1.589223  |
| C | 1.219191  | 0.104379  | -0.483238 |
| C | -1.227815 | -0.415270 | 2.271799  |
| C | 1.223550  | -0.398260 | 2.275762  |
| C | -2.411736 | -0.297806 | 1.585292  |
| C | -1.234689 | -0.690039 | 3.732021  |
| C | 1.231685  | 0.362898  | -1.944778 |
| C | 2.398409  | -0.022440 | 0.203997  |
| C | 1.239568  | -0.669810 | 3.738495  |
| C | 2.406432  | -0.269086 | 1.589532  |
| C | -0.034810 | -1.066242 | 5.804382  |
| C | -0.000732 | 0.867495  | -3.989546 |
| H | 3.319292  | 0.082429  | -0.342785 |
| H | 3.343409  | -0.360870 | 2.125349  |
| H | -0.570635 | -0.263954 | 6.314409  |
| H | -3.325056 | 0.067124  | -0.343924 |
| H | -3.348241 | -0.404577 | 2.119290  |
| H | 0.893104  | 1.440196  | -4.227824 |
| H | -0.895568 | 1.437291  | -4.230228 |
| H | 0.002344  | -0.065303 | -4.559623 |
| H | 0.989767  | -1.119204 | 6.162418  |
| H | -0.546359 | -2.012415 | 5.988500  |
| N | 0.000463  | -0.797497 | 4.366673  |
| N | -0.002541 | 0.586152  | -2.553785 |
| O | 2.282798  | -0.777200 | 4.355736  |
| O | 2.259089  | 0.378592  | -2.597804 |
| O | -2.267666 | -0.819135 | 4.362749  |
| O | -2.267646 | 0.418032  | -2.590289 |

| Atom | X         | Y         | Z         |
|------|-----------|-----------|-----------|
| N    | -3.556990 | 3.092861  | -0.224739 |
| N    | 3.557941  | -3.092175 | 0.232225  |
| N    | 3.549770  | 3.097964  | 0.222930  |
| N    | -3.548776 | -3.096546 | -0.216096 |
| C    | -5.025205 | 2.877080  | -0.325886 |
| C    | 5.026101  | -2.876099 | 0.333464  |
| C    | -2.785806 | 3.213725  | -1.347083 |
| C    | 2.786651  | -3.212708 | 1.354551  |
| C    | -1.427187 | 3.325864  | -1.288897 |
| C    | 1.428050  | -3.324883 | 1.296248  |
| C    | -0.718524 | 3.316208  | -0.044611 |
| C    | 0.719503  | -3.315466 | 0.051868  |
| C    | -1.575456 | 3.257823  | 1.103395  |
| C    | 1.576563  | -3.257897 | -1.096059 |
| C    | -2.930462 | 3.137874  | 0.989181  |
| C    | 2.931577  | -3.138090 | -0.981742 |
| C    | 0.711005  | 3.317148  | 0.042497  |
| C    | -0.710020 | -3.315904 | -0.035375 |
| C    | 1.567900  | 3.257109  | -1.105396 |
| C    | -1.567054 | -3.255649 | 1.112450  |
| C    | 2.923088  | 3.139407  | -0.991015 |
| C    | -2.922220 | -3.137843 | 0.997921  |
| C    | 2.778527  | 3.220515  | 1.345069  |
| C    | -2.777378 | -3.218748 | -1.338138 |
| C    | 1.419759  | 3.330700  | 1.286720  |
| C    | -1.418613 | -3.329039 | -1.279662 |
| C    | 5.018437  | 2.885479  | 0.324403  |
| C    | -5.017487 | -2.884328 | -0.317709 |
| C    | 5.381344  | 1.411810  | 0.376574  |
| C    | -5.380667 | -1.410722 | -0.369025 |

|   |           |           |           |
|---|-----------|-----------|-----------|
| C | 5.668275  | 0.701434  | -0.790786 |
| C | -5.662112 | -0.700504 | 0.799759  |
| C | 5.670291  | -0.693976 | -0.788547 |
| C | -5.664133 | 0.694829  | 0.797740  |
| C | 5.385367  | -1.401400 | 0.381087  |
| C | -5.384742 | 1.402453  | -0.373098 |
| C | 5.301517  | -0.688758 | 1.582597  |
| C | -5.305951 | 0.690058  | -1.575149 |
| C | 5.299553  | 0.702786  | 1.580356  |
| C | -5.303895 | -0.701576 | -1.573120 |
| H | -5.361016 | 3.398739  | -1.224205 |
| H | 5.361904  | -3.397807 | 1.231774  |
| H | -5.482090 | 3.367303  | 0.535868  |
| H | 5.483195  | -3.366104 | -0.528292 |
| H | -3.314581 | 3.206628  | -2.292023 |
| H | 3.315320  | -3.205511 | 2.299544  |
| H | -0.908457 | 3.412982  | -2.235105 |
| H | 0.909231  | -3.411963 | 2.242414  |
| H | -1.172898 | 3.275644  | 2.108353  |
| H | 1.174067  | -3.276025 | -2.101018 |
| H | -3.569798 | 3.054128  | 1.859029  |
| H | 3.571066  | -3.054937 | -1.851534 |
| H | 1.165183  | 3.271757  | -2.110332 |
| H | -1.164533 | -3.270570 | 2.117468  |
| H | 3.562498  | 3.054549  | -1.860687 |
| H | -3.561707 | -3.053128 | 1.867557  |
| H | 3.307376  | 3.216772  | 2.289984  |
| H | -3.306113 | -3.214528 | -2.283121 |
| H | 0.900972  | 3.419648  | 2.232734  |
| H | -0.899717 | -3.417555 | -2.225654 |
| H | 5.353270  | 3.410827  | 1.220954  |
| H | -5.352118 | -3.409297 | -1.214541 |

|   |           |           |           |
|---|-----------|-----------|-----------|
| H | 5.474130  | 3.373881  | -0.539005 |
| H | -5.473139 | -3.373279 | 0.545419  |
| H | 5.793827  | 1.226838  | -1.732210 |
| H | -5.783492 | -1.226063 | 1.741641  |
| H | 5.797474  | -1.222079 | -1.728255 |
| H | -5.786808 | 1.222767  | 1.738132  |
| H | 5.161290  | -1.217882 | 2.521315  |
| H | -5.169435 | 1.219399  | -2.514294 |
| H | 5.157931  | 1.234457  | 2.517425  |
| H | -5.165863 | -1.233175 | -2.510764 |
| C | -0.742009 | -0.001673 | -1.715028 |
| C | 0.208710  | -0.000815 | -0.679720 |
| C | -2.077831 | -0.000744 | -1.407821 |
| C | -0.306400 | -0.003696 | -3.129200 |
| C | -0.206688 | 0.001222  | 0.667409  |
| C | 1.579454  | -0.001333 | -0.971630 |
| C | -1.577613 | 0.001249  | 0.957626  |
| C | 0.742726  | 0.002943  | 1.703932  |
| C | -2.488007 | 0.000226  | -0.067521 |
| C | -2.038384 | 0.002593  | 2.366284  |
| C | 2.048168  | -0.005354 | -2.379699 |
| C | 2.488803  | 0.001046  | 0.054890  |
| C | 0.314179  | 0.004707  | 3.122174  |
| C | 2.078303  | 0.003082  | 1.394982  |
| C | -1.539446 | 0.005643  | 4.739248  |
| C | 1.478510  | -0.023202 | -4.771913 |
| H | 3.529676  | 0.000672  | -0.199473 |
| H | 2.806690  | 0.004548  | 2.194552  |
| H | -2.146975 | 0.894546  | 4.917883  |
| H | -2.805608 | -0.001101 | -2.208203 |
| H | -3.528297 | 0.000567  | 0.188772  |
| H | 2.562626  | -0.090172 | -4.802944 |

|   |           |           |           |
|---|-----------|-----------|-----------|
| H | 1.145331  | 0.893650  | -5.261963 |
| H | 1.032480  | -0.880562 | -5.278035 |
| H | -0.672073 | 0.006871  | 5.394113  |
| H | -2.145974 | -0.883533 | 4.919948  |
| N | -1.061083 | 0.004305  | 3.358044  |
| N | 1.065658  | -0.014737 | -3.369613 |
| O | 1.116275  | 0.006310  | 4.039581  |
| O | 3.232422  | -0.002101 | -2.668163 |
| O | -3.218326 | 0.002290  | 2.673165  |
| O | -1.094736 | 0.002098  | -4.058843 |

NDI-CBPQT<sup>2(++)</sup>(S)

| Atom | X         | Y         | Z         |
|------|-----------|-----------|-----------|
| N    | 3.546932  | 3.121887  | -0.439177 |
| N    | -3.545316 | -3.108030 | -0.521660 |
| N    | -3.550796 | 3.115674  | -0.448307 |
| N    | 3.552687  | -3.109584 | -0.522467 |
| C    | 5.011907  | 2.891777  | -0.454546 |
| C    | -5.010891 | -2.880449 | -0.534061 |
| C    | 2.854758  | 3.212775  | 0.736224  |
| C    | -2.837369 | -3.110303 | -1.689022 |
| C    | 1.495892  | 3.321698  | 0.770776  |
| C    | -1.479812 | -3.220288 | -1.712469 |
| C    | 0.711873  | 3.328091  | -0.426890 |
| C    | -0.710163 | -3.315134 | -0.509418 |
| C    | 1.485143  | 3.283959  | -1.630612 |
| C    | -1.497342 | -3.350975 | 0.685705  |
| C    | 2.842606  | 3.172126  | -1.607783 |
| C    | -2.856284 | -3.240999 | 0.651518  |
| C    | -0.715934 | 3.325185  | -0.429388 |
| C    | 0.717703  | -3.317452 | -0.509189 |

|   |           |           |           |
|---|-----------|-----------|-----------|
| C | -1.504261 | 3.336283  | 0.765473  |
| C | 1.488318  | -3.241116 | -1.713034 |
| C | -2.862991 | 3.225809  | 0.727931  |
| C | 2.845729  | -3.129446 | -1.690415 |
| C | -2.841871 | 3.142838  | -1.614788 |
| C | 2.863112  | -3.231026 | 0.651741  |
| C | -1.484372 | 3.255033  | -1.634858 |
| C | 1.504311  | -3.341599 | 0.686542  |
| C | -5.016124 | 2.886628  | -0.466168 |
| C | 5.017232  | -2.876685 | -0.535369 |
| C | -5.340606 | 1.407180  | -0.516788 |
| C | 5.338659  | -1.395687 | -0.549648 |
| C | -5.588199 | 0.685551  | 0.653768  |
| C | 5.251744  | -0.669814 | -1.739596 |
| C | -5.586753 | -0.707773 | 0.636931  |
| C | 5.250447  | 0.720514  | -1.719679 |
| C | -5.337679 | -1.400703 | -0.550454 |
| C | 5.335866  | 1.412313  | -0.509514 |
| C | -5.259252 | -0.677509 | -1.742584 |
| C | 5.589524  | 0.688440  | 0.658335  |
| C | -5.260777 | 0.712896  | -1.725881 |
| C | 5.590997  | -0.704904 | 0.638267  |
| H | 5.424082  | 3.357673  | 0.442232  |
| H | -5.407921 | -3.387866 | -1.415715 |
| H | 5.411780  | 3.421365  | -1.321720 |
| H | -5.423586 | -3.370297 | 0.349556  |
| H | 3.447986  | 3.184330  | 1.641605  |
| H | -3.415482 | -3.017299 | -2.599030 |
| H | 1.036086  | 3.380147  | 1.748835  |
| H | -1.011285 | -3.211878 | -2.687866 |
| H | 1.020008  | 3.329833  | -2.606523 |
| H | -1.040131 | -3.448147 | 1.661954  |

|   |           |           |           |
|---|-----------|-----------|-----------|
| H | 3.424029  | 3.119357  | -2.518969 |
| H | -3.451953 | -3.245765 | 1.555756  |
| H | -1.048097 | 3.416114  | 1.743740  |
| H | 1.020754  | -3.258707 | -2.688708 |
| H | -3.459532 | 3.212830  | 1.631485  |
| H | 3.425013  | -3.052643 | -2.601278 |
| H | -3.419125 | 3.067080  | -2.526924 |
| H | 3.458331  | -3.225017 | 1.556269  |
| H | -1.015014 | 3.266594  | -2.609846 |
| H | 1.046597  | -3.425870 | 1.663730  |
| H | -5.413708 | 3.413430  | -1.336075 |
| H | 5.432549  | -3.366186 | 0.347261  |
| H | -5.429528 | 3.355935  | 0.428221  |
| H | 5.415634  | -3.381314 | -1.418010 |
| H | -5.717787 | 1.207387  | 1.597893  |
| H | 5.110401  | -1.184222 | -2.684918 |
| H | -5.715198 | -1.252400 | 1.568300  |
| H | 5.108384  | 1.261013  | -2.650373 |
| H | -5.122791 | -1.193917 | -2.687595 |
| H | 5.722393  | 1.208220  | 1.603134  |
| H | -5.125646 | 1.251799  | -2.658574 |
| H | 5.724941  | -1.251276 | 1.567836  |
| C | 1.222133  | -0.031960 | 2.304792  |
| C | -0.003525 | -0.020872 | 1.606793  |
| C | 2.407033  | -0.023933 | 1.610129  |
| C | 1.226496  | -0.053250 | 3.788087  |
| C | -0.000804 | -0.000159 | 0.197798  |
| C | -1.231226 | -0.031118 | 2.301188  |
| C | 1.223048  | 0.009331  | -0.494764 |
| C | -1.221239 | 0.009121  | -0.501004 |
| C | 2.401575  | -0.003529 | 0.203961  |
| C | 1.237631  | 0.033395  | -1.976903 |

|   |           |           |           |
|---|-----------|-----------|-----------|
| C | -1.249820 | -0.053012 | 3.786133  |
| C | -2.412774 | -0.021903 | 1.600466  |
| C | -1.238283 | 0.031179  | -1.985077 |
| C | -2.401972 | -0.002087 | 0.194474  |
| C | 0.041052  | 0.083319  | -4.083257 |
| C | 0.020186  | -0.082838 | 5.891791  |
| H | -3.351266 | -0.030501 | 2.140979  |
| H | -3.319655 | 0.004584  | -0.367019 |
| H | 0.618004  | 0.947205  | -4.417012 |
| H | 3.343160  | -0.033524 | 2.154961  |
| H | 3.321000  | 0.002683  | -0.354431 |
| H | -1.005990 | -0.092393 | 6.249311  |
| H | 0.538399  | 0.803271  | 6.262520  |
| H | 0.546387  | -0.974352 | 6.237257  |
| H | -0.981131 | 0.150617  | -4.445350 |
| H | 0.513610  | -0.826271 | -4.459329 |
| N | 0.002945  | 0.055617  | -2.622421 |
| N | -0.010812 | -0.062418 | 4.429977  |
| O | -2.274170 | 0.031179  | -2.625170 |
| O | -2.292555 | -0.062229 | 4.415900  |
| O | 2.265892  | 0.036332  | -2.629620 |
| O | 2.256820  | -0.062427 | 4.438496  |

---

NDI-CBPQT<sup>++</sup>

| Atom | X         | Y         | Z         |
|------|-----------|-----------|-----------|
| N    | -4.531979 | 2.720516  | -0.095134 |
| N    | 4.418842  | -2.450236 | -1.050093 |
| N    | 2.574629  | 3.380184  | 0.122045  |
| N    | -2.616754 | -3.301528 | -0.975421 |
| C    | -5.838649 | 2.063862  | -0.231622 |
| C    | 5.772381  | -1.848613 | -0.980320 |



|   |           |           |           |
|---|-----------|-----------|-----------|
| C | -3.813908 | 3.090738  | -1.219726 |
| C | 3.801710  | -2.940709 | 0.067223  |
| C | -2.487590 | 3.342448  | -1.189732 |
| C | 2.474612  | -3.252656 | 0.081634  |
| C | -1.693376 | 3.168678  | 0.015448  |
| C | 1.643764  | -3.045054 | -1.065414 |
| C | -2.504198 | 2.868072  | 1.178675  |
| C | 2.359141  | -2.651169 | -2.239161 |
| C | -3.834321 | 2.627930  | 1.090088  |
| C | 3.685072  | -2.347732 | -2.197944 |
| C | -0.302739 | 3.248377  | 0.052093  |
| C | 0.220270  | -3.149891 | -1.033489 |
| C | 0.523307  | 3.461737  | -1.118125 |
| C | -0.521808 | -3.378559 | 0.168821  |
| C | 1.877095  | 3.516120  | -1.055352 |
| C | -1.884273 | -3.438708 | 0.169194  |
| C | 1.838733  | 3.158135  | 1.265300  |
| C | -1.951888 | -3.056801 | -2.141938 |
| C | 0.486470  | 3.085935  | 1.262164  |
| C | -0.592721 | -2.976025 | -2.198030 |
| C | 4.039479  | 3.534008  | 0.155586  |
| C | -4.094808 | -3.410332 | -0.959965 |
| C | 4.787942  | 2.250639  | -0.153607 |
| C | -4.783146 | -2.070758 | -0.806941 |
| C | 4.917235  | 1.810653  | -1.472131 |
| C | -5.254122 | -1.638875 | 0.435235  |
| C | 5.352041  | 0.519520  | -1.747926 |
| C | -5.699205 | -0.329809 | 0.605713  |
| C | 5.669255  | -0.359776 | -0.709661 |
| C | -5.677609 | 0.572384  | -0.461658 |
| C | 5.704255  | 0.136136  | 0.596263  |
| C | -5.331131 | 0.097190  | -1.728030 |

|   |           |           |           |
|---|-----------|-----------|-----------|
| C | 5.268584  | 1.430833  | 0.869986  |
| C | -4.891030 | -1.208932 | -1.899588 |
| H | -6.362285 | 2.538629  | -1.065837 |
| H | 6.321261  | -2.366375 | -0.191504 |
| H | -6.411360 | 2.261209  | 0.678800  |
| H | 6.269115  | -2.054432 | -1.931066 |
| H | -4.394253 | 3.188077  | -2.129977 |
| H | 4.425030  | -3.047400 | 0.946422  |
| H | -2.025902 | 3.656467  | -2.118455 |
| H | 2.069448  | -3.630294 | 1.011742  |
| H | -2.056804 | 2.778307  | 2.161063  |
| H | 1.861605  | -2.517747 | -3.190544 |
| H | -4.424385 | 2.357245  | 1.958833  |
| H | 4.214533  | -1.990619 | -3.071356 |
| H | 0.076997  | 3.574888  | -2.099055 |
| H | -0.027776 | -3.481864 | 1.126403  |
| H | 2.478554  | 3.668254  | -1.943161 |
| H | -2.448558 | -3.599534 | 1.079091  |
| H | 2.414270  | 3.030362  | 2.174559  |
| H | -2.565117 | -2.941509 | -3.026123 |
| H | 0.009644  | 2.892345  | 2.215091  |
| H | -0.156651 | -2.787564 | -3.170189 |
| H | 4.305709  | 3.905416  | 1.148009  |
| H | -4.384133 | -3.897738 | -1.893855 |
| H | 4.301320  | 4.314097  | -0.564738 |
| H | -4.357520 | -4.084274 | -0.142573 |
| H | 4.604898  | 2.450004  | -2.292044 |
| H | -5.223117 | -2.309522 | 1.289925  |
| H | 5.367156  | 0.175240  | -2.777680 |
| H | -6.005996 | 0.006307  | 1.592945  |
| H | 6.002135  | -0.513496 | 1.415215  |
| H | -5.335261 | 0.771563  | -2.578716 |

|   |           |           |           |
|---|-----------|-----------|-----------|
| H | 5.231070  | 1.774105  | 1.900466  |
| H | -4.572651 | -1.533975 | -2.885392 |
| C | -1.217046 | 0.113599  | -0.411071 |
| C | 0.025852  | 0.003914  | 0.244996  |
| C | -2.388646 | -0.064969 | 0.297652  |
| C | -1.261592 | 0.378004  | -1.854426 |
| C | 0.059425  | -0.268992 | 1.631722  |
| C | 1.228660  | 0.167829  | -0.460247 |
| C | -1.152832 | -0.451646 | 2.336058  |
| C | 1.302725  | -0.361905 | 2.285504  |
| C | -2.359006 | -0.346108 | 1.665733  |
| C | -1.124560 | -0.740413 | 3.773733  |
| C | 1.215293  | 0.433965  | -1.913450 |
| C | 2.435326  | 0.034852  | 0.196890  |
| C | 1.357191  | -0.642194 | 3.734233  |
| C | 2.476792  | -0.222564 | 1.565296  |
| C | 0.135382  | -1.099030 | 5.816669  |
| C | -0.112914 | 0.795802  | -3.943739 |
| H | 3.336926  | 0.111681  | -0.384724 |
| H | 3.425314  | -0.325883 | 2.077906  |
| H | -0.419403 | -0.324403 | 6.349755  |
| H | -3.322542 | 0.045494  | -0.226101 |
| H | -3.284726 | -0.480385 | 2.213695  |
| H | 0.901445  | 0.904800  | -4.318213 |
| H | -0.680741 | 1.711780  | -4.120807 |
| H | -0.614745 | -0.031349 | -4.450954 |
| H | 1.168089  | -1.119123 | 6.154505  |
| H | -0.339560 | -2.064079 | 6.004427  |
| N | 0.133209  | -0.814683 | 4.384366  |
| N | -0.039375 | 0.530076  | -2.512263 |
| O | 2.414000  | -0.724652 | 4.345863  |
| O | 2.237343  | 0.536697  | -2.578623 |

|   |           |           |           |
|---|-----------|-----------|-----------|
| O | -2.132659 | -0.913828 | 4.447573  |
| O | -2.299966 | 0.461800  | -2.496309 |

NDI-CBPQT<sup>0</sup>

| Atom | X         | Y         | Z         |
|------|-----------|-----------|-----------|
| N    | 2.743949  | 3.110902  | 0.808494  |
| N    | -2.417330 | -3.078093 | -1.471319 |
| N    | -3.992928 | 3.144541  | -1.595117 |
| N    | 4.398372  | -3.097228 | 0.701937  |
| C    | 4.126595  | 3.101480  | 1.298728  |
| C    | -3.813711 | -3.075855 | -1.921304 |
| C    | 1.665823  | 3.023710  | 1.668411  |
| C    | -1.373486 | -2.984353 | -2.370765 |
| C    | 0.384230  | 3.091855  | 1.247207  |
| C    | -0.074655 | -3.044014 | -1.999736 |
| C    | 0.022700  | 3.259029  | -0.159743 |
| C    | 0.341438  | -3.215769 | -0.611836 |
| C    | 1.199576  | 3.295556  | -1.021468 |
| C    | -0.803807 | -3.257872 | 0.296609  |
| C    | 2.460390  | 3.225233  | -0.538359 |
| C    | -2.081712 | -3.189320 | -0.135305 |
| C    | -1.276553 | 3.336674  | -0.619095 |
| C    | 1.656795  | -3.292379 | -0.201126 |
| C    | -2.449513 | 3.253652  | 0.246152  |
| C    | 2.806400  | -3.211008 | -1.100135 |
| C    | -3.702726 | 3.127531  | -0.239880 |
| C    | 4.069411  | -3.083930 | -0.648384 |
| C    | -2.916836 | 3.326866  | -2.455801 |
| C    | 3.349581  | -3.277448 | 1.590342  |
| C    | -1.645880 | 3.458489  | -2.027923 |
| C    | 2.065487  | -3.411518 | 1.195357  |

|   |           |           |           |
|---|-----------|-----------|-----------|
| C | -5.236355 | 2.543510  | -2.088838 |
| C | 5.653714  | -2.491952 | 1.158744  |
| C | -5.142876 | 1.029832  | -2.175114 |
| C | 5.550059  | -0.980622 | 1.269280  |
| C | -5.577494 | 0.214846  | -1.125867 |
| C | 5.617163  | -0.192317 | 0.118259  |
| C | -5.216870 | -1.130679 | -1.076502 |
| C | 5.232212  | 1.142241  | 0.146896  |
| C | -4.414871 | -1.689931 | -2.074323 |
| C | 4.766395  | 1.724897  | 1.326827  |
| C | -4.106582 | -0.909740 | -3.190064 |
| C | 4.833249  | 0.977990  | 2.505543  |
| C | -4.463393 | 0.432203  | -3.238743 |
| C | 5.220664  | -0.360813 | 2.477901  |
| H | 4.122703  | 3.538354  | 2.301123  |
| H | -3.850554 | -3.610635 | -2.875513 |
| H | 4.705881  | 3.773672  | 0.658162  |
| H | -4.392277 | -3.662508 | -1.202435 |
| H | 1.915721  | 2.880527  | 2.713746  |
| H | -1.660637 | -2.856339 | -3.407956 |
| H | -0.383469 | 2.988032  | 2.004814  |
| H | 0.662821  | -2.945802 | -2.788343 |
| H | 1.092151  | 3.373459  | -2.097407 |
| H | -0.654973 | -3.321090 | 1.367961  |
| H | 3.321760  | 3.254395  | -1.195667 |
| H | -2.918365 | -3.204656 | 0.554163  |
| H | -2.340941 | 3.255925  | 1.324692  |
| H | 2.668449  | -3.225839 | -2.175407 |
| H | -4.561825 | 3.022909  | 0.414875  |
| H | 4.911718  | -2.990987 | -1.325609 |
| H | -3.174107 | 3.384521  | -3.508059 |
| H | 3.633323  | -3.322616 | 2.636864  |

|   |           |           |           |
|---|-----------|-----------|-----------|
| H | -0.888574 | 3.633368  | -2.783827 |
| H | 1.329423  | -3.577305 | 1.973702  |
| H | -5.444777 | 2.978859  | -3.070960 |
| H | 5.906246  | -2.936150 | 2.126231  |
| H | -6.044112 | 2.844057  | -1.414653 |
| H | 6.435267  | -2.777674 | 0.447992  |
| H | -6.145614 | 0.647400  | -0.305746 |
| H | 5.902905  | -0.643024 | -0.827475 |
| H | -5.510366 | -1.731891 | -0.219362 |
| H | 5.232622  | 1.712804  | -0.777099 |
| H | -3.522177 | -1.331827 | -4.002137 |
| H | 4.519198  | 1.424917  | 3.445588  |
| H | -4.143045 | 1.036800  | -4.082038 |
| H | 5.202305  | -0.942675 | 3.396479  |
| C | 0.410943  | -0.325638 | 2.757344  |
| C | -0.531547 | -0.166687 | 1.718703  |
| C | 1.758010  | -0.396378 | 2.461596  |
| C | -0.051879 | -0.440865 | 4.149929  |
| C | -0.080677 | -0.046833 | 0.388029  |
| C | -1.916649 | -0.123947 | 1.988535  |
| C | 1.297465  | -0.116588 | 0.113274  |
| C | -1.013499 | 0.139825  | -0.649028 |
| C | 2.197387  | -0.300201 | 1.137429  |
| C | 1.779743  | 0.007756  | -1.275661 |
| C | -2.404474 | -0.257444 | 3.372376  |
| C | -2.811996 | 0.068536  | 0.954615  |
| C | -0.557674 | 0.268738  | -2.048617 |
| C | -2.357280 | 0.206333  | -0.360643 |
| C | 1.321663  | 0.348139  | -3.623498 |
| C | -1.866590 | -0.542599 | 5.755730  |
| H | -3.872527 | 0.122722  | 1.171172  |
| H | -3.044580 | 0.395897  | -1.167034 |

|   |           |           |           |
|---|-----------|-----------|-----------|
| H | 2.057678  | 1.153828  | -3.660374 |
| H | 2.473218  | -0.537651 | 3.263735  |
| H | 3.240590  | -0.395318 | 0.890380  |
| H | -2.952948 | -0.571329 | 5.767250  |
| H | -1.509815 | 0.307388  | 6.341937  |
| H | -1.460514 | -1.460059 | 6.185339  |
| H | 0.479897  | 0.575615  | -4.272190 |
| H | 1.801573  | -0.579558 | -3.945751 |
| N | 0.819474  | 0.207823  | -2.263912 |
| N | -1.432048 | -0.412695 | 4.368024  |
| O | -1.325037 | 0.428269  | -2.985223 |
| O | -3.594070 | -0.234274 | 3.659037  |
| O | 2.958507  | -0.057080 | -1.589432 |
| O | 0.707913  | -0.562340 | 5.102014  |

TTF-CBPQT<sup>4+</sup>

| Atom | X         | Y         | Z         |
|------|-----------|-----------|-----------|
| N    | 2.858286  | 3.616121  | 1.400831  |
| N    | -2.875815 | -3.593626 | -1.372853 |
| N    | -3.626561 | 2.944991  | -1.124258 |
| N    | 3.615119  | -2.921729 | 1.139150  |
| C    | 4.247498  | 3.368688  | 1.880848  |
| C    | -4.265494 | -3.346172 | -1.851310 |
| C    | 1.826969  | 3.379146  | 2.230711  |
| C    | -1.845598 | -3.364302 | -2.206201 |
| C    | 0.528482  | 3.394806  | 1.770145  |
| C    | -0.546201 | -3.380456 | -1.748201 |
| C    | 0.267282  | 3.644203  | 0.420570  |
| C    | -0.282383 | -3.621942 | -0.397601 |
| C    | 1.357360  | 3.956272  | -0.402007 |
| C    | -1.371890 | -3.926041 | 0.428956  |

|   |           |           |           |
|---|-----------|-----------|-----------|
| C | 2.635523  | 3.927782  | 0.108564  |
| C | -2.650967 | -3.897764 | -0.079142 |
| C | -1.102461 | 3.499648  | -0.127515 |
| C | 1.088769  | -3.477356 | 0.147123  |
| C | -2.229664 | 3.512953  | 0.703809  |
| C | 2.214017  | -3.485358 | -0.687161 |
| C | -3.471935 | 3.226617  | 0.184650  |
| C | 3.457193  | -3.198807 | -0.170369 |
| C | -2.572508 | 2.984522  | -1.958785 |
| C | 2.563368  | -2.966214 | 1.976275  |
| C | -1.307828 | 3.265381  | -1.489420 |
| C | 1.297969  | -3.247774 | 1.509315  |
| C | -4.929988 | 2.427539  | -1.628467 |
| C | 4.918893  | -2.403633 | 1.641633  |
| C | -4.866552 | 0.919120  | -1.710016 |
| C | 4.853632  | -0.895490 | 1.727268  |
| C | -4.921343 | 0.156546  | -0.540690 |
| C | 4.905841  | -0.129752 | 0.559882  |
| C | -4.763604 | -1.220727 | -0.594149 |
| C | 4.746322  | 1.247168  | 0.617143  |
| C | -4.547109 | -1.860286 | -1.817365 |
| C | 4.530870  | 1.883233  | 1.842364  |
| C | -4.526318 | -1.104482 | -2.987891 |
| C | 4.512736  | 1.124333  | 3.010941  |
| C | -4.685083 | 0.279590  | -2.934287 |
| C | 4.673141  | -0.259398 | 2.953472  |
| H | 4.323756  | 3.775958  | 2.889375  |
| H | -4.343963 | -3.756851 | -2.858268 |
| H | 4.916965  | 3.934668  | 1.232304  |
| H | -4.934567 | -3.909118 | -1.199693 |
| H | 2.069098  | 3.147754  | 3.259654  |
| H | -2.089084 | -3.138757 | -3.236120 |



|   |           |           |           |
|---|-----------|-----------|-----------|
| H | -0.251156 | 3.141669  | 2.476861  |
| H | 0.232296  | -3.135103 | -2.458769 |
| H | 1.238922  | 4.221311  | -1.444222 |
| H | -1.252715 | -4.184912 | 1.472604  |
| H | 3.503537  | 4.145925  | -0.498865 |
| H | -3.518152 | -4.110153 | 0.531446  |
| H | -2.167653 | 3.739909  | 1.759637  |
| H | 2.150137  | -3.708084 | -1.743725 |
| H | -4.362598 | 3.207186  | 0.798113  |
| H | 4.346090  | -3.175632 | -0.786263 |
| H | -2.762793 | 2.755534  | -2.999250 |
| H | 2.755812  | -2.740333 | 3.017014  |
| H | -0.494177 | 3.231765  | -2.202263 |
| H | 0.486701  | -3.218374 | 2.224922  |
| H | -5.111607 | 2.885954  | -2.600783 |
| H | 5.103292  | -2.864227 | 2.612403  |
| H | -5.700711 | 2.771929  | -0.938412 |
| H | 5.688522  | -2.745115 | 0.948911  |
| H | -5.083130 | 0.634294  | 0.421235  |
| H | 5.066951  | -0.604889 | -0.403440 |
| H | -4.807390 | -1.792797 | 0.327983  |
| H | 4.787752  | 1.821689  | -0.303573 |
| H | -4.380335 | -1.587124 | -3.949544 |
| H | 4.367492  | 1.604323  | 3.974030  |
| H | -4.658399 | 0.855477  | -3.854723 |
| H | 4.648493  | -0.837750 | 3.872407  |
| C | -0.084235 | -0.013145 | 0.678997  |
| C | 0.291475  | 0.012913  | 3.245395  |
| C | -1.025881 | -0.127396 | 3.091561  |
| H | 0.802439  | 0.069935  | 4.198406  |
| H | -1.737607 | -0.201257 | 3.904289  |
| C | 0.073389  | 0.028455  | -0.663689 |

|   |           |           |           |
|---|-----------|-----------|-----------|
| C | 1.013137  | 0.163815  | -3.075975 |
| C | -0.304069 | 0.022369  | -3.230052 |
| H | 1.723890  | 0.248205  | -3.888533 |
| H | -0.815997 | -0.024676 | -4.183083 |
| S | -1.662953 | -0.201660 | 1.458535  |
| S | 1.275980  | 0.112092  | 1.797684  |
| S | -1.286650 | -0.096840 | -1.782512 |
| S | 1.652019  | 0.218567  | -1.442920 |

TTF-CBPQT<sup>3+</sup>

| Atom | X         | Y         | Z         |
|------|-----------|-----------|-----------|
| N    | 2.852178  | 3.617337  | 1.490154  |
| N    | -2.882912 | -3.497499 | -1.333570 |
| N    | -3.818561 | 2.951464  | -0.674217 |
| N    | 3.532791  | -2.899124 | 1.341827  |
| C    | 4.230382  | 3.367470  | 1.944532  |
| C    | -4.277980 | -3.278353 | -1.814840 |
| C    | 1.831888  | 3.732973  | 2.389095  |
| C    | -1.855761 | -3.106226 | -2.109985 |
| C    | 0.528930  | 3.743715  | 1.995990  |
| C    | -0.562576 | -3.132592 | -1.637878 |
| C    | 0.166760  | 3.605416  | 0.620092  |
| C    | -0.308769 | -3.550233 | -0.329934 |
| C    | 1.269257  | 3.542721  | -0.287088 |
| C    | -1.389385 | -4.002936 | 0.433197  |
| C    | 2.552866  | 3.534564  | 0.160507  |
| C    | -2.663362 | -3.959889 | -0.088708 |
| C    | -1.181040 | 3.473363  | 0.185651  |
| C    | 1.046536  | -3.419045 | 0.253132  |
| C    | -2.280384 | 3.374731  | 1.093506  |
| C    | 2.189059  | -3.376349 | -0.550176 |

|   |           |           |           |
|---|-----------|-----------|-----------|
| C | -3.539410 | 3.103446  | 0.652944  |
| C | 3.415620  | -3.105384 | 0.017120  |
| C | -2.809566 | 3.104274  | -1.581528 |
| C | 2.457722  | -2.984765 | 2.146733  |
| C | -1.532816 | 3.367000  | -1.196154 |
| C | 1.208888  | -3.245139 | 1.630539  |
| C | -5.121174 | 2.427808  | -1.118753 |
| C | 4.825572  | -2.412280 | 1.905271  |
| C | -5.037256 | 0.932218  | -1.330107 |
| C | 4.795687  | -0.904101 | 1.966872  |
| C | -5.217215 | 0.054992  | -0.258225 |
| C | 5.144986  | -0.153419 | 0.844306  |
| C | -5.014340 | -1.309078 | -0.424487 |
| C | 5.004544  | 1.229299  | 0.855834  |
| C | -4.627329 | -1.817314 | -1.666734 |
| C | 4.507597  | 1.880796  | 1.985177  |
| C | -4.487722 | -0.948516 | -2.747679 |
| C | 4.195096  | 1.131881  | 3.120214  |
| C | -4.693411 | 0.417308  | -2.579112 |
| C | 4.339547  | -0.251141 | 3.112716  |
| H | 4.344095  | 3.825501  | 2.928669  |
| H | -4.318086 | -3.610831 | -2.852709 |
| H | 4.907627  | 3.878732  | 1.257162  |
| H | -4.925319 | -3.924226 | -1.221530 |
| H | 2.119681  | 3.818068  | 3.429510  |
| H | -2.099459 | -2.744063 | -3.099666 |
| H | -0.218331 | 3.848755  | 2.771568  |
| H | 0.219129  | -2.765049 | -2.290113 |
| H | 1.122944  | 3.458389  | -1.355523 |
| H | -1.265160 | -4.390269 | 1.435966  |
| H | 3.395051  | 3.455877  | -0.515118 |
| H | -3.529422 | -4.281094 | 0.474447  |

|   |           |           |           |
|---|-----------|-----------|-----------|
| H | -2.144329 | 3.474667  | 2.162037  |
| H | 2.150602  | -3.544000 | -1.618786 |
| H | -4.374820 | 2.991588  | 1.332554  |
| H | 4.321619  | -3.039856 | -0.570198 |
| H | -3.084884 | 3.000648  | -2.623470 |
| H | 2.620324  | -2.809254 | 3.201669  |
| H | -0.797476 | 3.481401  | -1.981489 |
| H | 0.370716  | -3.245879 | 2.314970  |
| H | -5.392963 | 2.945141  | -2.041346 |
| H | 4.943991  | -2.869082 | 2.888308  |
| H | -5.859774 | 2.686538  | -0.358252 |
| H | 5.617849  | -2.785005 | 1.256139  |
| H | -5.509004 | 0.437925  | 0.715492  |
| H | 5.527273  | -0.642836 | -0.046979 |
| H | -5.151179 | -1.976281 | 0.421730  |
| H | 5.281772  | 1.799919  | -0.026038 |
| H | -4.219392 | -1.332218 | -3.728144 |
| H | 3.830488  | 1.625230  | 4.016447  |
| H | -4.580295 | 1.082101  | -3.430716 |
| H | 4.091873  | -0.817952 | 4.005860  |
| C | 0.074905  | 0.084441  | -0.235888 |
| C | -0.262890 | -0.122321 | 2.324225  |
| C | -1.485372 | -0.245537 | 1.805318  |
| H | -0.032558 | -0.182326 | 3.380696  |
| H | -2.387021 | -0.415626 | 2.380587  |
| C | 0.596496  | 0.138353  | -1.477098 |
| C | 2.163153  | -0.223620 | -3.502058 |
| C | 0.932339  | -0.247702 | -4.015029 |
| H | 3.069385  | -0.405379 | -4.066391 |
| H | 0.700636  | -0.451091 | -5.053004 |
| S | -1.662823 | -0.093652 | 0.066500  |
| S | 1.070742  | 0.186111  | 1.223982  |

| S                              | -0.407071 | 0.135470  | -2.940317 |
|--------------------------------|-----------|-----------|-----------|
| S                              | 2.340214  | 0.180925  | -1.799863 |
| TTF-CBPQT <sup>2(++)</sup> (T) |           |           |           |
| Atom                           | X         | Y         | Z         |
| N                              | 2.881684  | 3.600466  | 1.475485  |
| N                              | -2.889864 | -3.504554 | -1.473475 |
| N                              | -3.653871 | 2.964099  | -1.150350 |
| N                              | 3.645408  | -2.868378 | 1.153032  |
| C                              | 4.249473  | 3.381475  | 1.981700  |
| C                              | -4.257635 | -3.285563 | -1.979738 |
| C                              | 1.805963  | 3.512846  | 2.311265  |
| C                              | -1.814075 | -3.416853 | -2.309168 |
| C                              | 0.528254  | 3.503558  | 1.840960  |
| C                              | -0.536394 | -3.407748 | -1.838777 |
| C                              | 0.247043  | 3.552604  | 0.439098  |
| C                              | -0.255280 | -3.457036 | -0.436894 |
| C                              | 1.402597  | 3.693026  | -0.391912 |
| C                              | -1.410906 | -3.597523 | 0.394011  |
| C                              | 2.658087  | 3.702005  | 0.132156  |
| C                              | -2.666360 | -3.606333 | -0.130149 |
| C                              | -1.067560 | 3.424085  | -0.092305 |
| C                              | 1.059267  | -3.328597 | 0.094648  |
| C                              | -2.208329 | 3.176094  | 0.733596  |
| C                              | 2.200080  | -3.080273 | -0.731098 |
| C                              | -3.437498 | 2.947642  | 0.197976  |
| C                              | 3.429159  | -2.851710 | -0.195315 |
| C                              | -2.602951 | 3.242791  | -1.976054 |
| C                              | 2.594471  | -3.147436 | 1.978578  |
| C                              | -1.352542 | 3.483337  | -1.493010 |
| C                              | 1.344150  | -3.388139 | 1.495370  |
| C                              | -4.937870 | 2.483314  | -1.694802 |

|   |           |           |           |
|---|-----------|-----------|-----------|
| C | 4.929308  | -2.387519 | 1.697666  |
| C | -4.937325 | 0.974402  | -1.822908 |
| C | 4.928776  | -0.878587 | 1.825577  |
| C | -5.191852 | 0.173423  | -0.707635 |
| C | 5.183569  | -0.077798 | 0.710236  |
| C | -5.028102 | -1.204890 | -0.775228 |
| C | 5.019915  | 1.300552  | 0.777568  |
| C | -4.608894 | -1.812748 | -1.960270 |
| C | 4.600585  | 1.908619  | 1.962436  |
| C | -4.427773 | -1.021679 | -3.094861 |
| C | 4.419192  | 1.117722  | 3.097131  |
| C | -4.589438 | 0.360958  | -3.026227 |
| C | 4.580706  | -0.264934 | 3.028747  |
| H | 4.299371  | 3.791270  | 2.992350  |
| H | -4.307438 | -3.695224 | -2.990448 |
| H | 4.927159  | 3.962330  | 1.352302  |
| H | -4.935319 | -3.866566 | -1.350472 |
| H | 2.029185  | 3.438969  | 3.368460  |
| H | -2.037233 | -3.342868 | -3.366369 |
| H | -0.261972 | 3.430022  | 2.576481  |
| H | 0.253905  | -3.334289 | -2.574231 |
| H | 1.319085  | 3.775206  | -1.467261 |
| H | -1.327472 | -3.680111 | 1.469332  |
| H | 3.539163  | 3.787821  | -0.491237 |
| H | -3.547476 | -3.692281 | 0.493168  |
| H | -2.128824 | 3.136296  | 1.811558  |
| H | 2.120675  | -3.040287 | -1.809057 |
| H | -4.301260 | 2.738710  | 0.816391  |
| H | 4.292940  | -2.642536 | -0.813620 |
| H | -2.820228 | 3.251557  | -3.037089 |
| H | 2.811677  | -3.156436 | 3.039624  |
| H | -0.580298 | 3.695982  | -2.220613 |

|   |           |           |           |
|---|-----------|-----------|-----------|
| H | 0.571913  | -3.601270 | 2.222840  |
| H | -5.089289 | 2.965638  | -2.662209 |
| H | 5.080549  | -2.869734 | 2.665154  |
| H | -5.727640 | 2.826599  | -1.022740 |
| H | 5.719199  | -2.730878 | 1.025786  |
| H | -5.503940 | 0.627176  | 0.228772  |
| H | 5.495835  | -0.531703 | -0.226037 |
| H | -5.213068 | -1.805969 | 0.110717  |
| H | 5.205073  | 1.901469  | -0.108448 |
| H | -4.134644 | -1.480619 | -4.035284 |
| H | 4.126046  | 1.576869  | 4.037452  |
| H | -4.419916 | 0.963612  | -3.914596 |
| H | 4.410899  | -0.867447 | 3.917155  |
| C | 0.067664  | 0.018702  | 0.668942  |
| C | 1.009227  | -0.002603 | 3.081827  |
| C | -0.306145 | -0.158710 | 3.232323  |
| H | 1.720281  | 0.034214  | 3.897347  |
| H | -0.810335 | -0.266049 | 4.184582  |
| C | -0.076217 | 0.076279  | -0.666443 |
| C | 0.296843  | 0.259594  | -3.229516 |
| C | -1.018559 | 0.103795  | -3.078974 |
| H | 0.800698  | 0.369731  | -4.181635 |
| H | -1.729960 | 0.069872  | -3.894316 |
| S | -1.296622 | -0.196063 | 1.783239  |
| S | 1.640509  | 0.151091  | 1.455947  |
| S | -1.649133 | -0.055760 | -1.453367 |
| S | 1.288113  | 0.290375  | -1.780818 |

---

TTF-CBPQT<sup>2(++)</sup>(S)

---

| Atom | X         | Y         | Z         |
|------|-----------|-----------|-----------|
| N    | 2.822133  | 3.655162  | 1.504074  |
| N    | -3.009665 | -3.563422 | -1.159982 |

|   |           |           |           |
|---|-----------|-----------|-----------|
| N | -3.786230 | 2.969960  | -0.837680 |
| N | 3.606598  | -2.874857 | 1.171588  |
| C | 4.188199  | 3.405188  | 1.995291  |
| C | -4.402165 | -3.321624 | -1.573257 |
| C | 1.774887  | 3.758606  | 2.372038  |
| C | -1.990196 | -3.323118 | -2.035580 |
| C | 0.484391  | 3.772986  | 1.939445  |
| C | -0.690484 | -3.309844 | -1.636501 |
| C | 0.163881  | 3.644468  | 0.552252  |
| C | -0.331507 | -3.517746 | -0.268780 |
| C | 1.294421  | 3.594759  | -0.321299 |
| C | -1.426676 | -3.819647 | 0.599275  |
| C | 2.563676  | 3.586124  | 0.165257  |
| C | -2.709194 | -3.818684 | 0.146596  |
| C | -1.169908 | 3.505564  | 0.078904  |
| C | 1.002714  | -3.376630 | 0.202115  |
| C | -2.302710 | 3.488766  | 0.950619  |
| C | 2.084538  | -3.006219 | -0.655025 |
| C | -3.551039 | 3.213146  | 0.483798  |
| C | 3.325431  | -2.756860 | -0.158999 |
| C | -2.741446 | 3.029737  | -1.714583 |
| C | 2.614993  | -3.271842 | 2.020992  |
| C | -1.474685 | 3.302074  | -1.302910 |
| C | 1.356069  | -3.535623 | 1.578329  |
| C | -5.086928 | 2.446320  | -1.288769 |
| C | 4.882911  | -2.361745 | 1.698032  |
| C | -5.039557 | 0.938527  | -1.389574 |
| C | 4.825206  | -0.856928 | 1.836432  |
| C | -5.196169 | 0.150841  | -0.246488 |
| C | 5.271392  | -0.037519 | 0.801038  |
| C | -5.033685 | -1.226827 | -0.314577 |
| C | 5.104222  | 1.342230  | 0.872208  |



|   |           |           |           |
|---|-----------|-----------|-----------|
| C | -4.712325 | -1.842251 | -1.526948 |
| C | 4.488750  | 1.923284  | 1.979707  |
| C | -4.593819 | -1.060451 | -2.674342 |
| C | 4.075993  | 1.105910  | 3.034379  |
| C | -4.756335 | 0.320656  | -2.606055 |
| C | 4.243170  | -0.271668 | 2.963365  |
| H | 4.258356  | 3.821928  | 3.001600  |
| H | -4.527575 | -3.724154 | -2.580721 |
| H | 4.879680  | 3.958497  | 1.355932  |
| H | -5.048660 | -3.891394 | -0.902813 |
| H | 2.030512  | 3.828085  | 3.422095  |
| H | -2.277933 | -3.132496 | -3.061895 |
| H | -0.285169 | 3.860233  | 2.694995  |
| H | 0.052301  | -3.100128 | -2.394699 |
| H | 1.181751  | 3.530686  | -1.395211 |
| H | -1.276514 | -4.030668 | 1.649441  |
| H | 3.427101  | 3.517562  | -0.484610 |
| H | -3.550268 | -4.018961 | 0.798380  |
| H | -2.204321 | 3.670851  | 2.012493  |
| H | 1.946484  | -2.872447 | -1.719594 |
| H | -4.414175 | 3.172883  | 1.136500  |
| H | 4.144311  | -2.441189 | -0.792986 |
| H | -2.978990 | 2.841466  | -2.754057 |
| H | 2.889285  | -3.365300 | 3.064275  |
| H | -0.707798 | 3.327684  | -2.065381 |
| H | 0.631416  | -3.847394 | 2.318382  |
| H | -5.315092 | 2.903520  | -2.253984 |
| H | 5.062059  | -2.848758 | 2.658484  |
| H | -5.840789 | 2.778708  | -0.572824 |
| H | 5.675646  | -2.669118 | 1.012469  |
| H | -5.434835 | 0.617051  | 0.705554  |
| H | 5.748065  | -0.473887 | -0.072406 |

|   |           |           |           |
|---|-----------|-----------|-----------|
| H | -5.148949 | -1.824421 | 0.585673  |
| H | 5.454777  | 1.966118  | 0.054532  |
| H | -4.368791 | -1.526150 | -3.629793 |
| H | 3.612554  | 1.545318  | 3.913462  |
| H | -4.657475 | 0.915699  | -3.509939 |
| H | 3.910217  | -0.894613 | 3.789170  |
| C | 0.113292  | 0.119461  | -0.400167 |
| C | -0.017388 | -0.396694 | 2.131205  |
| C | -1.267808 | -0.531905 | 1.687443  |
| H | 0.303755  | -0.596293 | 3.145926  |
| H | -2.106191 | -0.857603 | 2.290513  |
| C | 0.549690  | 0.240649  | -1.667452 |
| C | 2.037468  | -0.043933 | -3.763160 |
| C | 0.787883  | -0.181893 | -4.207884 |
| H | 2.925852  | -0.183538 | -4.366479 |
| H | 0.521318  | -0.447549 | -5.223378 |
| S | -1.591774 | -0.125093 | 0.010581  |
| S | 1.196822  | 0.175304  | 0.999661  |
| S | -0.522449 | 0.153259  | -3.080486 |
| S | 2.259607  | 0.461026  | -2.091344 |

TTF-CBPQT<sup>•+</sup>

| Atom | X         | Y         | Z         |
|------|-----------|-----------|-----------|
| N    | 3.004459  | 3.623769  | 1.205910  |
| N    | -2.904206 | -3.777514 | -1.560555 |
| N    | -3.585984 | 2.898365  | -1.159113 |
| N    | 3.791292  | -3.012454 | 0.802543  |
| C    | 4.394737  | 3.349597  | 1.608689  |
| C    | -4.236876 | -3.423462 | -2.039096 |
| C    | 1.983210  | 3.379697  | 2.078367  |
| C    | -1.825149 | -3.772914 | -2.435679 |
| C    | 0.683262  | 3.380564  | 1.679773  |

|   |           |           |           |
|---|-----------|-----------|-----------|
| C | -0.546470 | -3.692914 | -2.021259 |
| C | 0.326155  | 3.606980  | 0.314383  |
| C | -0.187151 | -3.541111 | -0.610376 |
| C | 1.422586  | 3.921734  | -0.547593 |
| C | -1.359232 | -3.531112 | 0.264815  |
| C | 2.705041  | 3.903829  | -0.095644 |
| C | -2.614929 | -3.623916 | -0.209828 |
| C | -1.004625 | 3.459296  | -0.163798 |
| C | 1.098289  | -3.397863 | -0.155957 |
| C | -2.084565 | 3.059822  | 0.682080  |
| C | 2.277293  | -3.382770 | -1.023590 |
| C | -3.313681 | 2.779911  | 0.172889  |
| C | 3.519737  | -3.173162 | -0.547571 |
| C | -2.600056 | 3.332983  | -1.995914 |
| C | 2.707498  | -3.023606 | 1.668962  |
| C | -1.352454 | 3.627112  | -1.540371 |
| C | 1.442314  | -3.222348 | 1.254794  |
| C | -4.848958 | 2.365949  | -1.699611 |
| C | 5.053705  | -2.429860 | 1.241973  |
| C | -4.783091 | 0.861785  | -1.839452 |
| C | 4.992158  | -0.919938 | 1.354845  |
| C | -5.250719 | 0.038537  | -0.816383 |
| C | 5.171383  | -0.110322 | 0.229994  |
| C | -5.104089 | -1.342990 | -0.900358 |
| C | 5.018385  | 1.268349  | 0.318233  |
| C | -4.489333 | -1.929173 | -2.006614 |
| C | 4.683870  | 1.867395  | 1.535494  |
| C | -4.045778 | -1.103603 | -3.043224 |
| C | 4.534230  | 1.064806  | 2.664905  |
| C | -4.190664 | 0.276553  | -2.961272 |
| C | 4.687671  | -0.315831 | 2.573913  |
| H | 4.529567  | 3.732096  | 2.622886  |

|   |           |           |           |
|---|-----------|-----------|-----------|
| H | -4.340926 | -3.813399 | -3.055654 |
| H | 5.046698  | 3.922575  | 0.946066  |
| H | -4.971025 | -3.941919 | -1.413703 |
| H | 2.270190  | 3.170580  | 3.101275  |
| H | -2.083326 | -3.874371 | -3.484811 |
| H | -0.060862 | 3.160457  | 2.434024  |
| H | 0.222198  | -3.741563 | -2.784177 |
| H | 1.273451  | 4.149307  | -1.594439 |
| H | -1.245084 | -3.441590 | 1.338525  |
| H | 3.547678  | 4.106667  | -0.744743 |
| H | -3.477885 | -3.606734 | 0.447665  |
| H | -1.950632 | 2.918629  | 1.746435  |
| H | 2.178039  | -3.538099 | -2.091794 |
| H | -4.128866 | 2.436100  | 0.796842  |
| H | 4.388141  | -3.152176 | -1.197974 |
| H | -2.868867 | 3.428548  | -3.040442 |
| H | 2.951290  | -2.883012 | 2.716667  |
| H | -0.630373 | 3.965082  | -2.271466 |
| H | 0.673828  | -3.241764 | 2.018186  |
| H | -5.021982 | 2.851800  | -2.661957 |
| H | 5.312705  | -2.869319 | 2.210764  |
| H | -5.652914 | 2.666395  | -1.023704 |
| H | 5.825362  | -2.732864 | 0.528688  |
| H | -5.732087 | 0.474255  | 0.055322  |
| H | 5.424417  | -0.562770 | -0.725310 |
| H | -5.473621 | -1.969999 | -0.092976 |
| H | 5.155122  | 1.881106  | -0.569203 |
| H | -3.578757 | -1.543339 | -3.920639 |
| H | 4.295393  | 1.515686  | 3.624580  |
| H | -3.837071 | 0.902705  | -3.776524 |
| H | 4.567738  | -0.926352 | 3.465252  |
| C | -0.561724 | -0.186363 | 1.667449  |

|   |           |           |           |
|---|-----------|-----------|-----------|
| C | -0.888487 | 0.454898  | 4.138052  |
| C | -2.122538 | 0.324502  | 3.647088  |
| H | -0.655450 | 0.826199  | 5.128527  |
| H | -3.029326 | 0.574573  | 4.184168  |
| C | -0.077974 | -0.037049 | 0.420441  |
| C | 1.386372  | 0.675940  | -1.585370 |
| C | 0.154290  | 0.560103  | -2.083955 |
| H | 2.250695  | 1.015349  | -2.142723 |
| H | -0.124911 | 0.790128  | -3.104672 |
| S | -2.285428 | -0.386735 | 2.040320  |
| S | 0.448706  | -0.095134 | 3.125658  |
| S | -1.102702 | -0.045530 | -1.019843 |
| S | 1.639512  | 0.210001  | 0.085929  |

TTF-CBPQT<sup>0</sup>

| Atom | X         | Y         | Z         |
|------|-----------|-----------|-----------|
| N    | 3.018773  | 3.771022  | 1.238623  |
| N    | -2.885515 | -3.746088 | -1.650787 |
| N    | -3.577147 | 3.107514  | -1.381299 |
| N    | 3.734108  | -3.053606 | 0.936297  |
| C    | 4.354659  | 3.378531  | 1.673355  |
| C    | -4.193582 | -3.333883 | -2.150297 |
| C    | 1.930532  | 3.498758  | 2.056397  |
| C    | -1.778154 | -3.662201 | -2.486614 |
| C    | 0.663412  | 3.475491  | 1.604058  |
| C    | -0.515526 | -3.603292 | -2.025773 |
| C    | 0.331401  | 3.677388  | 0.194029  |
| C    | -0.201371 | -3.570732 | -0.596700 |
| C    | 1.509983  | 3.985796  | -0.618065 |
| C    | -1.399887 | -3.667768 | 0.238653  |
| C    | 2.755394  | 3.991172  | -0.105536 |
| C    | -2.639674 | -3.720653 | -0.282961 |

|   |           |           |           |
|---|-----------|-----------|-----------|
| C | -0.937488 | 3.554066  | -0.309433 |
| C | 1.069472  | -3.442673 | -0.100125 |
| C | -2.099647 | 3.208218  | 0.508426  |
| C | 2.261563  | -3.324897 | -0.940743 |
| C | -3.313957 | 2.979866  | -0.025197 |
| C | 3.488148  | -3.117277 | -0.427481 |
| C | -2.514619 | 3.463880  | -2.198290 |
| C | 2.638947  | -3.178453 | 1.779029  |
| C | -1.278409 | 3.711009  | -1.724217 |
| C | 1.388377  | -3.389911 | 1.327031  |
| C | -4.768952 | 2.481980  | -1.942120 |
| C | 4.958512  | -2.429787 | 1.424603  |
| C | -4.670533 | 0.971504  | -2.028648 |
| C | 4.869217  | -0.918820 | 1.503939  |
| C | -5.148951 | 0.170221  | -0.991729 |
| C | 5.099803  | -0.129078 | 0.373764  |
| C | -5.012951 | -1.214584 | -1.041261 |
| C | 4.957785  | 1.253020  | 0.432541  |
| C | -4.397053 | -1.831509 | -2.129801 |
| C | 4.581939  | 1.880882  | 1.622648  |
| C | -3.927887 | -1.029920 | -3.174438 |
| C | 4.365656  | 1.093548  | 2.753405  |
| C | -4.062580 | 0.353499  | -3.124110 |
| C | 4.507784  | -0.290533 | 2.694680  |
| H | 4.499218  | 3.745723  | 2.694880  |
| H | -4.296480 | -3.720357 | -3.169134 |
| H | 5.075807  | 3.898697  | 1.035821  |
| H | -4.956535 | -3.825291 | -1.538012 |
| H | 2.169333  | 3.329252  | 3.101174  |
| H | -2.001676 | -3.679430 | -3.548459 |
| H | -0.114469 | 3.283316  | 2.333375  |
| H | 0.276644  | -3.578984 | -2.764861 |

|   |           |           |           |
|---|-----------|-----------|-----------|
| H | 1.408649  | 4.211171  | -1.673784 |
| H | -1.318330 | -3.687537 | 1.319765  |
| H | 3.627483  | 4.204317  | -0.715436 |
| H | -3.524595 | -3.772286 | 0.343287  |
| H | -2.008092 | 3.108225  | 1.583249  |
| H | 2.183694  | -3.395058 | -2.019251 |
| H | -4.166653 | 2.704920  | 0.586985  |
| H | 4.365866  | -3.018558 | -1.057940 |
| H | -2.756965 | 3.563945  | -3.251295 |
| H | 2.864096  | -3.117032 | 2.838842  |
| H | -0.528916 | 4.024621  | -2.442081 |
| H | 0.609036  | -3.503683 | 2.072258  |
| H | -4.932304 | 2.913332  | -2.934251 |
| H | 5.177736  | -2.847908 | 2.412144  |
| H | -5.624560 | 2.765399  | -1.319691 |
| H | 5.771655  | -2.729634 | 0.756203  |
| H | -5.639871 | 0.629756  | -0.137171 |
| H | 5.398070  | -0.599170 | -0.560265 |
| H | -5.396852 | -1.820661 | -0.224152 |
| H | 5.143284  | 1.850055  | -0.457088 |
| H | -3.459182 | -1.491923 | -4.039836 |
| H | 4.089691  | 1.564402  | 3.693889  |
| H | -3.695537 | 0.959636  | -3.948895 |
| H | 4.338374  | -0.884599 | 3.589517  |
| C | -0.186285 | 0.161305  | 0.541223  |
| C | 1.405499  | -0.147270 | -1.471392 |
| C | 0.179291  | -0.247490 | -1.985465 |
| H | 2.325765  | -0.290685 | -2.023168 |
| H | -0.044240 | -0.480966 | -3.018740 |
| C | -0.705361 | 0.157529  | 1.783869  |
| C | -0.916567 | -0.691637 | 4.208806  |
| C | -2.143894 | -0.796330 | 3.697406  |

|   |           |           |           |
|---|-----------|-----------|-----------|
| H | -0.619764 | -1.065752 | 5.181082  |
| H | -2.982183 | -1.265857 | 4.197559  |
| S | -1.177875 | 0.036322  | -0.913323 |
| S | 1.547765  | 0.254384  | 0.227702  |
| S | -2.437688 | -0.040549 | 2.128691  |
| S | 0.284695  | 0.189783  | 3.260420  |

# BIPY<sup>•+</sup>-CBPQT<sup>4+</sup>

| Atom | X         | Y         | Z         |
|------|-----------|-----------|-----------|
| N    | 2.897239  | 3.590011  | 1.525496  |
| N    | -2.752635 | -3.550323 | -1.466365 |
| N    | -3.558960 | 2.939392  | -1.057359 |
| N    | 3.728734  | -2.900675 | 1.064591  |
| C    | 4.289400  | 3.355910  | 2.001320  |
| C    | -4.145395 | -3.321539 | -1.942932 |
| C    | 1.872181  | 3.262589  | 2.334665  |
| C    | -1.728074 | -3.258808 | -2.289898 |
| C    | 0.577294  | 3.266503  | 1.868994  |
| C    | -0.431241 | -3.260214 | -1.829969 |
| C    | 0.315352  | 3.605545  | 0.537442  |
| C    | -0.164673 | -3.559661 | -0.489561 |
| C    | 1.393843  | 4.011393  | -0.255574 |
| C    | -1.244630 | -3.926382 | 0.321327  |
| C    | 2.671781  | 3.988120  | 0.259230  |
| C    | -2.524468 | -3.906985 | -0.188183 |
| C    | -1.049403 | 3.465402  | -0.023577 |
| C    | 1.205796  | -3.423296 | 0.058403  |
| C    | -2.180115 | 3.449167  | 0.799740  |
| C    | 2.329283  | -3.416007 | -0.775406 |
| C    | -3.418436 | 3.178766  | 0.260221  |
| C    | 3.574005  | -3.147280 | -0.249964 |
| C    | -2.499433 | 3.014071  | -1.885264 |



|   |           |           |           |
|---|-----------|-----------|-----------|
| C | 2.677442  | -2.968912 | 1.903304  |
| C | -1.240406 | 3.278314  | -1.396441 |
| C | 1.412801  | -3.231707 | 1.428673  |
| C | -4.855935 | 2.436712  | -1.590741 |
| C | 5.030496  | -2.394526 | 1.582794  |
| C | -4.781397 | 0.931760  | -1.710358 |
| C | 4.946687  | -0.891227 | 1.716431  |
| C | -4.896388 | 0.136343  | -0.566688 |
| C | 5.013242  | -0.087021 | 0.574559  |
| C | -4.728367 | -1.238964 | -0.650354 |
| C | 4.836186  | 1.285643  | 0.673932  |
| C | -4.442481 | -1.840593 | -1.879091 |
| C | 4.589259  | 1.876497  | 1.916732  |
| C | -4.364110 | -1.052183 | -3.025582 |
| C | 4.555759  | 1.079608  | 3.059018  |
| C | -4.532700 | 0.328676  | -2.941634 |
| C | 4.734114  | -0.299329 | 2.959273  |
| H | 4.356938  | 3.733644  | 3.021904  |
| H | -4.214662 | -3.713841 | -2.957894 |
| H | 4.951238  | 3.950250  | 1.371258  |
| H | -4.806985 | -3.906167 | -1.303569 |
| H | 2.121712  | 2.968773  | 3.345947  |
| H | -1.978512 | -2.998284 | -3.309945 |
| H | -0.201744 | 2.955176  | 2.552164  |
| H | 0.345959  | -2.979530 | -2.528030 |
| H | 1.268131  | 4.346831  | -1.276517 |
| H | -1.119182 | -4.229733 | 1.352231  |
| H | 3.535488  | 4.270929  | -0.327700 |
| H | -3.388158 | -4.161869 | 0.411354  |
| H | -2.124860 | 3.642371  | 1.862831  |
| H | 2.264744  | -3.613793 | -1.836930 |
| H | -4.314150 | 3.134901  | 0.865171  |

|   |           |           |           |
|---|-----------|-----------|-----------|
| H | 4.463596  | -3.110281 | -0.864282 |
| H | -2.684430 | 2.829590  | -2.935330 |
| H | 2.873145  | -2.776739 | 2.950115  |
| H | -0.420414 | 3.289757  | -2.102110 |
| H | 0.601374  | -3.236871 | 2.144188  |
| H | -5.026790 | 2.920101  | -2.552844 |
| H | 5.218805  | -2.884855 | 2.538147  |
| H | -5.635853 | 2.759168  | -0.900936 |
| H | 5.802197  | -2.705352 | 0.878426  |
| H | -5.115491 | 0.587019  | 0.396817  |
| H | 5.202530  | -0.529609 | -0.399059 |
| H | -4.819848 | -1.839987 | 0.249618  |
| H | 4.889986  | 1.893927  | -0.224307 |
| H | -4.169690 | -1.508084 | -3.991582 |
| H | 4.388002  | 1.526678  | 4.033991  |
| H | -4.466915 | 0.929379  | -3.843841 |
| H | 4.702103  | -0.907500 | 3.858282  |
| N | -0.639411 | -0.320901 | 3.415758  |
| C | 0.636874  | -0.124134 | 2.984339  |
| H | 1.398304  | -0.077131 | 3.753324  |
| C | 0.934000  | 0.004400  | 1.659851  |
| H | 1.976353  | 0.152121  | 1.403730  |
| C | -0.085458 | -0.059777 | 0.662731  |
| C | -1.405291 | -0.263994 | 1.163133  |
| H | -2.260649 | -0.331376 | 0.503599  |
| C | -1.645123 | -0.385977 | 2.500320  |
| H | -2.641433 | -0.540329 | 2.893840  |
| C | -0.914124 | -0.411374 | 4.852713  |
| H | -0.184576 | -1.075558 | 5.317113  |
| H | -1.912960 | -0.819161 | 5.000102  |
| N | 0.748803  | 0.325734  | -3.485228 |
| C | -0.527561 | 0.134464  | -3.053103 |

|   |           |           |           |
|---|-----------|-----------|-----------|
| H | -1.289314 | 0.089190  | -3.821810 |
| C | -0.824863 | 0.009618  | -1.728173 |
| H | -1.868139 | -0.132001 | -1.472384 |
| C | 0.195570  | 0.070647  | -0.731716 |
| C | 1.515549  | 0.271127  | -1.232737 |
| H | 2.370752  | 0.340206  | -0.573147 |
| C | 1.755047  | 0.389598  | -2.570387 |
| H | 2.751443  | 0.540699  | -2.964916 |
| C | 1.024640  | 0.410444  | -4.922399 |
| H | 0.288762  | 1.064008  | -5.391690 |
| H | 2.019248  | 0.828134  | -5.070774 |
| H | -0.851941 | 0.581028  | 5.303831  |
| H | 0.973675  | -0.585216 | -5.367688 |

---

BIPY<sup>•+</sup>-CBPQT<sup>•3+</sup>

---

| Atom | X         | Y         | Z         |
|------|-----------|-----------|-----------|
| N    | 3.594884  | 3.648042  | -1.639885 |
| N    | -2.291150 | -3.417643 | -4.111940 |
| N    | -3.179794 | 2.928690  | -3.507130 |
| N    | 4.289665  | -2.730490 | -1.795831 |
| C    | 5.011432  | 3.472659  | -1.274521 |
| C    | -3.706957 | -3.262682 | -4.550926 |
| C    | 2.626453  | 3.513122  | -0.687680 |
| C    | -1.297203 | -3.149423 | -4.982020 |
| C    | 1.307671  | 3.434648  | -1.013304 |
| C    | 0.009971  | -3.075101 | -4.559657 |
| C    | 0.876162  | 3.472030  | -2.375492 |
| C    | 0.323570  | -3.285409 | -3.210472 |
| C    | 1.921643  | 3.646754  | -3.332126 |
| C    | -0.726911 | -3.611672 | -2.344417 |
| C    | 3.226821  | 3.716758  | -2.951272 |
| C    | -2.019014 | -3.661821 | -2.816193 |

|   |           |           |           |
|---|-----------|-----------|-----------|
| C | -0.490337 | 3.327731  | -2.751119 |
| C | 1.709980  | -3.142126 | -2.715179 |
| C | -1.532423 | 3.111072  | -1.799013 |
| C | 2.804406  | -3.172720 | -3.587416 |
| C | -2.819737 | 2.906412  | -2.191606 |
| C | 4.076693  | -2.960026 | -3.105212 |
| C | -2.222538 | 3.169681  | -4.450130 |
| C | 3.262727  | -2.739096 | -0.923228 |
| C | -0.920311 | 3.372196  | -4.113605 |
| C | 1.972488  | -2.943026 | -1.353786 |
| C | -4.510456 | 2.450551  | -3.919774 |
| C | 5.635939  | -2.292639 | -1.327409 |
| C | -4.463958 | 0.953129  | -4.128930 |
| C | 5.647842  | -0.784043 | -1.268597 |
| C | -4.765711 | 0.078152  | -3.084443 |
| C | 5.901355  | -0.039415 | -2.422400 |
| C | -4.575205 | -1.291994 | -3.236260 |
| C | 5.750477  | 1.342577  | -2.409954 |
| C | -4.078897 | -1.803399 | -4.436273 |
| C | 5.344354  | 1.997752  | -1.245514 |
| C | -3.826053 | -0.934432 | -5.498733 |
| C | 5.147576  | 1.257269  | -0.079945 |
| C | -4.018559 | 0.433076  | -5.345561 |
| C | 5.297751  | -0.125269 | -0.090376 |
| H | 5.167027  | 3.941388  | -0.300893 |
| H | -3.772606 | -3.631273 | -5.574796 |
| H | 5.615556  | 4.009622  | -2.007634 |
| H | -4.318407 | -3.903119 | -3.914973 |
| H | 2.968773  | 3.472391  | 0.338621  |
| H | -1.580928 | -2.973764 | -6.011158 |
| H | 0.604773  | 3.340651  | -0.196774 |
| H | 0.759767  | -2.819870 | -5.296159 |

|   |           |           |           |
|---|-----------|-----------|-----------|
| H | 1.718230  | 3.713601  | -4.392531 |
| H | -0.567894 | -3.834558 | -1.298017 |
| H | 4.029776  | 3.827437  | -3.669029 |
| H | -2.859290 | -3.886687 | -2.173470 |
| H | -1.335034 | 3.080066  | -0.735730 |
| H | 2.696281  | -3.365012 | -4.646235 |
| H | -3.614087 | 2.714617  | -1.481348 |
| H | 4.944723  | -2.956764 | -3.750665 |
| H | -2.559837 | 3.192899  | -5.478505 |
| H | 3.499628  | -2.553586 | 0.116011  |
| H | -0.228593 | 3.565346  | -4.922217 |
| H | 1.186973  | -2.906354 | -0.611397 |
| H | -4.785720 | 2.976301  | -4.836023 |
| H | 5.807491  | -2.751432 | -0.353351 |
| H | -5.224582 | 2.730274  | -3.143561 |
| H | 6.368431  | -2.689598 | -2.030115 |
| H | -5.144885 | 0.463958  | -2.142364 |
| H | 6.209694  | -0.536214 | -3.338107 |
| H | -4.808822 | -1.958094 | -2.410258 |
| H | 5.943491  | 1.909804  | -3.316293 |
| H | -3.472268 | -1.319930 | -6.450620 |
| H | 4.866513  | 1.755629  | 0.843094  |
| H | -3.813316 | 1.095661  | -6.181282 |
| H | 5.133360  | -0.686168 | 0.825125  |
| N | -0.973136 | -0.281762 | 0.367349  |
| C | 0.362538  | -0.028773 | 0.273343  |
| H | 0.902293  | 0.027716  | 1.210255  |
| C | 0.976644  | 0.142098  | -0.931234 |
| H | 2.039009  | 0.347932  | -0.915366 |
| C | 0.240018  | 0.074034  | -2.152878 |
| C | -1.157177 | -0.161169 | -2.000280 |
| H | -1.825847 | -0.205737 | -2.850593 |

|   |           |           |           |
|---|-----------|-----------|-----------|
| C | -1.717823 | -0.334874 | -0.769412 |
| H | -2.776947 | -0.517884 | -0.640872 |
| C | -1.597904 | -0.422904 | 1.684569  |
| H | -0.965073 | -1.044310 | 2.318979  |
| H | -2.568504 | -0.903418 | 1.569071  |
| N | 2.074712  | 0.507779  | -5.958026 |
| C | 0.722161  | 0.389649  | -5.853517 |
| H | 0.168839  | 0.414930  | -6.783742 |
| C | 0.105231  | 0.252522  | -4.645845 |
| H | -0.975264 | 0.186021  | -4.652337 |
| C | 0.855662  | 0.230421  | -3.431435 |
| C | 2.264178  | 0.375259  | -3.591302 |
| H | 2.936641  | 0.399069  | -2.743337 |
| C | 2.829204  | 0.497469  | -4.826081 |
| H | 3.898052  | 0.600988  | -4.961817 |
| C | 2.704831  | 0.595009  | -7.277436 |
| H | 2.080701  | 1.202048  | -7.933558 |
| H | 3.680591  | 1.068785  | -7.176205 |
| H | -1.728187 | 0.560642  | 2.141407  |
| H | 2.823857  | -0.404671 | -7.701225 |

---

BIPY<sup>2(+)</sup>-CBPQT<sup>2(+)</sup>(T)

---

| Atom | X        | Y         | Z         |
|------|----------|-----------|-----------|
| N    | 1.985538 | -4.325995 | -0.375799 |
| N    | 2.705668 | 2.026047  | -3.386783 |
| C    | 1.608620 | -5.506878 | 0.420190  |
| H    | 2.500233 | -5.853966 | 0.946010  |
| H    | 1.297764 | -6.291541 | -0.271747 |
| C    | 1.287438 | -4.012097 | -1.505169 |
| H    | 0.605125 | -4.769604 | -1.870085 |
| C    | 1.440976 | -2.813696 | -2.131203 |
| H    | 0.856181 | -2.650089 | -3.026614 |

|   |           |           |           |
|---|-----------|-----------|-----------|
| C | 2.324073  | -1.814596 | -1.618813 |
| C | 3.046900  | -2.195564 | -0.445404 |
| H | 3.759338  | -1.531413 | 0.024465  |
| C | 2.858242  | -3.409779 | 0.137224  |
| H | 3.390394  | -3.706640 | 1.031930  |
| C | 2.468675  | -0.535352 | -2.224269 |
| C | 1.707384  | -0.135904 | -3.366762 |
| H | 0.998955  | -0.802565 | -3.839188 |
| C | 1.836358  | 1.107576  | -3.901778 |
| H | 1.258669  | 1.426637  | -4.759943 |
| C | 3.464882  | 1.682285  | -2.306583 |
| H | 4.137171  | 2.444953  | -1.933735 |
| C | 3.378298  | 0.450986  | -1.733834 |
| H | 4.022369  | 0.259386  | -0.885931 |
| C | 2.620739  | 3.433789  | -3.812130 |
| H | 3.598907  | 3.891964  | -3.656261 |
| H | 2.409367  | 3.447383  | -4.883175 |
| C | 1.540743  | 4.131677  | -3.017395 |
| C | 0.203590  | 4.014133  | -3.402738 |
| H | -0.053879 | 3.526483  | -4.338742 |
| C | -0.808285 | 4.509520  | -2.590569 |
| H | -1.843149 | 4.401532  | -2.902706 |
| C | -0.501806 | 5.131394  | -1.378280 |
| C | 0.835591  | 5.297470  | -1.019263 |
| H | 1.091402  | 5.806900  | -0.094052 |
| C | 1.850082  | 4.800966  | -1.833532 |
| H | 2.887367  | 4.927736  | -1.535389 |
| N | -1.986197 | 4.325432  | 0.375305  |
| N | -2.706170 | -2.026373 | 3.386865  |
| C | -1.609506 | 5.506377  | -0.420708 |
| H | -2.501163 | 5.853245  | -0.946596 |
| H | -1.298872 | 6.291119  | 0.271241  |

|   |           |           |           |
|---|-----------|-----------|-----------|
| C | -1.288061 | 4.011695  | 1.504697  |
| H | -0.605849 | 4.769310  | 1.869572  |
| C | -1.441424 | 2.813303  | 2.130792  |
| H | -0.856505 | 2.649786  | 3.026137  |
| C | -2.324470 | 1.814100  | 1.618519  |
| C | -3.047274 | 2.194877  | 0.445033  |
| H | -3.759600 | 1.530596  | -0.024818 |
| C | -2.858703 | 3.409046  | -0.137725 |
| H | -3.390743 | 3.705723  | -1.032561 |
| C | -2.469090 | 0.534930  | 2.224131  |
| C | -1.708115 | 0.135695  | 3.366913  |
| H | -0.999972 | 0.802507  | 3.839554  |
| C | -1.837159 | -1.107724 | 3.902063  |
| H | -1.259807 | -1.426578 | 4.760535  |
| C | -3.465069 | -1.682812 | 2.306378  |
| H | -4.137125 | -2.445610 | 1.933377  |
| C | -3.378475 | -0.451555 | 1.733548  |
| H | -4.022318 | -0.260116 | 0.885433  |
| C | -2.621119 | -3.434111 | 3.812198  |
| H | -3.599275 | -3.892354 | 3.656453  |
| H | -2.409624 | -3.447688 | 4.883220  |
| C | -1.541174 | -4.131949 | 3.017336  |
| C | -0.203862 | -4.013181 | 3.401806  |
| H | 0.053858  | -3.524584 | 4.337245  |
| C | 0.807846  | -4.508611 | 2.589497  |
| H | 1.842814  | -4.399695 | 2.900961  |
| C | 0.501083  | -5.131714 | 1.377889  |
| C | -0.836397 | -5.299010 | 1.019793  |
| H | -1.092411 | -5.809319 | 0.095119  |
| C | -1.850758 | -4.802454 | 1.834240  |
| H | -2.888129 | -4.930127 | 1.536787  |
| N | 2.397488  | 1.716029  | 1.947934  |



|   |           |           |           |
|---|-----------|-----------|-----------|
| C | 1.826231  | 2.315080  | 0.866370  |
| H | 2.149521  | 3.326889  | 0.657278  |
| C | 0.902463  | 1.676830  | 0.096242  |
| H | 0.505850  | 2.227093  | -0.748376 |
| C | 0.484316  | 0.344982  | 0.391701  |
| C | 1.111472  | -0.243725 | 1.533833  |
| H | 0.883518  | -1.252566 | 1.851960  |
| C | 2.029257  | 0.443254  | 2.268846  |
| H | 2.508662  | 0.013170  | 3.139004  |
| C | 3.326545  | 2.466162  | 2.792567  |
| H | 3.967119  | 3.084801  | 2.163195  |
| H | 3.947542  | 1.768078  | 3.353172  |
| N | -2.396604 | -1.717203 | -1.946688 |
| C | -1.825227 | -2.316158 | -0.865143 |
| H | -2.148099 | -3.328081 | -0.655998 |
| C | -0.901646 | -1.677726 | -0.094957 |
| H | -0.504908 | -2.227987 | 0.749603  |
| C | -0.483717 | -0.345813 | -0.390367 |
| C | -1.111019 | 0.242828  | -1.532456 |
| H | -0.883270 | 1.251735  | -1.850513 |
| C | -2.028657 | -0.444313 | -2.267506 |
| H | -2.508158 | -0.014275 | -3.137635 |
| C | -3.325454 | -2.467519 | -2.791379 |
| H | -3.965937 | -3.086293 | -2.162045 |
| H | -3.946563 | -1.769562 | -3.352019 |
| H | 2.770984  | 3.100842  | 3.487333  |
| H | -2.769721 | -3.102084 | -3.486114 |

---

BIPY<sup>•+</sup>-CBPQT<sup>2(•+)</sup>(S)

---

| Atom | X         | Y         | Z         |
|------|-----------|-----------|-----------|
| N    | 3.074116  | 3.560292  | 1.093925  |
| N    | -3.037941 | -3.605318 | -1.169430 |

|   |           |           |           |
|---|-----------|-----------|-----------|
| N | -3.622212 | 2.864447  | -1.053514 |
| N | 3.689690  | -2.852084 | 0.840822  |
| C | 4.470550  | 3.365319  | 1.520698  |
| C | -4.435015 | -3.380097 | -1.576297 |
| C | 2.061142  | 3.478551  | 2.006047  |
| C | -2.040183 | -3.605850 | -2.101909 |
| C | 0.757152  | 3.402984  | 1.625034  |
| C | -0.728225 | -3.542231 | -1.747507 |
| C | 0.387344  | 3.377959  | 0.243648  |
| C | -0.333499 | -3.448737 | -0.376958 |
| C | 1.478774  | 3.491572  | -0.671234 |
| C | -1.410203 | -3.493944 | 0.562332  |
| C | 2.765022  | 3.568501  | -0.235205 |
| C | -2.704798 | -3.558961 | 0.153268  |
| C | -0.959835 | 3.233785  | -0.190018 |
| C | 1.020759  | -3.286844 | 0.026298  |
| C | -2.060961 | 3.168441  | 0.717328  |
| C | 2.108838  | -3.232143 | -0.898951 |
| C | -3.333734 | 2.975524  | 0.274916  |
| C | 3.384967  | -3.008581 | -0.480238 |
| C | -2.603353 | 2.947795  | -1.958950 |
| C | 2.684075  | -2.922208 | 1.761479  |
| C | -1.313353 | 3.132598  | -1.572367 |
| C | 1.391858  | -3.133211 | 1.397972  |
| C | -4.952508 | 2.406838  | -1.490667 |
| C | 5.029748  | -2.406577 | 1.263429  |
| C | -4.970101 | 0.896894  | -1.564785 |
| C | 5.054367  | -0.900061 | 1.389286  |
| C | -5.397773 | 0.134010  | -0.478436 |
| C | 5.454434  | -0.103550 | 0.316840  |
| C | -5.272815 | -1.252991 | -0.499134 |
| C | 5.325046  | 1.281158  | 0.381406  |

|   |           |           |           |
|---|-----------|-----------|-----------|
| C | -4.718042 | -1.895234 | -1.605858 |
| C | 4.790459  | 1.888081  | 1.517651  |
| C | -4.331839 | -1.134325 | -2.711096 |
| C | 4.445637  | 1.094867  | 2.613820  |
| C | -4.458235 | 0.248432  | -2.690977 |
| C | 4.580728  | -0.286386 | 2.551200  |
| H | 4.580606  | 3.803499  | 2.514422  |
| H | -4.574729 | -3.839117 | -2.556912 |
| H | 5.113028  | 3.920117  | 0.834417  |
| H | -5.081122 | -3.899235 | -0.865930 |
| H | 2.356107  | 3.479506  | 3.047826  |
| H | -2.354562 | -3.657732 | -3.136697 |
| H | 0.017756  | 3.348156  | 2.412493  |
| H | -0.000907 | -3.548326 | -2.548392 |
| H | 1.323307  | 3.512166  | -1.741389 |
| H | -1.236857 | -3.458939 | 1.629240  |
| H | 3.601077  | 3.636373  | -0.919878 |
| H | -3.530141 | -3.565569 | 0.854166  |
| H | -1.921135 | 3.257476  | 1.786361  |
| H | 1.955291  | -3.350656 | -1.963299 |
| H | -4.173710 | 2.902050  | 0.954101  |
| H | 4.214270  | -2.941404 | -1.173168 |
| H | -2.882168 | 2.858923  | -3.001092 |
| H | 2.974345  | -2.801105 | 2.796946  |
| H | -0.569738 | 3.187258  | -2.355700 |
| H | 0.660255  | -3.169391 | 2.193548  |
| H | -5.157729 | 2.861097  | -2.462125 |
| H | 5.255431  | -2.893286 | 2.214596  |
| H | -5.688305 | 2.785711  | -0.778943 |
| H | 5.748963  | -2.762813 | 0.524068  |
| H | -5.826594 | 0.620526  | 0.393449  |
| H | 5.858709  | -0.563162 | -0.581037 |

|   |           |           |           |
|---|-----------|-----------|-----------|
| H | -5.603084 | -1.833974 | 0.357739  |
| H | 5.629585  | 1.888189  | -0.466974 |
| H | -3.926028 | -1.620221 | -3.593765 |
| H | 4.061200  | 1.553537  | 3.520406  |
| H | -4.152899 | 0.823199  | -3.560623 |
| H | 4.308038  | -0.886124 | 3.414823  |
| N | -2.018647 | 0.010245  | 3.135615  |
| C | -2.609278 | -0.129658 | 1.914505  |
| H | -3.685087 | -0.253029 | 1.917684  |
| C | -1.885883 | -0.116376 | 0.762231  |
| H | -2.436895 | -0.230018 | -0.163124 |
| C | -0.466404 | 0.041432  | 0.778182  |
| C | 0.109624  | 0.169880  | 2.079575  |
| H | 1.176732  | 0.281990  | 2.219947  |
| C | -0.663925 | 0.153609  | 3.200366  |
| H | -0.241626 | 0.251919  | 4.192260  |
| C | -2.824789 | -0.073266 | 4.353218  |
| H | -3.777726 | 0.431163  | 4.189930  |
| H | -2.297642 | 0.421119  | 5.168879  |
| N | 1.855254  | 0.049451  | -2.773998 |
| C | 2.448649  | 0.218382  | -1.559646 |
| H | 3.523416  | 0.343447  | -1.570942 |
| C | 1.732531  | 0.222045  | -0.402279 |
| H | 2.288209  | 0.353781  | 0.518607  |
| C | 0.313721  | 0.061356  | -0.411163 |
| C | -0.266429 | -0.094266 | -1.707678 |
| H | -1.331467 | -0.230247 | -1.842763 |
| C | 0.501343  | -0.095358 | -2.831997 |
| H | 0.075351  | -0.218416 | -3.819519 |
| C | 2.660331  | 0.104179  | -3.993888 |
| H | 3.608122  | -0.407630 | -3.823426 |
| H | 2.126466  | -0.397611 | -4.800538 |

| H                                       | -3.003405 | -1.119359 | 4.613900  |
|-----------------------------------------|-----------|-----------|-----------|
| H                                       | 2.849201  | 1.144166  | -4.271335 |
| BIPY <sup>•+</sup> -CBPQT <sup>•+</sup> |           |           |           |
| Atom                                    | X         | Y         | Z         |
| N                                       | 2.983155  | 3.538630  | 1.085699  |
| N                                       | -3.016037 | -3.687335 | -1.189045 |
| N                                       | -3.748295 | 2.845262  | -0.943048 |
| N                                       | 3.758597  | -2.993242 | 0.919914  |
| C                                       | 4.383835  | 3.330082  | 1.488230  |
| C                                       | -4.395862 | -3.423953 | -1.588959 |
| C                                       | 1.986404  | 3.425986  | 2.013100  |
| C                                       | -1.995377 | -3.455494 | -2.099759 |
| C                                       | 0.678120  | 3.347300  | 1.654477  |
| C                                       | -0.712464 | -3.277549 | -1.731027 |
| C                                       | 0.282525  | 3.360520  | 0.278898  |
| C                                       | -0.295797 | -3.287322 | -0.331885 |
| C                                       | 1.356423  | 3.511220  | -0.651922 |
| C                                       | -1.415626 | -3.466819 | 0.586833  |
| C                                       | 2.650092  | 3.578268  | -0.236978 |
| C                                       | -2.680271 | -3.635373 | 0.156189  |
| C                                       | -1.070456 | 3.220926  | -0.128814 |
| C                                       | 1.010238  | -3.154048 | 0.073360  |
| C                                       | -2.141458 | 3.047667  | 0.801395  |
| C                                       | 2.133857  | -3.012870 | -0.847448 |
| C                                       | -3.420164 | 2.852234  | 0.381439  |
| C                                       | 3.407779  | -2.923712 | -0.420881 |
| C                                       | -2.761151 | 3.036549  | -1.867690 |
| C                                       | 2.719759  | -3.061505 | 1.837282  |
| C                                       | -1.465668 | 3.227999  | -1.504596 |
| C                                       | 1.426342  | -3.151044 | 1.472726  |
| C                                       | -5.068086 | 2.352124  | -1.370480 |

|   |           |           |           |
|---|-----------|-----------|-----------|
| C | 5.045767  | -2.449797 | 1.346095  |
| C | -5.033905 | 0.845187  | -1.474651 |
| C | 5.008707  | -0.938880 | 1.428771  |
| C | -5.426751 | 0.046826  | -0.400821 |
| C | 5.403105  | -0.152409 | 0.346020  |
| C | -5.262832 | -1.335124 | -0.453697 |
| C | 5.248135  | 1.231057  | 0.380490  |
| C | -4.703641 | -1.942044 | -1.578372 |
| C | 4.693582  | 1.851337  | 1.499521  |
| C | -4.343535 | -1.142231 | -2.666274 |
| C | 4.331104  | 1.069261  | 2.598622  |
| C | -4.506468 | 0.236181  | -2.615609 |
| C | 4.487295  | -0.310410 | 2.562527  |
| H | 4.516184  | 3.779176  | 2.474898  |
| H | -4.542819 | -3.844202 | -2.588218 |
| H | 5.019648  | 3.870717  | 0.784498  |
| H | -5.056609 | -3.963189 | -0.904454 |
| H | 2.300164  | 3.406786  | 3.049136  |
| H | -2.296859 | -3.454902 | -3.141563 |
| H | -0.046863 | 3.269950  | 2.453226  |
| H | 0.013092  | -3.134057 | -2.522554 |
| H | 1.181587  | 3.553404  | -1.718722 |
| H | -1.256684 | -3.467645 | 1.658675  |
| H | 3.474004  | 3.662155  | -0.934583 |
| H | -3.508972 | -3.759654 | 0.844907  |
| H | -1.970039 | 3.039068  | 1.869523  |
| H | 1.969877  | -2.972597 | -1.917678 |
| H | -4.235072 | 2.687882  | 1.075393  |
| H | 4.237421  | -2.810416 | -1.110401 |
| H | -3.072209 | 3.029632  | -2.904818 |
| H | 3.022729  | -3.066407 | 2.878720  |
| H | -0.749200 | 3.381024  | -2.300220 |

|   |           |           |           |
|---|-----------|-----------|-----------|
| H | 0.694236  | -3.231789 | 2.267060  |
| H | -5.301971 | 2.819172  | -2.329322 |
| H | 5.289654  | -2.886658 | 2.318758  |
| H | -5.806063 | 2.691530  | -0.640913 |
| H | 5.806868  | -2.781839 | 0.634382  |
| H | -5.859253 | 0.503500  | 0.485720  |
| H | 5.831461  | -0.621964 | -0.535699 |
| H | -5.569362 | -1.944603 | 0.392646  |
| H | 5.557641  | 1.828508  | -0.473396 |
| H | -3.932846 | -1.598585 | -3.562523 |
| H | 3.924644  | 1.537354  | 3.490982  |
| H | -4.220419 | 0.839865  | -3.472837 |
| H | 4.200878  | -0.902685 | 3.427232  |
| N | -1.896934 | -0.236841 | 2.949874  |
| C | -2.508409 | -0.311764 | 1.733781  |
| H | -3.579224 | -0.470379 | 1.748433  |
| C | -1.811169 | -0.203221 | 0.570735  |
| H | -2.377403 | -0.287932 | -0.348652 |
| C | -0.396743 | -0.011963 | 0.569235  |
| C | 0.204721  | 0.041832  | 1.866025  |
| H | 1.270956  | 0.176605  | 1.991815  |
| C | -0.542977 | -0.067657 | 2.997482  |
| H | -0.103063 | -0.024143 | 3.985830  |
| C | -2.673976 | -0.427304 | 4.172433  |
| H | -3.644728 | 0.057804  | 4.062306  |
| H | -2.145686 | 0.026748  | 5.010674  |
| N | 1.848987  | 0.423980  | -3.004674 |
| C | 2.471268  | 0.400129  | -1.791823 |
| H | 3.549547  | 0.495720  | -1.807966 |
| C | 1.777952  | 0.251425  | -0.630853 |
| H | 2.357880  | 0.215373  | 0.283411  |
| C | 0.356441  | 0.120962  | -0.627266 |

|   |           |           |           |
|---|-----------|-----------|-----------|
| C | -0.252272 | 0.135656  | -1.921983 |
| H | -1.321174 | 0.023496  | -2.047715 |
| C | 0.490442  | 0.293011  | -3.050901 |
| H | 0.043515  | 0.317865  | -4.036774 |
| C | 2.618432  | 0.674546  | -4.220884 |
| H | 3.596268  | 0.199655  | -4.132756 |
| H | 2.094181  | 0.245919  | -5.075055 |
| H | -2.818481 | -1.493217 | 4.367190  |
| H | 2.747415  | 1.749338  | -4.373994 |

BIPY<sup>++</sup>-CBPQT<sup>0</sup>

| Atom | X         | Y         | Z         |
|------|-----------|-----------|-----------|
| N    | 3.207379  | 3.952582  | 1.474633  |
| N    | -3.154313 | -4.058597 | -1.546723 |
| N    | -3.277405 | 2.770041  | -1.262857 |
| N    | 3.327492  | -2.876131 | 1.197579  |
| C    | 4.496134  | 3.476888  | 1.975796  |
| C    | -4.443220 | -3.582575 | -2.047117 |
| C    | 2.088244  | 3.767716  | 2.285976  |
| C    | -2.034950 | -3.870782 | -2.357079 |
| C    | 0.850338  | 3.580252  | 1.797021  |
| C    | -0.797366 | -3.683907 | -1.867072 |
| C    | 0.579439  | 3.493189  | 0.362404  |
| C    | -0.527258 | -3.600228 | -0.432116 |
| C    | 1.773978  | 3.725364  | -0.448544 |
| C    | -1.721855 | -3.836285 | 0.377657  |
| C    | 2.988163  | 3.911983  | 0.099106  |
| C    | -2.935669 | -4.022344 | -0.171002 |
| C    | -0.657018 | 3.220170  | -0.164738 |
| C    | 0.708439  | -3.326582 | 0.096407  |
| C    | -1.843593 | 2.968034  | 0.648747  |
| C    | 1.895491  | -3.072132 | -0.715649 |



|   |           |           |           |
|---|-----------|-----------|-----------|
| C | -3.056643 | 2.755202  | 0.103873  |
| C | 3.107932  | -2.859487 | -0.169373 |
| C | -2.169439 | 2.911831  | -2.080690 |
| C | 2.218731  | -3.019024 | 2.014205  |
| C | -0.933545 | 3.143286  | -1.597728 |
| C | 0.983466  | -3.250761 | 1.529766  |
| C | -4.529218 | 2.253587  | -1.803357 |
| C | 4.578606  | -2.359624 | 1.739675  |
| C | -4.560121 | 0.741985  | -1.889961 |
| C | 4.610252  | -0.847933 | 1.824572  |
| C | -4.838219 | -0.023927 | -0.754596 |
| C | 4.892612  | -0.083645 | 0.689178  |
| C | -4.827021 | -1.411713 | -0.815391 |
| C | 4.882231  | 1.304231  | 0.748183  |
| C | -4.539212 | -2.071682 | -2.013748 |
| C | 4.591277  | 1.965904  | 1.944810  |
| C | -4.268240 | -1.307082 | -3.148600 |
| C | 4.316126  | 1.202933  | 3.079772  |
| C | -4.279539 | 0.085021  | -3.087014 |
| C | 4.326333  | -0.189238 | 3.019914  |
| H | 4.623194  | 3.851186  | 2.996153  |
| H | -4.570131 | -3.955143 | -3.068132 |
| H | 5.281746  | 3.925910  | 1.360000  |
| H | -5.228626 | -4.033040 | -1.432112 |
| H | 2.284970  | 3.815019  | 3.352377  |
| H | -2.231250 | -3.915127 | -3.423691 |
| H | 0.044134  | 3.496456  | 2.516520  |
| H | 0.009095  | -3.597546 | -2.585988 |
| H | 1.706317  | 3.763602  | -1.529619 |
| H | -1.654374 | -3.878631 | 1.458593  |
| H | 3.872319  | 4.077705  | -0.508412 |
| H | -3.819860 | -4.191266 | 0.435602  |

|   |           |           |           |
|---|-----------|-----------|-----------|
| H | -1.776714 | 2.941583  | 1.729714  |
| H | 1.829521  | -3.044022 | -1.796634 |
| H | -3.935525 | 2.578867  | 0.714063  |
| H | 3.987262  | -2.681906 | -0.778544 |
| H | -2.366278 | 2.837232  | -3.144720 |
| H | 2.414432  | -2.945017 | 3.078499  |
| H | -0.135322 | 3.254412  | -2.321708 |
| H | 0.184449  | -3.362314 | 2.252771  |
| H | -4.676180 | 2.695787  | -2.792907 |
| H | 4.723546  | -2.800809 | 2.729966  |
| H | -5.341334 | 2.613987  | -1.164369 |
| H | 5.391747  | -2.721164 | 1.102622  |
| H | -5.079723 | 0.466757  | 0.184523  |
| H | 5.137021  | -0.575638 | -0.248504 |
| H | -5.056247 | -1.987553 | 0.077293  |
| H | 5.114748  | 1.878801  | -0.144475 |
| H | -4.052670 | -1.800911 | -4.093062 |
| H | 4.098161  | 1.698111  | 4.022984  |
| H | -4.071426 | 0.663068  | -3.984191 |
| H | 4.114857  | -0.766019 | 3.917118  |
| N | -0.374876 | -0.316263 | 3.464983  |
| C | -1.375474 | -0.705836 | 2.619685  |
| H | -2.267314 | -1.101318 | 3.089927  |
| C | -1.255123 | -0.596146 | 1.270058  |
| H | -2.094884 | -0.926177 | 0.672072  |
| C | -0.058030 | -0.097477 | 0.667983  |
| C | 0.956532  | 0.302562  | 1.589455  |
| H | 1.894720  | 0.729019  | 1.257585  |
| C | 0.777088  | 0.186866  | 2.931388  |
| H | 1.536262  | 0.491916  | 3.640407  |
| C | -0.484379 | -0.523556 | 4.905258  |
| H | -1.537226 | -0.567777 | 5.184657  |

|   |           |           |           |
|---|-----------|-----------|-----------|
| H | -0.014602 | 0.310790  | 5.428369  |
| N | 0.422603  | 0.212174  | -3.533630 |
| C | 1.426276  | 0.595425  | -2.687600 |
| H | 2.319020  | 0.987637  | -3.159239 |
| C | 1.306403  | 0.484264  | -1.338560 |
| H | 2.148139  | 0.808946  | -0.740388 |
| C | 0.107512  | -0.011081 | -0.736655 |
| C | -0.908537 | -0.406067 | -1.658223 |
| H | -1.848046 | -0.829744 | -1.326662 |
| C | -0.730423 | -0.286780 | -3.000520 |
| H | -1.492663 | -0.586773 | -3.708124 |
| C | 0.546256  | 0.435189  | -4.970349 |
| H | 1.575874  | 0.249868  | -5.279933 |
| H | -0.110966 | -0.254367 | -5.500710 |
| H | 0.007064  | -1.457107 | 5.193666  |
| H | 0.270774  | 1.463781  | -5.220414 |

NDI<sup>•-</sup>-CBPQT<sup>4+</sup>

| Atom | X         | Y         | Z         |
|------|-----------|-----------|-----------|
| N    | 2.697542  | 3.208650  | 1.461452  |
| N    | -2.772337 | -3.264440 | -1.408393 |
| N    | -3.797786 | 2.816795  | -1.357350 |
| N    | 3.728782  | -2.868753 | 1.397621  |
| C    | 4.085217  | 3.182945  | 2.049513  |
| C    | -4.159815 | -3.237954 | -1.996298 |
| C    | 1.613420  | 3.122958  | 2.258132  |
| C    | -1.689298 | -3.173908 | -2.205853 |
| C    | 0.333054  | 3.148517  | 1.737494  |
| C    | -0.408505 | -3.198786 | -1.686707 |
| C    | 0.119430  | 3.259176  | 0.356309  |
| C    | -0.192679 | -3.313229 | -0.306218 |
| C    | 1.270389  | 3.355082  | -0.439403 |

|   |           |           |           |
|---|-----------|-----------|-----------|
| C | -1.342858 | -3.415153 | 0.490553  |
| C | 2.528387  | 3.324241  | 0.129437  |
| C | -2.601412 | -3.385787 | -0.076787 |
| C | -1.253550 | 3.204031  | -0.243641 |
| C | 1.181138  | -3.256594 | 0.290534  |
| C | -2.413928 | 3.210141  | 0.541583  |
| C | 2.338853  | -3.255139 | -0.498448 |
| C | -3.656372 | 3.009604  | -0.031383 |
| C | 3.582773  | -3.054111 | 0.071318  |
| C | -2.709095 | 2.867152  | -2.151109 |
| C | 2.642441  | -2.926578 | 2.195126  |
| C | -1.447924 | 3.068704  | -1.624967 |
| C | 1.380303  | -3.128500 | 1.672459  |
| C | -5.134351 | 2.431686  | -1.933811 |
| C | 5.067097  | -2.484579 | 1.970608  |
| C | -5.233174 | 0.924250  | -2.070948 |
| C | 5.165269  | -0.977606 | 2.113473  |
| C | -5.567719 | 0.135789  | -0.963492 |
| C | 5.510500  | -0.183534 | 1.012938  |
| C | -5.315838 | -1.231552 | -0.973098 |
| C | 5.256324  | 1.183541  | 1.026279  |
| C | -4.723962 | -1.834582 | -2.088993 |
| C | 4.651503  | 1.780312  | 2.138972  |
| C | -4.580179 | -1.083336 | -3.256104 |
| C | 4.496404  | 1.023348  | 3.300665  |
| C | -4.835210 | 0.288089  | -3.248013 |
| C | 4.753922  | -0.347379 | 3.288931  |
| H | 4.006190  | 3.651003  | 3.030939  |
| H | -4.081760 | -3.708463 | -2.976627 |
| H | 4.692315  | 3.829170  | 1.414976  |
| H | -4.768126 | -3.881432 | -1.360116 |
| H | 1.793511  | 3.023645  | 3.320473  |

|   |           |           |           |
|---|-----------|-----------|-----------|
| H | -1.870979 | -3.070761 | -3.267562 |
| H | -0.479963 | 3.051362  | 2.444996  |
| H | 0.403403  | -3.097949 | -2.394830 |
| H | 1.226155  | 3.458869  | -1.515025 |
| H | -1.296986 | -3.522580 | 1.565769  |
| H | 3.424995  | 3.393152  | -0.472412 |
| H | -3.497230 | -3.459830 | 0.525572  |
| H | -2.390011 | 3.350317  | 1.614144  |
| H | 2.311897  | -3.389653 | -1.571640 |
| H | -4.558982 | 2.983412  | 0.564573  |
| H | 4.482879  | -3.021617 | -0.528119 |
| H | -2.862416 | 2.695320  | -3.208146 |
| H | 2.799147  | -2.762275 | 3.252723  |
| H | -0.625172 | 3.062088  | -2.327150 |
| H | 0.559798  | -3.128242 | 2.377399  |
| H | -5.219932 | 2.939841  | -2.894700 |
| H | 5.156530  | -2.996384 | 2.929216  |
| H | -5.889435 | 2.836314  | -1.259555 |
| H | 5.820124  | -2.886072 | 1.292137  |
| H | -5.959497 | 0.596765  | -0.061230 |
| H | 5.911718  | -0.640059 | 0.112636  |
| H | -5.518206 | -1.812017 | -0.077595 |
| H | 5.467123  | 1.768787  | 0.135850  |
| H | -4.178914 | -1.537892 | -4.155617 |
| H | 4.084992  | 1.472941  | 4.198040  |
| H | -4.622337 | 0.867741  | -4.140094 |
| H | 4.533440  | -0.931081 | 4.176512  |
| C | 0.971502  | -0.045333 | 1.556830  |
| C | -0.135148 | -0.033333 | 0.699658  |
| C | 2.260062  | -0.038858 | 1.017825  |
| C | 0.777923  | -0.122299 | 2.999475  |
| C | 0.087531  | -0.017675 | -0.709107 |

|   |           |           |           |
|---|-----------|-----------|-----------|
| C | -1.442885 | -0.032600 | 1.216034  |
| C | 1.396001  | -0.016107 | -1.223079 |
| C | -1.018772 | -0.006834 | -1.567826 |
| C | 2.480990  | -0.022278 | -0.342769 |
| C | 1.619673  | -0.006584 | -2.664274 |
| C | -1.675468 | -0.036446 | 2.655805  |
| C | -2.527147 | -0.026548 | 0.333970  |
| C | -0.833689 | 0.073273  | -3.011341 |
| C | -2.307539 | -0.012436 | -1.025808 |
| C | 0.715218  | 0.049721  | -4.916219 |
| C | -0.704156 | -0.109469 | 4.915503  |
| H | -3.529644 | -0.033513 | 0.742280  |
| H | -3.122797 | 0.009892  | -1.719875 |
| H | 1.191179  | 0.991659  | -5.199422 |
| H | 3.073527  | -0.064102 | 1.713637  |
| H | 3.484047  | -0.014169 | -0.750670 |
| H | -1.767379 | -0.038656 | 5.128802  |
| H | -0.171331 | 0.726241  | 5.373159  |
| H | -0.300481 | -1.043016 | 5.313128  |
| H | -0.246768 | -0.043473 | -5.413347 |
| H | 1.372668  | -0.774025 | -5.197062 |
| N | 0.482183  | 0.016015  | -3.475681 |
| N | -0.533431 | -0.068831 | 3.466453  |
| O | -1.772908 | 0.198000  | -3.798957 |
| O | -2.799745 | -0.009459 | 3.151027  |
| O | 2.736452  | -0.020028 | -3.176666 |
| O | 1.705308  | -0.241661 | 3.801600  |

---

NDI<sup>-</sup>-CBPQT<sup>3+</sup>

| Atom | X         | Y         | Z         |
|------|-----------|-----------|-----------|
| N    | -4.463161 | -2.278343 | 1.190983  |
| N    | 4.360235  | 2.390968  | -0.963724 |

|   |           |           |           |
|---|-----------|-----------|-----------|
| N | 2.601842  | -3.204891 | 0.775131  |
| N | -2.622688 | 3.412165  | -0.991712 |
| C | -5.787660 | -1.645726 | 1.048233  |
| C | 5.764100  | 1.844010  | -0.862215 |
| C | -3.634416 | -1.934171 | 2.232768  |
| C | 3.671845  | 2.267186  | -2.116058 |
| C | -2.312701 | -2.248903 | 2.260802  |
| C | 2.332224  | 2.597005  | -2.193741 |
| C | -1.654397 | -2.928545 | 1.169360  |
| C | 1.650427  | 3.058635  | -1.061751 |
| C | -2.594266 | -3.374590 | 0.156883  |
| C | 2.413104  | 3.255525  | 0.094257  |
| C | -3.901910 | -3.018158 | 0.168757  |
| C | 3.751889  | 2.908718  | 0.122144  |
| C | -0.262905 | -3.083279 | 1.074644  |
| C | 0.165134  | 3.236443  | -1.060281 |
| C | 0.670997  | -2.609484 | 2.072739  |
| C | -0.639547 | 2.530844  | -1.962923 |
| C | 2.016406  | -2.676532 | 1.907848  |
| C | -2.015188 | 2.628713  | -1.904069 |
| C | 1.755799  | -3.725736 | -0.178679 |
| C | -1.876157 | 4.116415  | -0.117168 |
| C | 0.403549  | -3.679289 | -0.067336 |
| C | -0.494905 | 4.046965  | -0.129524 |
| C | 4.066160  | -3.413063 | 0.715107  |
| C | -4.127193 | 3.514959  | -0.985495 |
| C | 4.850909  | -2.173099 | 0.315367  |
| C | -4.805299 | 2.263259  | -0.471274 |
| C | 5.288076  | -1.253718 | 1.270284  |
| C | -5.263020 | 1.274412  | -1.346665 |
| C | 5.718119  | 0.017282  | 0.888052  |
| C | -5.698958 | 0.043137  | -0.857084 |

|   |           |           |           |
|---|-----------|-----------|-----------|
| C | 5.722727  | 0.383477  | -0.459402 |
| C | -5.680399 | -0.223823 | 0.514455  |
| C | 5.491189  | -0.607703 | -1.421468 |
| C | -5.389776 | 0.829731  | 1.388748  |
| C | 5.064798  | -1.873415 | -1.034830 |
| C | -4.953529 | 2.057244  | 0.903637  |
| H | -6.267704 | -1.654413 | 2.030601  |
| H | 6.224746  | 1.996854  | -1.838841 |
| H | -6.382097 | -2.273681 | 0.380987  |
| H | 6.286146  | 2.462440  | -0.131944 |
| H | -4.103114 | -1.396956 | 3.049342  |
| H | 4.211315  | 1.875298  | -2.967957 |
| H | -1.758579 | -1.925214 | 3.133662  |
| H | 1.842155  | 2.468503  | -3.150086 |
| H | -2.262562 | -3.972098 | -0.684446 |
| H | 1.975180  | 3.619111  | 1.015460  |
| H | -4.579772 | -3.309822 | -0.624045 |
| H | 4.342272  | 2.990600  | 1.024263  |
| H | 0.319473  | -2.158723 | 2.993515  |
| H | -0.218746 | 1.863937  | -2.703920 |
| H | 2.703016  | -2.306292 | 2.659972  |
| H | -2.657261 | 2.077700  | -2.579153 |
| H | 2.237666  | -4.157869 | -1.047748 |
| H | -2.408176 | 4.740637  | 0.588229  |
| H | -0.164261 | -4.103743 | -0.886828 |
| H | 0.041934  | 4.648576  | 0.592879  |
| H | 4.244575  | -4.221207 | 0.002515  |
| H | -4.366553 | 4.382868  | -0.371099 |
| H | 4.388917  | -3.768193 | 1.698074  |
| H | -4.414695 | 3.738744  | -2.014004 |
| H | 5.201206  | -1.483269 | 2.327964  |
| H | -5.224196 | 1.432606  | -2.420563 |



|   |           |           |           |
|---|-----------|-----------|-----------|
| H | 5.942748  | 0.752225  | 1.653628  |
| H | -5.961007 | -0.741232 | -1.559383 |
| H | 5.570491  | -0.373895 | -2.479641 |
| H | -5.440570 | 0.672708  | 2.462671  |
| H | 4.812751  | -2.605006 | -1.797447 |
| H | -4.672632 | 2.836960  | 1.606072  |
| C | -0.717598 | 0.694242  | 1.472495  |
| C | 0.237647  | 0.216875  | 0.556009  |
| C | -2.062034 | 0.605813  | 1.173877  |
| C | -0.291163 | 1.250474  | 2.761720  |
| C | -0.180379 | -0.366970 | -0.663916 |
| C | 1.605803  | 0.285864  | 0.844438  |
| C | -1.555223 | -0.483537 | -0.921224 |
| C | 0.767912  | -0.833668 | -1.588674 |
| C | -2.472997 | 0.018793  | -0.022976 |
| C | -2.017702 | -1.145879 | -2.153284 |
| C | 2.065508  | 0.837460  | 2.123554  |
| C | 2.523411  | -0.109694 | -0.121126 |
| C | 0.340570  | -1.520109 | -2.814593 |
| C | 2.119209  | -0.649200 | -1.328588 |
| C | -1.519411 | -2.371769 | -4.182505 |
| C | 1.492265  | 1.801468  | 4.310500  |
| H | 3.563811  | 0.012686  | 0.102893  |
| H | 2.842461  | -0.972191 | -2.065349 |
| H | -2.219652 | -3.152231 | -3.880742 |
| H | -2.784429 | 0.977590  | 1.886723  |
| H | -3.514990 | -0.100154 | -0.249962 |
| H | 2.562338  | 1.644008  | 4.414970  |
| H | 0.952969  | 1.291522  | 5.109887  |
| H | 1.267391  | 2.869633  | 4.358712  |
| H | -0.658640 | -2.807306 | -4.683013 |
| H | -2.031367 | -1.679385 | -4.854767 |

|   |           |           |           |
|---|-----------|-----------|-----------|
| N | -1.041010 | -1.665405 | -2.997877 |
| N | 1.078847  | 1.257383  | 3.020094  |
| O | 1.131556  | -1.952929 | -3.642614 |
| O | 3.253198  | 0.966389  | 2.404788  |
| O | -3.201360 | -1.270339 | -2.436802 |
| O | -1.074853 | 1.683014  | 3.597722  |

NDI<sup>•-</sup>-CBPQT<sup>2(•+)</sup>(T)

| Atom | X         | Y         | Z         |
|------|-----------|-----------|-----------|
| N    | 4.180485  | 2.778714  | -0.634716 |
| N    | -4.181922 | -2.802018 | -0.513370 |
| N    | -2.895303 | 3.311130  | -0.528168 |
| N    | 2.893588  | -3.331659 | -0.380961 |
| C    | 5.574837  | 2.281390  | -0.648218 |
| C    | -5.576175 | -2.305568 | -0.548706 |
| C    | 3.521587  | 2.994329  | 0.543195  |
| C    | -3.463085 | -2.922820 | -1.670638 |
| C    | 2.179939  | 3.228534  | 0.590630  |
| C    | -2.124124 | -3.160006 | -1.669082 |
| C    | 1.374321  | 3.218182  | -0.591749 |
| C    | -1.376152 | -3.240683 | -0.450768 |
| C    | 2.122637  | 3.084493  | -1.805276 |
| C    | -2.181762 | -3.197623 | 0.730855  |
| C    | 3.461811  | 2.848822  | -1.796225 |
| C    | -3.523293 | -2.965265 | 0.672886  |
| C    | -0.050961 | 3.278681  | -0.566597 |
| C    | 0.049069  | -3.301304 | -0.422355 |
| C    | -0.814037 | 3.313501  | 0.644674  |
| C    | 0.846172  | -3.336192 | -1.609583 |
| C    | -2.176930 | 3.320992  | 0.634341  |
| C    | 2.208018  | -3.348001 | -1.561192 |
| C    | -2.209330 | 3.263315  | -1.707134 |

|   |           |           |           |
|---|-----------|-----------|-----------|
| C | 2.174584  | -3.280756 | 0.780200  |
| C | -0.847496 | 3.249645  | -1.754223 |
| C | 0.811717  | -3.272611 | 0.789399  |
| C | -4.377573 | 3.336284  | -0.518175 |
| C | 4.375831  | -3.354231 | -0.367786 |
| C | -4.985132 | 1.949366  | -0.556629 |
| C | 4.982345  | -1.969804 | -0.469586 |
| C | -5.388694 | 1.307084  | 0.616272  |
| C | 5.044301  | -1.319235 | -1.702479 |
| C | -5.694486 | -0.051840 | 0.607731  |
| C | 5.348152  | 0.034966  | -1.771111 |
| C | -5.600714 | -0.789746 | -0.574951 |
| C | 5.599115  | 0.765687  | -0.608291 |
| C | -5.355051 | -0.109938 | -1.769205 |
| C | 5.696783  | 0.079733  | 0.604848  |
| C | -5.051167 | 1.245985  | -1.760065 |
| C | 5.389965  | -1.277357 | 0.673024  |
| H | 6.086524  | 2.715396  | 0.213126  |
| H | -6.049748 | -2.731794 | -1.435872 |
| H | 6.048481  | 2.668834  | -1.553000 |
| H | -6.087830 | -2.701266 | 0.330925  |
| H | 4.126980  | 2.951563  | 1.440163  |
| H | -4.020566 | -2.809482 | -2.591228 |
| H | 1.742953  | 3.374509  | 1.569960  |
| H | -1.642340 | -3.228718 | -2.635540 |
| H | 1.641609  | 3.113522  | -2.774108 |
| H | -1.744875 | -3.301663 | 1.715579  |
| H | 4.019660  | 2.697022  | -2.710997 |
| H | -4.128803 | -2.882903 | 1.566868  |
| H | -0.333954 | 3.302629  | 1.614539  |
| H | 0.395411  | -3.351731 | -2.593270 |
| H | -2.755193 | 3.327184  | 1.549659  |

|   |           |           |           |
|---|-----------|-----------|-----------|
| H | 2.808107  | -3.374932 | -2.461364 |
| H | -2.809021 | 3.241519  | -2.607704 |
| H | 2.752400  | -3.238716 | 1.694876  |
| H | -0.396505 | 3.207602  | -2.736933 |
| H | 0.331404  | -3.209208 | 1.757098  |
| H | -4.689337 | 3.928395  | -1.381706 |
| H | 4.680006  | -3.851231 | 0.555304  |
| H | -4.682442 | 3.876633  | 0.379982  |
| H | 4.689834  | -3.986065 | -1.201771 |
| H | -5.395217 | 1.849234  | 1.557975  |
| H | 4.782106  | -1.847784 | -2.613653 |
| H | -5.932917 | -0.552352 | 1.542425  |
| H | 5.308998  | 0.537320  | -2.732584 |
| H | -5.320736 | -0.652836 | -2.708640 |
| H | 5.939401  | 0.619285  | 1.516476  |
| H | -4.793646 | 1.735843  | -2.693944 |
| H | 5.399475  | -1.778938 | 1.636767  |
| C | 1.227925  | 0.028700  | 2.363178  |
| C | -0.000663 | 0.038881  | 1.670551  |
| C | 2.434340  | 0.006174  | 1.646255  |
| C | 1.237597  | 0.058830  | 3.816816  |
| C | 0.000892  | 0.003998  | 0.244056  |
| C | -1.230401 | 0.082357  | 2.360980  |
| C | 1.224687  | -0.030929 | -0.445091 |
| C | -1.220718 | 0.007692  | -0.451232 |
| C | 2.424920  | -0.018938 | 0.268732  |
| C | 1.242218  | -0.066825 | -1.899595 |
| C | -1.252136 | 0.122278  | 3.814595  |
| C | -2.434470 | 0.072876  | 1.638478  |
| C | -1.243228 | -0.030296 | -1.906205 |
| C | -2.422170 | 0.034775  | 0.261675  |
| C | 0.039252  | -0.126850 | -3.997680 |

|   |           |           |           |
|---|-----------|-----------|-----------|
| C | 0.025855  | 0.144996  | 5.913421  |
| H | -3.369889 | 0.088947  | 2.185416  |
| H | -3.333508 | 0.003144  | -0.308335 |
| H | 0.527853  | 0.766343  | -4.395440 |
| H | 3.368572  | 0.016966  | 2.195835  |
| H | 3.336933  | -0.008822 | -0.300959 |
| H | -0.999763 | 0.211921  | 6.267418  |
| H | 0.600323  | 1.009758  | 6.252688  |
| H | 0.499536  | -0.759081 | 6.303455  |
| H | -0.985205 | -0.182859 | -4.356307 |
| H | 0.604585  | -1.003058 | -4.323045 |
| N | 0.002914  | -0.075397 | -2.542875 |
| N | -0.005188 | 0.107997  | 4.456401  |
| O | -2.278831 | -0.033179 | -2.573822 |
| O | -2.293528 | 0.165106  | 4.475911  |
| O | 2.268666  | -0.086352 | -2.580873 |
| O | 2.266795  | 0.046190  | 4.498023  |

NDI<sup>•-</sup>-CBPQT<sup>2(•+)</sup>(S)

| Atom | X         | Y         | Z         |
|------|-----------|-----------|-----------|
| N    | 2.892563  | 3.350681  | 1.515394  |
| N    | -3.119190 | -3.547557 | -1.008711 |
| N    | -3.777324 | 2.630298  | -0.805005 |
| N    | 3.572519  | -2.827947 | 1.251135  |
| C    | 4.290801  | 3.256611  | 1.995082  |
| C    | -4.528899 | -3.458442 | -1.454837 |
| C    | 1.849954  | 3.227554  | 2.389816  |
| C    | -2.088626 | -3.477391 | -1.903936 |
| C    | 0.554826  | 3.198248  | 1.972197  |
| C    | -0.784881 | -3.446551 | -1.507849 |
| C    | 0.208740  | 3.260384  | 0.584588  |
| C    | -0.419830 | -3.452337 | -0.124509 |

|   |           |           |           |
|---|-----------|-----------|-----------|
| C | 1.328945  | 3.431236  | -0.288953 |
| C | -1.529633 | -3.566251 | 0.771601  |
| C | 2.607187  | 3.456452  | 0.183048  |
| C | -2.814321 | -3.594450 | 0.322413  |
| C | -1.131537 | 3.110162  | 0.117079  |
| C | 0.925144  | -3.302724 | 0.330417  |
| C | -2.235721 | 2.886711  | 0.999235  |
| C | 2.034661  | -3.119741 | -0.553900 |
| C | -3.490960 | 2.646361  | 0.530425  |
| C | 3.291575  | -2.878996 | -0.085664 |
| C | -2.759088 | 2.867366  | -1.684993 |
| C | 2.547494  | -3.026813 | 2.132573  |
| C | -1.484293 | 3.113487  | -1.269673 |
| C | 1.273634  | -3.269939 | 1.718254  |
| C | -5.134407 | 2.268591  | -1.277494 |
| C | 4.924311  | -2.466817 | 1.737168  |
| C | -5.301894 | 0.767451  | -1.398219 |
| C | 5.063268  | -0.971244 | 1.936937  |
| C | -5.522223 | -0.003841 | -0.255912 |
| C | 5.595535  | -0.154691 | 0.936156  |
| C | -5.376399 | -1.385022 | -0.298723 |
| C | 5.443313  | 1.228630  | 0.999646  |
| C | -5.009542 | -2.021948 | -1.484941 |
| C | 4.756125  | 1.816222  | 2.064498  |
| C | -4.954409 | -1.268870 | -2.660327 |
| C | 4.372814  | 1.010946  | 3.138388  |
| C | -5.099668 | 0.115820  | -2.617255 |
| C | 4.525017  | -0.368627 | 3.075133  |
| H | 4.326426  | 3.736282  | 2.975746  |
| H | -4.587965 | -3.920170 | -2.442403 |
| H | 4.909180  | 3.844709  | 1.314240  |
| H | -5.122862 | -4.064399 | -0.767005 |

|   |           |           |           |
|---|-----------|-----------|-----------|
| H | 2.112081  | 3.151686  | 3.437086  |
| H | -2.369279 | -3.434849 | -2.948837 |
| H | -0.200143 | 3.094778  | 2.740611  |
| H | -0.039258 | -3.375898 | -2.289069 |
| H | 1.202707  | 3.507421  | -1.360961 |
| H | -1.389657 | -3.601659 | 1.844032  |
| H | 3.458978  | 3.548666  | -0.479011 |
| H | -3.654305 | -3.651577 | 1.002175  |
| H | -2.107440 | 2.870393  | 2.073547  |
| H | 1.907010  | -3.124348 | -1.628491 |
| H | -4.320500 | 2.454130  | 1.197994  |
| H | 4.126184  | -2.707207 | -0.753352 |
| H | -3.021382 | 2.836629  | -2.734999 |
| H | 2.804990  | -2.977756 | 3.182501  |
| H | -0.742171 | 3.272500  | -2.041249 |
| H | 0.530432  | -3.410695 | 2.492297  |
| H | -5.286659 | 2.764776  | -2.237824 |
| H | 5.084363  | -3.009481 | 2.671522  |
| H | -5.845627 | 2.693175  | -0.565184 |
| H | 5.644247  | -2.841038 | 1.006532  |
| H | -5.729497 | 0.476316  | 0.695268  |
| H | 6.065861  | -0.600155 | 0.063725  |
| H | -5.471355 | -1.955088 | 0.620127  |
| H | 5.797037  | 1.843089  | 0.176014  |
| H | -4.723306 | -1.753671 | -3.604958 |
| H | 3.881848  | 1.449857  | 4.001219  |
| H | -4.980049 | 0.693451  | -3.529802 |
| H | 4.149842  | -0.979447 | 3.890311  |
| C | 1.057973  | 0.029532  | 0.573525  |
| C | 0.124819  | -0.051038 | -0.473915 |
| C | 2.411814  | 0.215883  | 0.286083  |
| C | 0.614537  | -0.076713 | 1.954277  |

|   |           |           |           |
|---|-----------|-----------|-----------|
| C | 0.575484  | 0.053256  | -1.824520 |
| C | -1.244131 | -0.232407 | -0.212015 |
| C | 1.950210  | 0.238042  | -2.082177 |
| C | -0.362091 | -0.028518 | -2.876205 |
| C | 2.857388  | 0.318386  | -1.013500 |
| C | 2.419653  | 0.346307  | -3.453079 |
| C | -1.726202 | -0.341279 | 1.156092  |
| C | -2.147771 | -0.306129 | -1.275486 |
| C | 0.078026  | 0.074964  | -4.257885 |
| C | -1.724022 | -0.208867 | -2.581955 |
| C | 1.945268  | 0.374580  | -5.828330 |
| C | -1.181382 | -0.363725 | 3.549816  |
| H | -3.184908 | -0.445321 | -1.030826 |
| H | -2.431707 | -0.268332 | -3.400613 |
| H | 2.447593  | 1.334933  | -5.964949 |
| H | 3.087487  | 0.276648  | 1.119902  |
| H | 3.908805  | 0.465358  | -1.231130 |
| H | -2.259669 | -0.499424 | 3.558858  |
| H | -0.910470 | 0.544155  | 4.094188  |
| H | -0.690158 | -1.214093 | 4.028900  |
| H | 1.093043  | 0.298830  | -6.498737 |
| H | 2.661652  | -0.422809 | -6.039205 |
| N | 1.453578  | 0.259025  | -4.460859 |
| N | -0.754719 | -0.258651 | 2.161383  |
| O | -0.691870 | 0.008966  | -5.221070 |
| O | -2.911600 | -0.498536 | 1.454009  |
| O | 3.603721  | 0.508194  | -3.763873 |
| O | 1.362740  | -0.017360 | 2.931541  |

NDI<sup>•-</sup>-CBPQT<sup>•+</sup>

| Atom | X        | Y        | Z        |
|------|----------|----------|----------|
| N    | 4.283072 | 2.781458 | 0.529479 |



|   |           |           |           |
|---|-----------|-----------|-----------|
| N | -4.245001 | -2.689263 | -0.569462 |
| N | -2.853806 | 3.164975  | 1.065271  |
| N | 2.837512  | -3.132515 | -1.082171 |
| C | 5.634636  | 2.277265  | 0.270009  |
| C | -5.637528 | -2.232313 | -0.327544 |
| C | 3.630066  | 2.507741  | 1.725347  |
| C | -3.598719 | -2.364806 | -1.730658 |
| C | 2.310849  | 2.718719  | 1.908279  |
| C | -2.265637 | -2.585267 | -1.904472 |
| C | 1.425404  | 3.187334  | 0.835830  |
| C | -1.440901 | -3.119165 | -0.861481 |
| C | 2.195435  | 3.606885  | -0.340289 |
| C | -2.178646 | -3.530371 | 0.294533  |
| C | 3.518692  | 3.375650  | -0.466872 |
| C | -3.517555 | -3.297468 | 0.414969  |
| C | 0.051408  | 3.196037  | 0.911640  |
| C | -0.014447 | -3.162097 | -0.943251 |
| C | -0.711595 | 2.751108  | 2.081678  |
| C | 0.711619  | -2.708226 | -2.092009 |
| C | -2.059762 | 2.742979  | 2.121337  |
| C | 2.073244  | -2.703104 | -2.130290 |
| C | -2.187313 | 3.574665  | -0.079026 |
| C | 2.189967  | -3.565015 | 0.040525  |
| C | -0.839786 | 3.609457  | -0.177265 |
| C | 0.827859  | -3.598825 | 0.129589  |
| C | -4.316816 | 3.180850  | 1.169264  |
| C | 4.320880  | -3.153488 | -1.184449 |
| C | -4.990305 | 1.852583  | 0.847900  |
| C | 4.977158  | -1.820657 | -0.879173 |
| C | -5.094972 | 0.850291  | 1.818630  |
| C | 5.052170  | -0.821434 | -1.854926 |
| C | -5.430731 | -0.452600 | 1.465212  |

|   |           |           |           |
|---|-----------|-----------|-----------|
| C | 5.388687  | 0.482849  | -1.509298 |
| C | -5.674492 | -0.783681 | 0.127747  |
| C | 5.657468  | 0.821067  | -0.178846 |
| C | -5.762819 | 0.253424  | -0.802986 |
| C | 5.774646  | -0.215806 | 0.749560  |
| C | -5.424608 | 1.558224  | -0.445261 |
| C | 5.432332  | -1.523286 | 0.405654  |
| H | 6.218480  | 2.396751  | 1.188663  |
| H | -6.188460 | -2.369576 | -1.260830 |
| H | 6.084541  | 2.921251  | -0.491906 |
| H | -6.066953 | -2.903020 | 0.419703  |
| H | 4.263300  | 2.117932  | 2.515500  |
| H | -4.200171 | -1.884994 | -2.492049 |
| H | 1.912225  | 2.494946  | 2.891924  |
| H | -1.844057 | -2.272383 | -2.850990 |
| H | 1.703412  | 4.098830  | -1.172662 |
| H | -1.689627 | -3.998445 | 1.139661  |
| H | 4.066458  | 3.659957  | -1.359843 |
| H | -4.063835 | -3.568431 | 1.310079  |
| H | -0.198595 | 2.373435  | 2.959077  |
| H | 0.202158  | -2.331644 | -2.969386 |
| H | -2.599706 | 2.390657  | 2.993233  |
| H | 2.614451  | -2.351174 | -2.999145 |
| H | -2.825888 | 3.861736  | -0.907810 |
| H | 2.822457  | -3.872522 | 0.863938  |
| H | -0.428945 | 3.926424  | -1.129730 |
| H | 0.411006  | -3.942245 | 1.068086  |
| H | -4.684905 | 3.957871  | 0.492970  |
| H | 4.670824  | -3.924478 | -0.495233 |
| H | -4.572122 | 3.492051  | 2.187816  |
| H | 4.557609  | -3.485036 | -2.198588 |
| H | -4.834955 | 1.068369  | 2.851313  |

|   |           |           |           |
|---|-----------|-----------|-----------|
| H | 4.776204  | -1.042452 | -2.882937 |
| H | -5.421687 | -1.230873 | 2.224242  |
| H | 5.359286  | 1.260292  | -2.268695 |
| H | -5.991230 | 0.032251  | -1.841273 |
| H | 6.024769  | 0.009947  | 1.782235  |
| H | -5.401362 | 2.326266  | -1.212295 |
| H | 5.424837  | -2.288433 | 1.175201  |
| C | -1.558399 | 0.370805  | -0.880773 |
| C | -0.194139 | 0.259807  | -0.586393 |
| C | -2.506338 | -0.022075 | 0.066574  |
| C | -1.986155 | 0.856105  | -2.180397 |
| C | 0.198222  | -0.282567 | 0.673805  |
| C | 0.779429  | 0.662199  | -1.517682 |
| C | -0.780530 | -0.693833 | 1.595142  |
| C | 1.564369  | -0.410278 | 0.966493  |
| C | -2.135384 | -0.537949 | 1.283743  |
| C | -0.389484 | -1.288553 | 2.857599  |
| C | 0.392287  | 1.210629  | -2.800798 |
| C | 2.133391  | 0.544130  | -1.184767 |
| C | 1.996763  | -0.982369 | 2.226887  |
| C | 2.508149  | 0.027082  | 0.029201  |
| C | 1.358455  | -2.024335 | 4.361409  |
| C | -1.431907 | 1.786319  | -4.345685 |
| H | 2.873394  | 0.887171  | -1.893579 |
| H | 3.540751  | -0.028330 | 0.309006  |
| H | 1.028579  | -1.405156 | 5.200022  |
| H | -3.536885 | 0.066478  | -0.210261 |
| H | -2.876125 | -0.850704 | 2.007967  |
| H | -0.551118 | 2.078178  | -4.912203 |
| H | -2.085874 | 2.648785  | -4.194700 |
| H | -1.992774 | 1.020743  | -4.887481 |
| H | 2.441171  | -2.120332 | 4.373829  |

|   |           |           |           |
|---|-----------|-----------|-----------|
| H | 0.887903  | -3.005601 | 4.453763  |
| N | 0.979244  | -1.409720 | 3.097078  |
| N | -0.984183 | 1.267826  | -3.061071 |
| O | 3.179910  | -1.120176 | 2.557037  |
| O | 1.201248  | 1.604762  | -3.650538 |
| O | -1.191133 | -1.693420 | 3.709335  |
| O | -3.164287 | 0.908630  | -2.550118 |

# NDI<sup>2-</sup>-CBPQT<sup>0</sup>

| Atom | X         | Y         | Z         |
|------|-----------|-----------|-----------|
| N    | -4.542047 | -2.665451 | -0.627053 |
| N    | 4.543278  | 2.669318  | -0.613896 |
| N    | 2.566325  | -3.499114 | -0.514264 |
| N    | -2.564714 | 3.497924  | -0.488100 |
| C    | -5.814200 | -1.940072 | -0.637356 |
| C    | 5.814681  | 1.942808  | -0.630124 |
| C    | -3.858462 | -2.891694 | 0.561615  |
| C    | 3.805328  | 2.823078  | -1.781968 |
| C    | -2.547182 | -3.198955 | 0.609207  |
| C    | 2.494964  | 3.133426  | -1.791749 |
| C    | -1.699340 | -3.237684 | -0.585511 |
| C    | 1.701363  | 3.243877  | -0.565510 |
| C    | -2.494532 | -3.120442 | -1.810133 |
| C    | 2.550925  | 3.199314  | 0.627842  |
| C    | -3.805328 | -2.811797 | -1.796934 |
| C    | 3.861840  | 2.890829  | 0.576826  |
| C    | -0.326980 | -3.322543 | -0.560878 |
| C    | 0.328956  | 3.326851  | -0.538856 |
| C    | 0.478346  | -3.326163 | 0.663351  |
| C    | -0.513144 | 3.380880  | -1.735572 |
| C    | 1.826027  | -3.392735 | 0.652286  |
| C    | -1.859241 | 3.462506  | -1.678963 |

|   |           |           |           |
|---|-----------|-----------|-----------|
| C | 1.859447  | -3.457350 | -1.704133 |
| C | -1.822714 | 3.388602  | 0.677182  |
| C | 0.513507  | -3.373094 | -1.758756 |
| C | -0.474946 | 3.324012  | 0.686311  |
| C | 4.028419  | -3.580563 | -0.495634 |
| C | -4.026723 | 3.581209  | -0.467017 |
| C | 4.740118  | -2.238452 | -0.556523 |
| C | -4.740031 | 2.240354  | -0.536418 |
| C | 5.236210  | -1.623257 | 0.595678  |
| C | -4.837932 | 1.558019  | -1.749768 |
| C | 5.683174  | -0.303378 | 0.561981  |
| C | -5.281938 | 0.242257  | -1.792631 |
| C | 5.642016  | 0.432187  | -0.625863 |
| C | -5.642724 | -0.429389 | -0.623180 |
| C | 5.282916  | -0.232452 | -1.799881 |
| C | -5.685488 | 0.298959  | 0.569121  |
| C | 4.839279  | -1.548670 | -1.765610 |
| C | -5.238185 | 1.618543  | 0.611418  |
| H | -6.390756 | -2.267521 | 0.233766  |
| H | 6.363420  | 2.261719  | -1.522802 |
| H | -6.363364 | -2.253544 | -1.531699 |
| H | 6.392281  | 2.263858  | 0.242701  |
| H | -4.464246 | -2.823384 | 1.459778  |
| H | 4.369751  | 2.701375  | -2.700711 |
| H | -2.121934 | -3.388285 | 1.588937  |
| H | 2.029289  | 3.261460  | -2.762832 |
| H | -2.030039 | -3.243185 | -2.782533 |
| H | 2.127366  | 3.384795  | 1.609055  |
| H | -4.371044 | -2.685854 | -2.714304 |
| H | 4.468937  | 2.817825  | 1.473731  |
| H | 0.002231  | -3.214445 | 1.630755  |
| H | -0.066436 | 3.347730  | -2.723107 |

|   |           |           |           |
|---|-----------|-----------|-----------|
| H | 2.407478  | -3.353994 | 1.566727  |
| H | -2.464627 | 3.502171  | -2.577689 |
| H | 2.463876  | -3.494798 | -2.603636 |
| H | -2.402948 | 3.345538  | 1.592186  |
| H | 0.065439  | -3.334340 | -2.745466 |
| H | 0.002580  | 3.209462  | 1.652706  |
| H | 4.330463  | -4.204107 | -1.343835 |
| H | -4.313185 | 4.111101  | 0.446661  |
| H | 4.316791  | -4.116457 | 0.413966  |
| H | -4.329200 | 4.211033  | -1.310409 |
| H | 5.210206  | -2.154444 | 1.544178  |
| H | -4.492832 | 2.029955  | -2.664736 |
| H | 5.997225  | 0.179592  | 1.484411  |
| H | -5.270522 | -0.290792 | -2.738739 |
| H | 5.272850  | 0.306313  | -2.742802 |
| H | -6.000756 | -0.189534 | 1.488227  |
| H | 4.496010  | -2.015491 | -2.683933 |
| H | -5.213101 | 2.144020  | 1.563111  |
| C | -1.226095 | 0.045242  | 2.448135  |
| C | 0.002493  | -0.005467 | 1.753525  |
| C | -2.434097 | 0.074510  | 1.726366  |
| C | -1.234037 | 0.045250  | 3.895174  |
| C | -0.001081 | -0.000213 | 0.325868  |
| C | 1.234338  | -0.060585 | 2.443852  |
| C | -1.224857 | 0.040153  | -0.362533 |
| C | 1.218644  | -0.035677 | -0.371843 |
| C | -2.423871 | 0.058690  | 0.350549  |
| C | -1.243355 | 0.058416  | -1.816765 |
| C | 1.258316  | -0.073533 | 3.890514  |
| C | 2.437941  | -0.082725 | 1.712637  |
| C | 1.238113  | -0.042255 | -1.826474 |
| C | 2.420805  | -0.057830 | 0.337479  |

|   |           |           |           |
|---|-----------|-----------|-----------|
| C | -0.046440 | 0.021903  | -3.913408 |
| C | -0.018937 | -0.028829 | 5.989283  |
| H | 3.378377  | -0.094999 | 2.252119  |
| H | 3.331090  | -0.028535 | -0.234264 |
| H | -0.640319 | -0.819292 | -4.280110 |
| H | -3.371432 | 0.084569  | 2.271725  |
| H | -3.336328 | 0.033737  | -0.217683 |
| H | 1.005705  | -0.114106 | 6.342549  |
| H | -0.614240 | -0.872143 | 6.347468  |
| H | -0.470903 | 0.892347  | 6.366321  |
| H | 0.975837  | -0.053505 | -4.275376 |
| H | -0.505675 | 0.947567  | -4.271786 |
| N | -0.007402 | 0.010323  | -2.461259 |
| N | 0.010424  | -0.019440 | 4.533364  |
| O | 2.266045  | -0.092870 | -2.503987 |
| O | 2.299780  | -0.126360 | 4.562631  |
| O | -2.263708 | 0.115303  | -2.505018 |
| O | -2.261142 | 0.094581  | 4.588697  |

BTA<sup>•</sup>-CBPQT<sup>4+</sup>

| Atom | X         | Y         | Z         |
|------|-----------|-----------|-----------|
| N    | 3.048027  | 3.527939  | 1.270297  |
| N    | -2.770761 | -3.510630 | -1.531633 |
| N    | -3.441437 | 2.873551  | -1.299257 |
| N    | 3.742441  | -2.812222 | 0.978061  |
| C    | 4.446556  | 3.364324  | 1.783446  |
| C    | -4.174945 | -3.332581 | -2.018332 |
| C    | 2.018395  | 3.183605  | 2.065616  |
| C    | -1.740884 | -3.364857 | -2.387516 |
| C    | 0.724749  | 3.180406  | 1.592658  |
| C    | -0.437458 | -3.353414 | -1.934284 |
| C    | 0.461803  | 3.534524  | 0.266175  |

|   |           |           |           |
|---|-----------|-----------|-----------|
| C | -0.169187 | -3.502835 | -0.569425 |
| C | 1.544243  | 3.948744  | -0.517685 |
| C | -1.256180 | -3.743355 | 0.278456  |
| C | 2.822665  | 3.931434  | 0.004640  |
| C | -2.540427 | -3.729469 | -0.222595 |
| C | -0.911148 | 3.396185  | -0.292129 |
| C | 1.208287  | -3.341419 | -0.026779 |
| C | -2.035079 | 3.385138  | 0.540594  |
| C | 2.346378  | -3.455574 | -0.832395 |
| C | -3.281006 | 3.112791  | 0.016852  |
| C | 3.595431  | -3.181853 | -0.309468 |
| C | -2.389742 | 2.949890  | -2.137717 |
| C | 2.670423  | -2.745557 | 1.789196  |
| C | -1.120284 | 3.205042  | -1.662067 |
| C | 1.403260  | -3.002958 | 1.315545  |
| C | -4.774893 | 2.436493  | -1.820344 |
| C | 5.081037  | -2.389331 | 1.505100  |
| C | -4.815846 | 0.927459  | -1.921479 |
| C | 5.117999  | -0.884967 | 1.655623  |
| C | -5.091117 | 0.149595  | -0.792370 |
| C | 5.559801  | -0.075643 | 0.607154  |
| C | -4.948181 | -1.233945 | -0.840426 |
| C | 5.407977  | 1.306231  | 0.673792  |
| C | -4.528559 | -1.860951 | -2.017836 |
| C | 4.812576  | 1.896736  | 1.790222  |
| C | -4.355353 | -1.093753 | -3.170860 |
| C | 4.470113  | 1.095468  | 2.881305  |
| C | -4.498759 | 0.292308  | -3.122881 |
| C | 4.622881  | -0.284466 | 2.814886  |
| H | 4.469568  | 3.803518  | 2.781435  |
| H | -4.228146 | -3.768602 | -3.015913 |
| H | 5.096071  | 3.951643  | 1.135239  |



|   |           |           |           |
|---|-----------|-----------|-----------|
| H | -4.817588 | -3.913195 | -1.356358 |
| H | 2.254362  | 2.887870  | 3.078519  |
| H | -1.986204 | -3.229650 | -3.432777 |
| H | -0.050355 | 2.855003  | 2.274372  |
| H | 0.344022  | -3.188681 | -2.665471 |
| H | 1.422815  | 4.285090  | -1.539209 |
| H | -1.135539 | -3.931933 | 1.336873  |
| H | 3.685618  | 4.223022  | -0.579224 |
| H | -3.405822 | -3.874385 | 0.409774  |
| H | -1.969829 | 3.578751  | 1.603161  |
| H | 2.292402  | -3.752713 | -1.871658 |
| H | -4.167480 | 3.069831  | 0.635259  |
| H | 4.494298  | -3.239058 | -0.908908 |
| H | -2.584321 | 2.774844  | -3.187924 |
| H | 2.845437  | -2.462765 | 2.817816  |
| H | -0.308493 | 3.213658  | -2.378262 |
| H | 0.583839  | -2.895502 | 2.014240  |
| H | -4.915648 | 2.918045  | -2.788101 |
| H | 5.223999  | -2.905060 | 2.455348  |
| H | -5.525995 | 2.823661  | -1.132467 |
| H | 5.828837  | -2.752228 | 0.800816  |
| H | -5.392768 | 0.620383  | 0.138578  |
| H | 5.990670  | -0.521461 | -0.284131 |
| H | -5.139894 | -1.817723 | 0.055074  |
| H | 5.724603  | 1.916845  | -0.166366 |
| H | -4.089966 | -1.567558 | -4.111045 |
| H | 4.071229  | 1.538172  | 3.788785  |
| H | -4.344804 | 0.872679  | -4.027669 |
| H | 4.342462  | -0.886881 | 3.673773  |
| S | -0.426473 | -0.122448 | 2.888574  |
| S | -2.127905 | -0.258994 | 1.618346  |
| N | 1.142560  | 0.139642  | -0.599560 |

|   |           |           |           |
|---|-----------|-----------|-----------|
| N | 0.727916  | 0.041435  | 1.692950  |
| C | -1.599750 | -0.181025 | -1.108588 |
| C | 2.567556  | 0.308117  | -0.380666 |
| C | 0.276530  | 0.017367  | 0.472651  |
| C | -1.127512 | -0.140444 | 0.194701  |
| H | -2.654368 | -0.308089 | -1.294640 |
| H | 2.751475  | 0.318720  | 0.690439  |
| H | 2.906131  | 1.240968  | -0.838586 |
| S | -1.122462 | -0.063520 | -3.851953 |
| S | 0.912779  | 0.172644  | -4.412582 |
| N | 1.559546  | 0.225302  | -2.879579 |
| C | -0.705334 | -0.054611 | -2.161298 |
| C | 0.699605  | 0.108813  | -1.911661 |
| H | 3.113862  | -0.510227 | -0.856112 |

BTA<sup>•</sup>-CBPQT<sup>•3+</sup>

| Atom | X         | Y         | Z         |
|------|-----------|-----------|-----------|
| N    | 2.899921  | 3.420471  | 1.437741  |
| N    | -2.749627 | -3.464387 | -1.193708 |
| N    | -3.768603 | 2.897909  | -0.873145 |
| N    | 3.711023  | -2.913180 | 1.449354  |
| C    | 4.293529  | 3.284432  | 1.910814  |
| C    | -4.148536 | -3.316862 | -1.704009 |
| C    | 1.862817  | 3.251134  | 2.309171  |
| C    | -1.715929 | -3.148722 | -1.997018 |
| C    | 0.567043  | 3.236119  | 1.893319  |
| C    | -0.421121 | -3.154911 | -1.522113 |
| C    | 0.221562  | 3.381633  | 0.514010  |
| C    | -0.170632 | -3.487572 | -0.187193 |
| C    | 1.338757  | 3.572097  | -0.359490 |
| C    | -1.259299 | -3.862320 | 0.606603  |
| C    | 2.617889  | 3.585503  | 0.112237  |

|   |           |           |           |
|---|-----------|-----------|-----------|
| C | -2.533945 | -3.838038 | 0.082288  |
| C | -1.125351 | 3.310194  | 0.050834  |
| C | 1.195517  | -3.378574 | 0.387240  |
| C | -2.234660 | 3.134049  | 0.936094  |
| C | 2.346428  | -3.527265 | -0.393076 |
| C | -3.493343 | 2.921961  | 0.465584  |
| C | 3.588636  | -3.284475 | 0.159920  |
| C | -2.754693 | 3.152612  | -1.753285 |
| C | 2.624225  | -2.828772 | 2.238630  |
| C | -1.476691 | 3.367888  | -1.334525 |
| C | 1.362613  | -3.057227 | 1.736507  |
| C | -5.074981 | 2.406276  | -1.353092 |
| C | 5.034753  | -2.464671 | 1.991423  |
| C | -5.038831 | 0.898157  | -1.500205 |
| C | 5.053252  | -0.954559 | 2.056850  |
| C | -5.259084 | 0.074445  | -0.391408 |
| C | 5.496486  | -0.202492 | 0.967669  |
| C | -5.024236 | -1.294670 | -0.468899 |
| C | 5.317553  | 1.178012  | 0.948397  |
| C | -4.566003 | -1.865043 | -1.660022 |
| C | 4.685957  | 1.825154  | 2.011564  |
| C | -4.434250 | -1.059301 | -2.791842 |
| C | 4.332626  | 1.082457  | 3.139952  |
| C | -4.670013 | 0.312266  | -2.712191 |
| C | 4.516384  | -0.294738 | 3.164667  |
| H | 4.361481  | 3.783911  | 2.879503  |
| H | -4.160862 | -3.717685 | -2.717986 |
| H | 4.933396  | 3.824465  | 1.211140  |
| H | -4.781243 | -3.947393 | -1.079296 |
| H | 2.126975  | 3.130022  | 3.351730  |
| H | -1.954881 | -2.865177 | -3.014324 |
| H | -0.186262 | 3.090286  | 2.656220  |

|   |           |           |           |
|---|-----------|-----------|-----------|
| H | 0.369400  | -2.857404 | -2.200003 |
| H | 1.208723  | 3.711764  | -1.424603 |
| H | -1.139701 | -4.177738 | 1.635127  |
| H | 3.468107  | 3.726390  | -0.543429 |
| H | -3.402119 | -4.108638 | 0.667725  |
| H | -2.110445 | 3.141666  | 2.010703  |
| H | 2.302153  | -3.822309 | -1.433850 |
| H | -4.332956 | 2.758989  | 1.129243  |
| H | 4.500641  | -3.361526 | -0.416962 |
| H | -3.021878 | 3.160858  | -2.802643 |
| H | 2.784500  | -2.545507 | 3.269449  |
| H | -0.735488 | 3.550978  | -2.101954 |
| H | 0.523847  | -2.931438 | 2.409456  |
| H | -5.288042 | 2.896341  | -2.304531 |
| H | 5.151173  | -2.928429 | 2.971808  |
| H | -5.833047 | 2.721276  | -0.633412 |
| H | 5.802600  | -2.861597 | 1.328068  |
| H | -5.592956 | 0.503449  | 0.548692  |
| H | 5.951864  | -0.693670 | 0.112788  |
| H | -5.182142 | -1.910436 | 0.411714  |
| H | 5.636714  | 1.744226  | 0.078146  |
| H | -4.129821 | -1.494272 | -3.739398 |
| H | 3.894832  | 1.572656  | 4.004140  |
| H | -4.541444 | 0.925550  | -3.599267 |
| H | 4.225113  | -0.851145 | 4.050793  |
| S | -0.555106 | -0.246748 | 3.242778  |
| S | -2.254053 | -0.307647 | 1.967920  |
| N | 1.030730  | 0.057026  | -0.230908 |
| N | 0.609581  | -0.102931 | 2.056639  |
| C | -1.732550 | -0.000711 | -0.741124 |
| C | 2.463571  | 0.113448  | -0.010280 |
| C | 0.157410  | -0.046033 | 0.837327  |

|   |           |           |           |
|---|-----------|-----------|-----------|
| C | -1.252298 | -0.107141 | 0.555874  |
| H | -2.794673 | -0.014786 | -0.928820 |
| H | 2.646998  | 0.077106  | 1.060146  |
| H | 2.862811  | 1.037728  | -0.429603 |
| S | -1.253554 | 0.268053  | -3.471166 |
| S | 0.790299  | 0.458828  | -4.023013 |
| N | 1.447556  | 0.320407  | -2.495398 |
| C | -0.832571 | 0.140914  | -1.784363 |
| C | 0.583125  | 0.181964  | -1.533728 |
| H | 2.949207  | -0.723404 | -0.518638 |

BTA<sup>•</sup>-CBPQT<sup>2(•+)</sup>(T)

| Atom | X         | Y         | Z         |
|------|-----------|-----------|-----------|
| N    | 3.010678  | 3.526788  | 1.395739  |
| N    | -2.850168 | -3.515170 | -1.330418 |
| N    | -3.589171 | 2.847554  | -1.064962 |
| N    | 3.761235  | -2.831880 | 1.098013  |
| C    | 4.397325  | 3.365021  | 1.881944  |
| C    | -4.241034 | -3.352713 | -1.797335 |
| C    | 1.963451  | 3.273232  | 2.234128  |
| C    | -1.804616 | -3.398870 | -2.201263 |
| C    | 0.678959  | 3.225729  | 1.788099  |
| C    | -0.512132 | -3.359099 | -1.772604 |
| C    | 0.360084  | 3.414953  | 0.408308  |
| C    | -0.187297 | -3.406343 | -0.380809 |
| C    | 1.483190  | 3.711862  | -0.426386 |
| C    | -1.310778 | -3.578936 | 0.487019  |
| C    | 2.749831  | 3.756517  | 0.075661  |
| C    | -2.582104 | -3.620835 | 0.005335  |
| C    | -0.969014 | 3.283904  | -0.090280 |
| C    | 1.143081  | -3.263848 | 0.111137  |
| C    | -2.099887 | 3.137255  | 0.772495  |

|   |           |           |           |
|---|-----------|-----------|-----------|
| C | 2.293320  | -3.231154 | -0.739127 |
| C | -3.348273 | 2.920105  | 0.278147  |
| C | 3.543073  | -3.019474 | -0.236713 |
| C | -2.547373 | 3.035604  | -1.928010 |
| C | 2.695167  | -2.891726 | 1.948666  |
| C | -1.278835 | 3.262221  | -1.486237 |
| C | 1.428828  | -3.110825 | 1.502482  |
| C | -4.908342 | 2.407359  | -1.560594 |
| C | 5.078897  | -2.390860 | 1.602787  |
| C | -4.951567 | 0.898915  | -1.681315 |
| C | 5.111057  | -0.884559 | 1.756667  |
| C | -5.231030 | 0.106352  | -0.564244 |
| C | 5.539845  | -0.068589 | 0.708589  |
| C | -5.071710 | -1.275094 | -0.621500 |
| C | 5.377733  | 1.312339  | 0.776927  |
| C | -4.629267 | -1.889531 | -1.796390 |
| C | 4.783767  | 1.901143  | 1.894100  |
| C | -4.442310 | -1.107636 | -2.937272 |
| C | 4.442435  | 1.093022  | 2.980665  |
| C | -4.603438 | 0.275504  | -2.880346 |
| C | 4.605155  | -0.286153 | 2.912520  |
| H | 4.449122  | 3.803390  | 2.880808  |
| H | -4.309408 | -3.784361 | -2.797544 |
| H | 5.045988  | 3.948291  | 1.226019  |
| H | -4.880872 | -3.938841 | -1.134796 |
| H | 2.212571  | 3.103459  | 3.273616  |
| H | -2.062807 | -3.323844 | -3.250162 |
| H | -0.083620 | 2.996208  | 2.520686  |
| H | 0.252886  | -3.246902 | -2.530521 |
| H | 1.364247  | 3.914735  | -1.482769 |
| H | -1.188204 | -3.684162 | 1.556784  |
| H | 3.607820  | 3.970885  | -0.549186 |

|   |           |           |           |
|---|-----------|-----------|-----------|
| H | -3.438745 | -3.741339 | 0.656172  |
| H | -2.002226 | 3.196440  | 1.848390  |
| H | 2.210208  | -3.379403 | -1.808062 |
| H | -4.207642 | 2.798660  | 0.924931  |
| H | 4.419068  | -2.983828 | -0.872447 |
| H | -2.784404 | 2.979001  | -2.982959 |
| H | 2.911631  | -2.745082 | 2.998739  |
| H | -0.511372 | 3.381722  | -2.240616 |
| H | 0.644718  | -3.122096 | 2.248007  |
| H | -5.079345 | 2.889864  | -2.524551 |
| H | 5.251203  | -2.894621 | 2.556277  |
| H | -5.661662 | 2.775827  | -0.861316 |
| H | 5.833779  | -2.739994 | 0.896427  |
| H | -5.549154 | 0.568083  | 0.366121  |
| H | 5.969651  | -0.512021 | -0.185182 |
| H | -5.267035 | -1.870389 | 0.265999  |
| H | 5.682118  | 1.928549  | -0.064646 |
| H | -4.141399 | -1.572550 | -3.871842 |
| H | 4.025426  | 1.534937  | 3.880975  |
| H | -4.428597 | 0.869840  | -3.772800 |
| H | 4.315118  | -0.897089 | 3.762654  |
| S | -0.596213 | -0.204618 | 3.139422  |
| S | -2.269844 | -0.333886 | 1.837662  |
| N | 1.036462  | 0.146259  | -0.305076 |
| N | 0.582809  | -0.015596 | 1.976535  |
| C | -1.697390 | -0.169834 | -0.870285 |
| C | 2.457192  | 0.306076  | -0.060529 |
| C | 0.152361  | -0.008954 | 0.746794  |
| C | -1.243204 | -0.161876 | 0.440902  |
| H | -2.748235 | -0.290381 | -1.078892 |
| H | 2.619197  | 0.357879  | 1.012188  |
| H | 2.808740  | 1.218409  | -0.543507 |

|   |           |           |           |
|---|-----------|-----------|-----------|
| S | -1.177240 | -0.011183 | -3.598645 |
| S | 0.870471  | 0.230741  | -4.122086 |
| N | 1.498349  | 0.256542  | -2.571771 |
| C | -0.785174 | -0.024810 | -1.898741 |
| C | 0.619191  | 0.130913  | -1.621138 |
| H | 3.000092  | -0.538083 | -0.487620 |

BTA<sup>•</sup>-CBPQT<sup>2(•+)</sup>(S)

| Atom | X         | Y         | Z         |
|------|-----------|-----------|-----------|
| N    | -3.735697 | 3.180464  | 0.017831  |
| N    | 3.418470  | -3.185450 | 0.128116  |
| N    | 3.339915  | 3.211328  | 0.255737  |
| N    | -3.658838 | -3.220975 | 0.002650  |
| C    | -5.179232 | 2.865728  | -0.033712 |
| C    | 4.861199  | -2.873782 | 0.173806  |
| C    | -3.017989 | 3.408242  | -1.121093 |
| C    | 2.701262  | -3.299364 | 1.285778  |
| C    | -1.657381 | 3.502214  | -1.108589 |
| C    | 1.344145  | -3.396193 | 1.282110  |
| C    | -0.909725 | 3.359128  | 0.102897  |
| C    | 0.595065  | -3.366545 | 0.064509  |
| C    | -1.708829 | 3.167621  | 1.272949  |
| C    | 1.391162  | -3.306925 | -1.122032 |
| C    | -3.063659 | 3.073754  | 1.201940  |
| C    | 2.748311  | -3.205225 | -1.061722 |
| C    | 0.515111  | 3.370121  | 0.149293  |
| C    | -0.830716 | -3.365748 | 0.042123  |
| C    | 1.334288  | 3.390643  | -1.022836 |
| C    | -1.612413 | -3.190644 | 1.225443  |
| C    | 2.691369  | 3.300538  | -0.943462 |
| C    | -2.969826 | -3.108617 | 1.175717  |
| C    | 2.599830  | 3.240600  | 1.403361  |



|   |           |           |           |
|---|-----------|-----------|-----------|
| C | -2.956712 | -3.432292 | -1.149364 |
| C | 1.242109  | 3.324365  | 1.380032  |
| C | -1.595053 | -3.505132 | -1.159364 |
| C | 4.787920  | 2.926535  | 0.312286  |
| C | -5.109149 | -2.935005 | -0.026847 |
| C | 5.036046  | 1.432998  | 0.298820  |
| C | -5.355281 | -1.441015 | -0.033469 |
| C | 5.197299  | 0.756022  | -0.911144 |
| C | -5.418782 | -0.732069 | 1.167497  |
| C | 5.215647  | -0.636999 | -0.945085 |
| C | -5.438576 | 0.658987  | 1.165516  |
| C | 5.074923  | -1.375940 | 0.230777  |
| C | -5.392153 | 1.366437  | -0.037334 |
| C | 5.015091  | -0.697166 | 1.451052  |
| C | -5.424843 | 0.656310  | -1.238546 |
| C | 4.994923  | 0.694494  | 1.484814  |
| C | -5.407678 | -0.735116 | -1.236550 |
| H | -5.586205 | 3.333361  | -0.931619 |
| H | 5.278393  | -3.372373 | 1.050707  |
| H | -5.649253 | 3.334570  | 0.833475  |
| H | 5.323143  | -3.310318 | -0.713682 |
| H | -3.590180 | 3.502978  | -2.035687 |
| H | 3.274257  | -3.309239 | 2.204246  |
| H | -1.170366 | 3.688875  | -2.056962 |
| H | 0.858293  | -3.497619 | 2.243747  |
| H | -1.263521 | 3.051363  | 2.251960  |
| H | 0.940500  | -3.293152 | -2.106328 |
| H | -3.669435 | 2.899824  | 2.081630  |
| H | 3.356963  | -3.120006 | -1.953115 |
| H | 0.902330  | 3.441488  | -2.014234 |
| H | -1.151696 | -3.070170 | 2.197094  |
| H | 3.317389  | 3.281974  | -1.826589 |

|   |           |           |           |
|---|-----------|-----------|-----------|
| H | -3.563206 | -2.939066 | 2.064753  |
| H | 3.154769  | 3.193114  | 2.331726  |
| H | -3.542815 | -3.533940 | -2.054249 |
| H | 0.739601  | 3.352034  | 2.337879  |
| H | -1.119536 | -3.683899 | -2.115105 |
| H | 5.179486  | 3.389962  | 1.219854  |
| H | -5.520194 | -3.414583 | -0.916626 |
| H | 5.255720  | 3.416123  | -0.543902 |
| H | -5.556025 | -3.410051 | 0.849025  |
| H | 5.278821  | 1.313320  | -1.840145 |
| H | -5.431808 | -1.263398 | 2.115079  |
| H | 5.310878  | -1.146709 | -1.899600 |
| H | -5.467284 | 1.192041  | 2.111726  |
| H | 4.952325  | -1.253271 | 2.382238  |
| H | -5.425583 | 1.188876  | -2.185513 |
| H | 4.915149  | 1.202822  | 2.441471  |
| H | -5.395590 | -1.269876 | -2.182248 |
| S | -0.574780 | -0.064933 | 3.387314  |
| S | 1.454615  | -0.088949 | 2.756703  |
| N | -0.916096 | 0.018523  | -0.424326 |
| N | -1.281463 | -0.038010 | 1.877125  |
| C | 1.856576  | -0.002867 | 0.013838  |
| C | -2.339302 | 0.012145  | -0.700757 |
| C | -0.448770 | -0.016811 | 0.875914  |
| C | 0.973786  | -0.029156 | 1.082943  |
| H | 2.919692  | -0.011451 | 0.189396  |
| H | -2.876452 | 0.061819  | 0.242018  |
| H | -2.602005 | -0.897342 | -1.242610 |
| S | 2.314245  | 0.085779  | -2.729214 |
| S | 0.568952  | 0.088973  | -3.943066 |
| N | -0.562713 | 0.061013  | -2.712552 |
| C | 1.354421  | 0.034366  | -1.274544 |

| C                                     | -0.064569 | 0.038426  | -1.510410 |
|---------------------------------------|-----------|-----------|-----------|
| H                                     | -2.589196 | 0.867363  | -1.328998 |
| BTA <sup>•</sup> -CBPQT <sup>•+</sup> |           |           |           |
| Atom                                  | X         | Y         | Z         |
| N                                     | 2.895989  | 3.503427  | 1.387486  |
| N                                     | -2.734872 | -3.378396 | -1.331576 |
| N                                     | -3.813766 | 3.068903  | -1.065510 |
| N                                     | 3.840132  | -2.928381 | 1.223158  |
| C                                     | 4.263532  | 3.314071  | 1.868163  |
| C                                     | -4.116697 | -3.221164 | -1.826968 |
| C                                     | 1.821671  | 3.260358  | 2.230139  |
| C                                     | -1.670506 | -3.249546 | -2.176091 |
| C                                     | 0.550505  | 3.178813  | 1.791904  |
| C                                     | -0.385975 | -3.262816 | -1.722229 |
| C                                     | 0.192968  | 3.313052  | 0.380046  |
| C                                     | -0.090199 | -3.384203 | -0.328335 |
| C                                     | 1.370037  | 3.505241  | -0.469620 |
| C                                     | -1.236172 | -3.539576 | 0.512979  |
| C                                     | 2.620319  | 3.585532  | 0.031352  |
| C                                     | -2.497784 | -3.530303 | 0.004687  |
| C                                     | -1.098353 | 3.266978  | -0.086961 |
| C                                     | 1.235275  | -3.318006 | 0.190319  |
| C                                     | -2.269352 | 3.120132  | 0.776635  |
| C                                     | 2.401827  | -3.320406 | -0.638075 |
| C                                     | -3.519771 | 3.005542  | 0.291160  |
| C                                     | 3.644509  | -3.121608 | -0.114279 |
| C                                     | -2.735693 | 3.219902  | -1.929268 |
| C                                     | 2.760426  | -2.994109 | 2.057073  |
| C                                     | -1.464131 | 3.344281  | -1.501481 |
| C                                     | 1.499813  | -3.196244 | 1.588831  |
| C                                     | -5.072099 | 2.512668  | -1.557436 |

|   |           |           |           |
|---|-----------|-----------|-----------|
| C | 5.134136  | -2.435267 | 1.741217  |
| C | -5.017093 | 1.002227  | -1.684644 |
| C | 5.110628  | -0.925782 | 1.858840  |
| C | -5.258943 | 0.185779  | -0.574974 |
| C | 5.528035  | -0.121427 | 0.797380  |
| C | -5.023994 | -1.184643 | -0.636043 |
| C | 5.316236  | 1.254379  | 0.827967  |
| C | -4.541347 | -1.769540 | -1.809978 |
| C | 4.675224  | 1.853923  | 1.913504  |
| C | -4.376383 | -0.969842 | -2.941645 |
| C | 4.335409  | 1.057579  | 3.009662  |
| C | -4.611857 | 0.402160  | -2.878539 |
| C | 4.553014  | -0.315741 | 2.984998  |
| H | 4.332371  | 3.760700  | 2.864865  |
| H | -4.154244 | -3.635148 | -2.836404 |
| H | 4.929333  | 3.880905  | 1.211370  |
| H | -4.759981 | -3.833559 | -1.191651 |
| H | 2.070171  | 3.153337  | 3.280233  |
| H | -1.906728 | -3.121414 | -3.225021 |
| H | -0.212465 | 2.991430  | 2.538478  |
| H | 0.397183  | -3.132255 | -2.458532 |
| H | 1.264178  | 3.598981  | -1.544283 |
| H | -1.138574 | -3.677775 | 1.581684  |
| H | 3.484372  | 3.732927  | -0.608010 |
| H | -3.371360 | -3.645887 | 0.633425  |
| H | -2.158886 | 3.097819  | 1.854404  |
| H | 2.334260  | -3.475319 | -1.707377 |
| H | -4.378442 | 2.891244  | 0.944309  |
| H | 4.532720  | -3.095989 | -0.733561 |
| H | -2.990152 | 3.254699  | -2.983376 |
| H | 2.962047  | -2.856997 | 3.111466  |
| H | -0.703018 | 3.483305  | -2.261270 |

|   |           |           |           |
|---|-----------|-----------|-----------|
| H | 0.703097  | -3.206587 | 2.320605  |
| H | -5.288903 | 2.972439  | -2.525929 |
| H | 5.304973  | -2.912735 | 2.708649  |
| H | -5.864404 | 2.811903  | -0.864724 |
| H | 5.912219  | -2.774649 | 1.055289  |
| H | -5.611818 | 0.626088  | 0.353557  |
| H | 5.990961  | -0.573014 | -0.076009 |
| H | -5.199112 | -1.795635 | 0.245342  |
| H | 5.619290  | 1.860418  | -0.021986 |
| H | -4.039564 | -1.413213 | -3.874673 |
| H | 3.878194  | 1.508033  | 3.886294  |
| H | -4.452947 | 1.011777  | -3.763943 |
| H | 4.264838  | -0.915500 | 3.844150  |
| S | -0.684324 | -0.326671 | 3.162476  |
| S | -2.345675 | -0.255433 | 1.841489  |
| N | 1.018814  | 0.002630  | -0.247733 |
| N | 0.523263  | -0.197528 | 2.020720  |
| C | -1.726415 | 0.015440  | -0.846353 |
| C | 2.440382  | 0.106159  | 0.021078  |
| C | 0.110454  | -0.098139 | 0.788359  |
| C | -1.289189 | -0.099938 | 0.464492  |
| H | -2.780648 | 0.061160  | -1.066153 |
| H | 2.605000  | -0.044684 | 1.083596  |
| H | 2.790070  | 1.094421  | -0.277664 |
| S | -1.159669 | 0.207656  | -3.562135 |
| S | 0.907933  | 0.303461  | -4.055745 |
| N | 1.519736  | 0.193325  | -2.499617 |
| C | -0.789960 | 0.095693  | -1.858881 |
| C | 0.618967  | 0.100409  | -1.563414 |
| H | 2.975515  | -0.647092 | -0.556961 |

| Atom | X         | Y         | Z         |
|------|-----------|-----------|-----------|
| N    | 2.701184  | 3.345711  | 1.396756  |
| N    | -2.578652 | -3.279282 | -1.072293 |
| N    | -4.027489 | 3.229262  | -1.016633 |
| N    | 4.133049  | -3.281894 | 1.329900  |
| C    | 4.064779  | 3.147351  | 1.882472  |
| C    | -3.954332 | -3.122087 | -1.532995 |
| C    | 1.619603  | 3.247035  | 2.255403  |
| C    | -1.508410 | -3.122264 | -1.934797 |
| C    | 0.341746  | 3.255056  | 1.826585  |
| C    | -0.225203 | -3.178393 | -1.522855 |
| C    | -0.012857 | 3.349792  | 0.410562  |
| C    | 0.140143  | -3.388054 | -0.120832 |
| C    | 1.169226  | 3.376158  | -0.452655 |
| C    | -1.032270 | -3.457990 | 0.751173  |
| C    | 2.425141  | 3.371010  | 0.040256  |
| C    | -2.291595 | -3.405175 | 0.275424  |
| C    | -1.305435 | 3.398558  | -0.049777 |
| C    | 1.430524  | -3.478296 | 0.333876  |
| C    | -2.479327 | 3.356366  | 0.821785  |
| C    | 2.613339  | -3.426030 | -0.529744 |
| C    | -3.732451 | 3.245482  | 0.342544  |
| C    | 3.858376  | -3.295667 | -0.034266 |
| C    | -2.945792 | 3.330877  | -1.886907 |
| C    | 3.052129  | -3.483196 | 2.184989  |
| C    | -1.672029 | 3.446053  | -1.465442 |
| C    | 1.786322  | -3.611668 | 1.748566  |
| C    | -5.249595 | 2.565683  | -1.469650 |
| C    | 5.307263  | -2.565736 | 1.823423  |
| C    | -5.090357 | 1.058929  | -1.525889 |
| C    | 5.100570  | -1.063185 | 1.897072  |

|   |           |           |           |
|---|-----------|-----------|-----------|
| C | -5.194573 | 0.288985  | -0.362274 |
| C | 5.595180  | -0.213680 | 0.906838  |
| C | -4.869495 | -1.063596 | -0.373608 |
| C | 5.299747  | 1.148865  | 0.923662  |
| C | -4.430230 | -1.682562 | -1.547691 |
| C | 4.494071  | 1.692441  | 1.924201  |
| C | -4.393402 | -0.931396 | -2.722559 |
| C | 4.041155  | 0.850363  | 2.943155  |
| C | -4.717170 | 0.424558  | -2.711833 |
| C | 4.342024  | -0.505967 | 2.931061  |
| H | 4.124330  | 3.590008  | 2.881530  |
| H | -4.024964 | -3.551653 | -2.536699 |
| H | 4.736279  | 3.720789  | 1.236458  |
| H | -4.592034 | -3.725391 | -0.879705 |
| H | 1.867314  | 3.175498  | 3.308710  |
| H | -1.769896 | -2.943015 | -2.972171 |
| H | -0.429242 | 3.177044  | 2.583876  |
| H | 0.540957  | -3.026066 | -2.274839 |
| H | 1.063567  | 3.397830  | -1.531368 |
| H | -0.916012 | -3.553239 | 1.824009  |
| H | 3.294967  | 3.395843  | -0.607841 |
| H | -3.153658 | -3.465346 | 0.930429  |
| H | -2.367918 | 3.415855  | 1.897879  |
| H | 2.510454  | -3.488730 | -1.607951 |
| H | -4.595010 | 3.202227  | 0.999921  |
| H | 4.730626  | -3.224364 | -0.677141 |
| H | -3.202904 | 3.333113  | -2.941289 |
| H | 3.309239  | -3.565898 | 3.236569  |
| H | -0.909760 | 3.555209  | -2.228970 |
| H | 1.025669  | -3.820430 | 2.492474  |
| H | -5.503790 | 2.962282  | -2.457319 |
| H | 5.545165  | -2.966244 | 2.814528  |

|   |           |           |           |
|---|-----------|-----------|-----------|
| H | -6.054299 | 2.846034  | -0.783083 |
| H | 6.147998  | -2.801872 | 1.163599  |
| H | -5.511766 | 0.755846  | 0.566523  |
| H | 6.203934  | -0.619759 | 0.102682  |
| H | -4.939406 | -1.636884 | 0.547117  |
| H | 5.681974  | 1.789537  | 0.132521  |
| H | -4.087581 | -1.401653 | -3.653403 |
| H | 3.433365  | 1.253925  | 3.748742  |
| H | -4.656799 | 0.996734  | -3.634231 |
| H | 3.967416  | -1.142204 | 3.728384  |
| S | -0.387026 | -0.367762 | 3.017587  |
| S | -2.111679 | 0.041208  | 1.852146  |
| N | 1.087255  | -0.027368 | -0.495357 |
| N | 0.740105  | -0.288312 | 1.794136  |
| C | -1.685734 | 0.237466  | -0.880565 |
| C | 2.529424  | -0.045786 | -0.327984 |
| C | 0.250497  | -0.098407 | 0.603017  |
| C | -1.162950 | 0.057086  | 0.390502  |
| H | -2.743994 | 0.390628  | -1.020480 |
| H | 2.749439  | -0.167260 | 0.727583  |
| H | 2.942925  | 0.896445  | -0.691677 |
| S | -1.311742 | 0.400245  | -3.631418 |
| S | 0.716463  | 0.366502  | -4.277536 |
| N | 1.434279  | 0.166533  | -2.773374 |
| C | -0.823631 | 0.245084  | -1.958905 |
| C | 0.599197  | 0.121771  | -1.772984 |
| H | 2.959160  | -0.875442 | -0.888107 |

---
